# Supplementary material
Source: PubMed Central journal article supplement (PMC5226373)
Supplement: NIHMS777234-supplement-Online_Appendix.pdf [file NIHMS777234-supplement-Online_Appendix.pdf]

## Supplementary Online Content

Kavalieratos D, Corbelli J, Zhang Di, et al. Diagnostic Association between palliative care and patient and caregiver outcomes: a systematic review and meta-analysis. *JAMA*. doi:10.1001/jama.2016.16840

**eText 1.** Methodological Details Regarding Search Strategy

**eTable 1.** Study Inclusion and Exclusion Criteria

**eText 2.** Methodological Details Regarding Risk of Bias Assessment

**eText 3.** Translation of Standardized Mean Differences to Clinical Values

**eTable 2.** Trial Characteristics and Outcomes of 6 Palliative Care Interventions at Low Risk of Bias

**eTable 3.** Trial Characteristics and Outcomes of 26 Palliative Care Interventions at High Risk of Bias

**eTable 4.** Trial Characteristics and Outcomes of 11 Palliative Care Interventions at Unclear Risk of Bias

**eTable 5.** Risk of Bias Assessments of 43 Randomized Clinical Trials of Palliative Care Interventions

**eTable 6.** Risk of Bias Judgments in 43 Randomized Clinical Trials of Palliative Care Interventions

**eFigure 1.** Palliative Care Domains Addressed in 43 Randomized Clinical Trials of Palliative Care Interventions

**eFigure 2.** Association of Palliative Care and Patient Quality of Life at 1-3 Month Follow-up Stratified by Disease

**eFigure 3.** Association of Palliative Care and Patient Quality of Life at 1-3 Month Follow-up Stratified by Setting

**eFigure 4.** Sensitivity Analysis of the Association Between Palliative Care and Patient Quality of Life Assessed at a Discrete Time Point (3 Months)

**eFigure 5.** Sensitivity Analysis of the Association Between Palliative Care and Patient Quality of Life Assessed at a Discrete Time Point (6 Months)

**eFigure 6.** Assessment of Publication Bias Regarding Quality of Life at 1-3 Month Follow-up in Randomized Clinical Trials of Palliative Care Interventions

**eTable 7.** Meta-Regression Analysis to Explore Sources of Heterogeneity Among Randomized Clinical Trials of Palliative Care

**eFigure 7.** Association of Palliative Care and Patient Symptom Burden at 1-3 Month Follow-up Stratified by Disease

**eFigure 8.** Association of Palliative Care and Patient Symptom Burden at 1-3 Month Follow-up Stratified by Setting

**eFigure 9.** Sensitivity Analysis of the Association between Palliative Care and Patient Symptom Burden at a Discrete Timepoint (3 months)

**eFigure 10.** Assessment of Publication Bias Regarding Symptom Burden at 1-3 Month Follow-Up in Randomized Clinical Trials of Palliative Care Interventions

**eFigure 11.** Association of Palliative Care and Patient Survival Stratified by Disease

**eFigure 12.** Association of Palliative Care and Patient Survival Stratified by Setting

**eFigure 13.** Sensitivity Analysis of Survival Meta-Analysis comparing Reported and Imputed Hazard Ratios

**eFigure 14.** Publication Bias Regarding Patient Survival in Randomized Clinical Trials of Palliative Care Interventions

**eTable 8.** Results of Univariable Meta-Regression Analysis to Identify Associations between Effect Size and Year of Publication and Intervention Intensity

**eFigure 15.** Plots of Effect Sizes and Follow-up Duration among Trials included in Quality of Life and Symptom Burden Meta-Analyses

**eTable 9.** Reasons for Trial Exclusion from Meta-Analysis

**eReferences**

This supplementary material has been provided by the authors to give readers additional information about their work.

Studies eligible for this review were determined by searching MEDLINE on the PubMed platform (1946-present), Elsevier EMBASE.com (1974-present), EBSCOhost CINAHL (Cumulative Index to Nursing and Allied Health Literature), and Cochrane Library's (John Wiley & Sons) Central Register of Controlled Trials (CENTRAL).

The controlled vocabularies of the databases furnished subject headings for the strategies that were combined with title/abstract words and keywords. Using each database platform's command language and search fields, the librarian searched for various relevant combinations of the following Subject Headings (MeSH, Emtree, etc.) and word groupings: palliative care, supportive care, caregivers, symptom management, terminal and/or life-limiting illness, cancer, pain, cost, quality of life, and satisfaction. Boolean operators (AND, OR, NOT) were applied to combine the topic hedges. The randomized trial string was adapted from the Cochrane Strategy and used to narrow the retrieval. The "similar articles" link, grant numbers, and reference lists of retrieved articles were used to identify additional eligible records.

#### PubMed/MEDLINE Search strategy

```
((((((("Palliative Care"[Mesh] OR "Terminal Care"[Mesh] OR "Terminally Ill"[Mesh] OR
"Hospices"[Mesh] OR "Hospice Care"[Mesh] OR "Hospice and Palliative Care Nursing"[Mesh] OR
palliat* OR "End of life" OR EOL[tiab] OR "terminal care" OR "terminal illness" OR "terminally ill" OR
"Terminal phase" OR "terminal stage" OR hospice*[tiab] OR hospice*[ot] OR "Stage IV cancer" OR
"Life-limiting"[tiab] OR "Actively dying" OR "terminal stage" OR "limited survival" OR terminal patient*
OR "Advance Care Planning"[Mesh] OR "Advance Care Planning"[ot] OR "Advance care planning"[tiab]
OR "life-threatening illness" OR life-threatening diagnos* OR "Bereavement"[Majr] OR bereavement[ot]
OR bereave*[title])) OR (((("Caregivers"[Mesh]) OR "supportive care")) AND ("life-threatening illness"
OR "life-threatening diagnoses" OR "progressive lung cancer" OR "Last year of life" OR "advanced
illness" OR "advanced cancer" OR "advanced cancer"[ot] OR "advanced disease" OR "advanced lung
cancer" OR "advanced dementia" OR "advanced transitional cell carcinoma" OR "advanced stages" OR
"advanced heart" OR "limited survival"[tiab] OR Inoperable OR Incurable OR unresectable))) OR
(("symptom control"[tiab] OR "symptom management"[title] OR "symptom control"[ot] OR "symptom
burden" OR "end stage")) AND ("life-threatening illness" OR "life-threatening diagnoses" OR "progressive
lung cancer" OR "Last year of life" OR "advanced illness" OR "advanced cancer" OR "advanced
cancer"[ot] OR "advanced disease" OR "advanced lung cancer" OR "advanced dementia" OR "advanced
transitional cell carcinoma" OR "advanced stages" OR "advanced heart" OR Inoperable OR Incurable OR
unresectable)))))) AND ("Randomized Controlled Trials as Topic"[Mesh] OR "Pragmatic Clinical Trials as
Topic"[Mesh] OR (Randomised Clinical Trial* OR Randomized Controlled Trial* OR randomised
controlled trial OR RCT OR RCTs OR RCT's OR randomized clinical trial* OR Quasi-random* OR
"randomized trial" OR "Randomised controlled" OR cluster random* OR randomised fast-track OR
"randomised trial" OR "Randomized controlled" OR randomized fast-track OR "randomized trial" OR
randomised[ot] OR randomized[ot] OR Randomized Controlled Trial[ptyp]) OR randomized
interventions[tiab] OR random*[title] OR cluster randomized trial OR pilot randomized OR (Random*
AND clinical AND trial[title]))) OR (((((((("Pain/drug therapy"[Mesh:NoExp] OR
"Pain/etiology"[Mesh:NoExp] OR "Pain/prevention and control"[Mesh:NoExp] OR
"Pain/psychology"[Mesh:NoExp] OR "Pain/radiation effects"[Mesh:NoExp] OR
"Pain/surgery"[Mesh:NoExp])) OR ( "Pain, Intractable/drug therapy"[Mesh] OR "Pain,
Intractable/prevention and control"[Mesh] OR "Pain, Intractable/radiotherapy"[Mesh] OR "Pain,
Intractable/surgery"[Mesh] OR "Pain, Intractable/therapy"[Mesh])) OR ("Neuralgia/drug
therapy"[Mesh:NoExp] OR "Neuralgia/prevention and control"[Mesh:NoExp] OR
"Neuralgia/radiotherapy"[Mesh:NoExp] OR "Neuralgia/surgery"[Mesh:NoExp] OR
"Neuralgia/therapy"[Mesh:NoExp])) OR ("Neuralgia, Postherpetic/drug therapy"[Mesh] OR "Neuralgia,
Postherpetic/prevention and control"[Mesh] OR "Neuralgia, Postherpetic/surgery"[Mesh] OR "Neuralgia,
Postherpetic/therapy"[Mesh])) OR ( "Nociceptive Pain/drug therapy"[Mesh] OR "Nociceptive
Pain/prevention and control"[Mesh] OR "Nociceptive Pain/radiotherapy"[Mesh] OR "Nociceptive
```

## eText 1. Methodological Details Regarding Search Strategy

Pain/surgery"[Mesh] OR "Nociceptive Pain/therapy"[Mesh])) OR ("Acute Pain/drug therapy"[Mesh] OR "Acute Pain/prevention and control"[Mesh] OR "Acute Pain/radiotherapy"[Mesh] OR "Acute Pain/surgery"[Mesh] OR "Acute Pain/therapy"[Mesh])) AND "Pain"[Majr:NoExp]) OR "Pain Management"[Mesh] OR "Breakthrough Pain"[Mesh] OR "Pain Clinics"[Mesh] OR "Pain Measurement"[Mesh] OR breakthrough pain[tiab] OR breakthrough pain[ot] OR cancer pain[ot] OR pain flare[ot] AND (("Costs and Cost Analysis"[Mesh] OR "Patient Satisfaction"[Mesh] OR "Quality of Life"[Mesh] OR "Survival Rate"[Mesh] OR "Communication"[Mesh] OR "Fatigue"[Mesh] OR "Dyspnea"[Mesh] OR "quality of life" OR QOL[tiab] OR satisfaction[tiab] OR clinical outcome\*)) AND ((neoplasms OR cancer[tiab] OR cancer[ot])) AND ("Randomized Controlled Trials as Topic"[Mesh] OR "Pragmatic Clinical Trials as Topic"[Mesh] OR Randomised Clinical Trial\* OR Randomized Controlled Trial\* OR randomised controlled trial OR RCT OR RCTs OR RCT's OR randomized clinical trial\* OR Randomized Controlled Trial[ptyp])) OR (SurvivorCare[tiab] OR "family meetings"[title] OR "CONNECT intervention"[tiab] OR "transitional care bridge"[title] OR "supportive care interventions"[title]) AND English[lang] NOT ((infant[MeSH] OR infant\*[tiab] OR newborn\*[tiab] OR neonat\*[tiab] OR child\*[ot] OR infant\*[ot] OR teen\*[tiab] OR teen\*[ot] OR pediatric\*[ot] OR pediatric\*[title] OR child[MeSH]))

**eTable 1. Study Inclusion and Exclusion Criteria**

| <b>Inclusion Criteria</b>                                                                                                                                                                                                                                                                                                                                                                                                                                                                                                                                                                                                                                                                                                                                                                                                | <b>Exclusion Criteria</b>                                                                                                                                                                                                                                                                                                                                                                                                                                                                                                                                                                                                      |
|--------------------------------------------------------------------------------------------------------------------------------------------------------------------------------------------------------------------------------------------------------------------------------------------------------------------------------------------------------------------------------------------------------------------------------------------------------------------------------------------------------------------------------------------------------------------------------------------------------------------------------------------------------------------------------------------------------------------------------------------------------------------------------------------------------------------------|--------------------------------------------------------------------------------------------------------------------------------------------------------------------------------------------------------------------------------------------------------------------------------------------------------------------------------------------------------------------------------------------------------------------------------------------------------------------------------------------------------------------------------------------------------------------------------------------------------------------------------|
| <ul style="list-style-type: none"><li>• Sample: Life-limiting illness (defined by classifications of disease severity, such as tumor stage or New York Heart Association class)</li><li>• Sample: Ages 18 and older</li><li>• Intervention: Self-described as “palliative care” and/or comprises at least two domains of palliative care, as defined by the National Consensus Project for Quality Palliative Care<sup>1</sup></li><li>• Study design: randomization</li><li>• Comparators: usual care, enhanced usual care, attention control</li><li>• Outcomes: study reports on at least one of pre-specified review outcomes (i.e., patient quality of life, symptom burden, mood, advance care planning, survival, resource utilization, satisfaction with care, healthcare expenditures, site of death)</li></ul> | <ul style="list-style-type: none"><li>• Sample: Indication for palliative care is not related to life-limiting illness (e.g., chronic, non-malignant pain)</li><li>• Intervention: single-focus intervention (e.g., advance care planning only, opioid therapy only), or study does not otherwise meet our definition of “palliative care” based on National Consensus Project for Quality Palliative Care<sup>1</sup></li><li>• Intervention: patient is not the target of intervention</li><li>• Intervention: caregiver is the exclusive or primary target of intervention</li><li>• Study design: non-randomized</li></ul> |

## eText 2. Methodological Details Regarding Risk of Bias Assessment

Outcome-level risk of bias was assessed using the Cochrane Collaboration's Risk of Bias tool. This tool comprises seven domains: random sequence generation, allocation concealment, blinding of participants and personnel, blinding of outcome assessment, incomplete outcome data, selective reporting, and other bias. Per recommendations from the Cochrane Collaboration, we modified the tool to assess risk of bias by categories of outcomes, as certain outcomes may be more or less susceptible to bias. As such, the risk of detection bias (blinding of outcome assessors) was evaluated separately for subjective (e.g., patient-reported outcomes) and objective (e.g., survival) outcomes. Within each domain, two reviewers independently judged each trial as having "low," "high," or "unclear" risk of bias. In the event that articles did not contain adequate information to render a conclusive judgment, study authors were contacted using open-ended questions as recommended by the Cochrane Collaboration (Section 8.3.4).

Although we assessed risk of performance bias (blinding of participants and personnel), this domain was excluded when generating summary judgments, as it is impracticable to blind patient participants in a behavioral intervention such as palliative care.

Each trial has two overall summary risk of bias judgments based on outcome type. If a trial was found to be of low risk of bias on all of the following domains, it was deemed to have low summary risk of bias for subjective outcomes: sequence generation, allocation concealment, incomplete outcome data, selective outcome reporting, and other sources of bias. If a trial was found to be of high risk of bias on any of the aforementioned domains, it was deemed to be of high summary risk of bias; similarly, if a trial was found to be of unclear risk of bias on any of the aforementioned domains, it was deemed to be of unclear summary risk of bias. Summary judgments for objective outcomes were generated similarly, except that "blinding of objective outcomes" was included in the summary determination.

We further modified the tool to assess risk of bias in cluster-randomized trials, adding the following domains per recommendations from the Cochrane Collaboration (Chapter 8.14.1.1): recruitment bias, baseline imbalance, and clustering-adjusted analysis. We excluded the domain of "recruitment bias" from summary judgments due to similar concerns regarding the impracticality of recruiting participants before cluster allocation in a seriously ill population.

### **eText 3. Translation of Standardized Mean Differences to Clinical Values**

For QOL (Quality of Life), we translated the SMD (standardized mean difference) to the FACIT-Pal (Functional Assessment of Chronic Illness Therapy – Palliative), a disease-agnostic measure of QOL developed to be sensitive to the burdens of individuals with serious illness. The SD (Standard Deviation) of the FACIT-Pal used in our calculations (SD: 24.7) is from a cross-sectional analysis of patients with advanced cancer (n=256).<sup>2</sup> Regarding symptom burden, we re-expressed SMDs using the ESAS (Edmonton Symptom Assessment Scale), a disease-agnostic symptom assessment measure commonly used in palliative populations. For our calculations, we calculated the pooled SD of baseline ESAS scores from an oncology palliative care trial (n= 461, SD: 15.6).<sup>3</sup>

**eTable 2. Trial Characteristics and Outcomes of 6 Palliative Care Interventions at Low Risk of Bias**

Trials with patient-level randomization

| Study (Country)                                | Design   | Patient Population                                                                      | Domains Addressed                                 | Intervention                                                                                                                                    |     | Control     |     | Main Results                                                                                                                                                                                                                                                                                                                                                                                                                                                                                                                                                                                                                                                                                                                                                                                                                                      | Risk of Bias        |                    |
|------------------------------------------------|----------|-----------------------------------------------------------------------------------------|---------------------------------------------------|-------------------------------------------------------------------------------------------------------------------------------------------------|-----|-------------|-----|---------------------------------------------------------------------------------------------------------------------------------------------------------------------------------------------------------------------------------------------------------------------------------------------------------------------------------------------------------------------------------------------------------------------------------------------------------------------------------------------------------------------------------------------------------------------------------------------------------------------------------------------------------------------------------------------------------------------------------------------------------------------------------------------------------------------------------------------------|---------------------|--------------------|
|                                                |          |                                                                                         |                                                   | Description                                                                                                                                     | n   | Description | n   |                                                                                                                                                                                                                                                                                                                                                                                                                                                                                                                                                                                                                                                                                                                                                                                                                                                   | Subjective Outcomes | Objective Outcomes |
| <b>Trials with patient-level randomization</b> |          |                                                                                         |                                                   |                                                                                                                                                 |     |             |     |                                                                                                                                                                                                                                                                                                                                                                                                                                                                                                                                                                                                                                                                                                                                                                                                                                                   |                     |                    |
| Bakitas et al, 2009 <sup>4,5</sup> (USA)       | Parallel | Recent GI, lung, GU, or breast cancer diagnosis; Prognosis approx. 1 year; Mean age: 65 | Structure, Physical, Psychological, Social, Legal | Manualized, nurse-led telephone intervention focusing on: problem solving, activation, education, symptom management, and advance care planning | 161 | Usual care  | 161 | <p><b>QOL</b></p> <ul style="list-style-type: none"> <li>[FACIT-Pal]: Mean difference [SE], 4.6[2]; P=0.02</li> </ul> <p><b>Symptom burden</b></p> <ul style="list-style-type: none"> <li>[ESAS]: mean difference [SE], -27.8[15]; P=0.06</li> </ul> <p><b>Survival:</b></p> <ul style="list-style-type: none"> <li>Median, 14 months [95% CI, 10.6-18.4] vs. 8.5 [7.0-11.1]; P=0.14</li> </ul> <p><b>Mood</b></p> <ul style="list-style-type: none"> <li>[CES-D]: Mean difference [SE], -1.8[0.81]; P=0.02</li> </ul> <p><b>Utilization:</b></p> <ul style="list-style-type: none"> <li>Days in hospital, 6.6 vs. 6.5; P=0.14</li> <li>Days in ICU, 0.06 vs. 0.06; P&gt;0.99</li> <li>ED visits, 0.86 vs. 0.63; P=0.53</li> </ul> <p><b>Caregiver burden</b></p> <ul style="list-style-type: none"> <li>[MBCB]: NS, data not reported</li> </ul> | Low                 | Low                |
| Higginson et al, 2014 <sup>6</sup> (UK)        | Parallel | COPD (54%), cancer (lung, breast,                                                       | Physical, Psychological, Spiritual                | Multi-professional integrated service                                                                                                           | 53  | Usual care  | 52  | <p><b>QOL</b></p> <ul style="list-style-type: none"> <li>[Chronic Respiratory Disease</li> </ul>                                                                                                                                                                                                                                                                                                                                                                                                                                                                                                                                                                                                                                                                                                                                                  | Low                 | Low                |

**eTable 2. Trial Characteristics and Outcomes of 6 Palliative Care Interventions at Low Risk of Bias**

| Study (Country) | Design | Patient Population                                                                                        | Domains Addressed | Intervention                                                                                                       |   | Control     |   | Main Results                                                                                                                                                                                                                                                                                                                                                                                                                                                                                                                                                                              | Risk of Bias        |                    |
|-----------------|--------|-----------------------------------------------------------------------------------------------------------|-------------------|--------------------------------------------------------------------------------------------------------------------|---|-------------|---|-------------------------------------------------------------------------------------------------------------------------------------------------------------------------------------------------------------------------------------------------------------------------------------------------------------------------------------------------------------------------------------------------------------------------------------------------------------------------------------------------------------------------------------------------------------------------------------------|---------------------|--------------------|
|                 |        |                                                                                                           |                   | Description                                                                                                        | n | Description | n |                                                                                                                                                                                                                                                                                                                                                                                                                                                                                                                                                                                           | Subjective Outcomes | Objective Outcomes |
|                 |        | urethral, colon, prostate, hematologic al) (20%), interstitial lung disease (18%), CHF (5%); Mean age: 67 |                   | combining respiratory medicine, physiotherapy, occupational therapy, and palliative care assessment and management |   |             |   | Questionnaire] Difference, 4.21 (95% CI, -4.52 to 12.94); P=0.34<br>• [EQ-5D] Difference, 0.092 (95% CI, -0.23 to 0.04); P=0.18<br><b>Symptom burden</b><br>• [NRS: dyspnea 24hr. mean]: Difference, -0.33 (95% CI, -1.28 to 0.62); P=0.49<br>• [Chronic Respiratory Disease Questionnaire - dyspnea]: Difference, 0.08 (95% CI, -0.38 to 0.52); P=0.75<br>• [Chronic Respiratory Disease Questionnaire - fatigue]: Difference, 0.02 (95% CI, -0.56 to 0.2); P=0.93<br><b>Survival</b><br>• Overall 6-month (94% vs. 75% alive; P=0.048); Survival benefit among cancer subgroup (P=0.97) |                     |                    |



**eTable 2. Trial Characteristics and Outcomes of 6 Palliative Care Interventions at Low Risk of Bias**

| Study (Country)                          | Design   | Patient Population                         | Domains Addressed                                 | Intervention                                                             |    | Control     |    | Main Results                                                                                                                                                                                                                                                                                                                                                                                                                                                                                                                                                                                                                                                                                                                     | Risk of Bias        |                    |
|------------------------------------------|----------|--------------------------------------------|---------------------------------------------------|--------------------------------------------------------------------------|----|-------------|----|----------------------------------------------------------------------------------------------------------------------------------------------------------------------------------------------------------------------------------------------------------------------------------------------------------------------------------------------------------------------------------------------------------------------------------------------------------------------------------------------------------------------------------------------------------------------------------------------------------------------------------------------------------------------------------------------------------------------------------|---------------------|--------------------|
|                                          |          |                                            |                                                   | Description                                                              | n  | Description | n  |                                                                                                                                                                                                                                                                                                                                                                                                                                                                                                                                                                                                                                                                                                                                  | Subjective Outcomes | Objective Outcomes |
|                                          |          |                                            |                                                   |                                                                          |    |             |    | <p><b>Mood</b></p> <ul style="list-style-type: none"> <li>• [HADS - anxiety] Difference, 0.1 (95% CI, -0.93 to 1.24); P=0.78</li> <li>• [HADS - depression] Difference, -1 (95% CI, -1.82 to 0.30); P=0.16</li> </ul> <p><b>Utilization</b></p> <ul style="list-style-type: none"> <li>• [Days in hospital] Difference, -0.52 (95% CI, -0.14 to 1.91); P=0.58</li> </ul> <p><b>Expenditures</b></p> <ul style="list-style-type: none"> <li>• [6-week mean costs] £1422 (95% CI, £897 to £2101) vs. £1408 (95% CI, £899 to £2023)</li> </ul> <p><b>Other</b></p> <ul style="list-style-type: none"> <li>• [Chronic Respiratory Disease Questionnaire – breathlessness mastery subscale]<sup>a</sup> ES, 0.44 (P=0.048)</li> </ul> |                     |                    |
| Lowther et al, 2015 <sup>7</sup> (Kenya) | Parallel | HIV with pain/symptom burden; Mean age: 39 | Physical, Psychological, Social, Spiritual, Legal | Primary palliative care (pain management, symptom management, nutrition, | 60 | Usual care  | 60 | <p><b>QOL</b></p> <ul style="list-style-type: none"> <li>• [MOS-HIV Physical subscale] coefficient, 0.44 (95% CI, -0.02 to 0.91); P=0.06</li> </ul>                                                                                                                                                                                                                                                                                                                                                                                                                                                                                                                                                                              | Low                 | N/A                |

**eTable 2. Trial Characteristics and Outcomes of 6 Palliative Care Interventions at Low Risk of Bias**

| Study (Country)                          | Design   | Patient Population                                    | Domains Addressed               | Intervention                                                                                                                                                    |                              | Control     |                              | Main Results                                                                                                                                                                                                                                                                                                                                                                                                                                                                                                                                                                                                                                              | Risk of Bias        |                    |
|------------------------------------------|----------|-------------------------------------------------------|---------------------------------|-----------------------------------------------------------------------------------------------------------------------------------------------------------------|------------------------------|-------------|------------------------------|-----------------------------------------------------------------------------------------------------------------------------------------------------------------------------------------------------------------------------------------------------------------------------------------------------------------------------------------------------------------------------------------------------------------------------------------------------------------------------------------------------------------------------------------------------------------------------------------------------------------------------------------------------------|---------------------|--------------------|
|                                          |          |                                                       |                                 | Description                                                                                                                                                     | n                            | Description | n                            |                                                                                                                                                                                                                                                                                                                                                                                                                                                                                                                                                                                                                                                           | Subjective Outcomes | Objective Outcomes |
|                                          |          |                                                       |                                 | psychosocial and spiritual support, ethical and legal issues) provided in an outpatient HIV clinic setting by HIV nurses without palliative care specialization |                              |             |                              | <ul style="list-style-type: none"> <li>• [MOS-HIV Mental subscale] coefficient, 0.61 (95% CI, 0.13 to 1.10); P=0.01</li> <li><b>Symptom burden</b></li> <li>• [African Palliative Outcomes Scale - Pain]<sup>a</sup> coefficient, -0.01 (95% CI, -0.36 to 0.34); P=0.95</li> <li>• [African Palliative Outcomes Scale -Other symptoms composite] coefficient, -0.05 (95% CI, -0.39 to 0.29); P=0.78</li> <li><b>Mood</b></li> <li>• [GHQ-12] coefficient, -0.50 (95% CI, -0.97 to -0.03); P=0.04</li> <li><b>Other</b></li> <li>• [African Palliative Outcome Scale]: Palliative care needs, coefficient, 0.69 (95% CI, 0.26 to 1.12); P=0.002</li> </ul> |                     |                    |
| Northouse et al, 2007 <sup>8</sup> (USA) | Parallel | Prostate cancer; Prognosis: ≥ 12 months; Mean age: 63 | Physical, Psychological, Social | Northouse et al, 2005 intervention adapted for prostate                                                                                                         | 129 patients, 129 caregivers | Usual care  | 134 patients, 134 caregivers | <b>QOL</b> <ul style="list-style-type: none"> <li>• [FACT-G]: 4 months (ES=0.16; P=0.10), 8 months</li> </ul>                                                                                                                                                                                                                                                                                                                                                                                                                                                                                                                                             | Low                 | N/A                |

**eTable 2. Trial Characteristics and Outcomes of 6 Palliative Care Interventions at Low Risk of Bias**

| Study (Country) | Design | Patient Population | Domains Addressed | Intervention |   | Control     |   | Main Results                                                                                                                                                                                                                                                                                                                                                                                                                                                                                                                         | Risk of Bias        |                    |
|-----------------|--------|--------------------|-------------------|--------------|---|-------------|---|--------------------------------------------------------------------------------------------------------------------------------------------------------------------------------------------------------------------------------------------------------------------------------------------------------------------------------------------------------------------------------------------------------------------------------------------------------------------------------------------------------------------------------------|---------------------|--------------------|
|                 |        |                    |                   | Description  | n | Description | n |                                                                                                                                                                                                                                                                                                                                                                                                                                                                                                                                      | Subjective Outcomes | Objective Outcomes |
|                 |        |                    |                   |              |   |             |   | (ES=0.01; p=0.89), 12 months<br>(ES=0.03; P=0.77)<br>• [SF-12 Physical]: 4 months (ES= -0.02; P=0.96), 8 months (ES=-0.05; p=0.80), 12 months (ES= 0.03; P=0.88);<br>• [SF-12 Mental]: 4 months (ES=0.08; P=0.53), 8 months (ES=-0.06; p=0.69), at 12 months (ES= -0.07; P=0.96)<br><b>Symptom burden</b><br>• [Omega Screening Questionnaire symptom distress]: 4 months (ES= -0.06; P=0.60), 8 months (ES=0.08; p=0.45), 12 months (ES=0.06; P=0.59)<br><b>Caregiver QOL</b><br>• [SF-12: Physical] 4 months (ES=-0.04; P=0.67), 8 |                     |                    |

**eTable 2. Trial Characteristics and Outcomes of 6 Palliative Care Interventions at Low Risk of Bias**

| Study (Country)                           | Design   | Patient Population                                                          | Domains Addressed                                     | Intervention                                                                             |                            | Control     |                            | Main Results                                                                                                                                                                                                                                                                                                                                                                                                                                                           | Risk of Bias        |                    |
|-------------------------------------------|----------|-----------------------------------------------------------------------------|-------------------------------------------------------|------------------------------------------------------------------------------------------|----------------------------|-------------|----------------------------|------------------------------------------------------------------------------------------------------------------------------------------------------------------------------------------------------------------------------------------------------------------------------------------------------------------------------------------------------------------------------------------------------------------------------------------------------------------------|---------------------|--------------------|
|                                           |          |                                                                             |                                                       | Description                                                                              | n                          | Description | n                          |                                                                                                                                                                                                                                                                                                                                                                                                                                                                        | Subjective Outcomes | Objective Outcomes |
|                                           |          |                                                                             |                                                       |                                                                                          |                            |             |                            | months (ES = 0.28; P=0.02), 12 months (ES = 0.32; P=0.005)<br>• [SF-12: Mental] 4 months (ES=0.25; P=0.03), 8 months (ES = -0.12; P=0.40), 12 months (ES = -0.07; P=0.76)<br>• [FACT-G] 4 months (ES = 0.26; P=0.004), 8 months (ES = 0.19; P=0.06), 12 months (ES = 0.14; P=0.18)<br><b>Caregiver burden</b><br>• [Appraisal of Caregiving Scale]: Negative appraisal at 4 months (ES = -0.32; P=0.002), 8 months (ES = 0.16; P=0.17), 12 months (ES = -0.08; P=0.51) |                     |                    |
| Rummans et al, 2006 <sup>9,10</sup> (USA) | Parallel | Advanced cancer (brain, head and neck, lung, ovarian, GI, other) undergoing | Structure, Physical, Psychological, Social, Spiritual | Structured, multidisciplinary, patient intervention to address physical, mental, social, | 49 patients, 43 caregivers | Usual care  | 54 patients, 40 caregivers | <b>QOL</b><br>• [Spitzer Uniscale] <sup>a</sup> : Improved at week 4 (72.8 vs. 64.1; P=0.047); NS at week 8 (71.9 vs 68.4,                                                                                                                                                                                                                                                                                                                                             | Low                 | N/A                |

**eTable 2. Trial Characteristics and Outcomes of 6 Palliative Care Interventions at Low Risk of Bias**

| Study (Country) | Design | Patient Population                                                               | Domains Addressed | Intervention             |   | Control     |   | Main Results                                                                                                                                                                                                                                                                                                                                                                                                                                                                                                                                                                                                                                                                                                                     | Risk of Bias        |                    |
|-----------------|--------|----------------------------------------------------------------------------------|-------------------|--------------------------|---|-------------|---|----------------------------------------------------------------------------------------------------------------------------------------------------------------------------------------------------------------------------------------------------------------------------------------------------------------------------------------------------------------------------------------------------------------------------------------------------------------------------------------------------------------------------------------------------------------------------------------------------------------------------------------------------------------------------------------------------------------------------------|---------------------|--------------------|
|                 |        |                                                                                  |                   | Description              | n | Description | n |                                                                                                                                                                                                                                                                                                                                                                                                                                                                                                                                                                                                                                                                                                                                  | Subjective Outcomes | Objective Outcomes |
|                 |        | radiation treatment; Prognosis: estimated 5 year survival of 0-50%; Mean age: 60 |                   | emotional, and spiritual |   |             |   | <p>p=0.4229); NS at week 27 (72.1 vs 72.1, p=0.9922)</p> <p><b>Symptom burden</b></p> <ul style="list-style-type: none"> <li>• [Linear Analog Scale Assessment (LASA): physical symptoms composite] 0.4 vs -10.0;; P =0.022</li> <li>• [Symptom Distress Scale] NS (data not reported)</li> </ul> <p><b>Mood</b></p> <ul style="list-style-type: none"> <li>• [Profile of Mood States] Improved tension/anxiety (not reported; P=0.042) and improved confusion/bewilderment (not reported; P=0.014) subscales at week 4</li> <li>• [LASA] Emotional well-being Improved (2.8 vs. -5.4; P=0.046) at week 4</li> </ul> <p><b>Caregiver QOL</b></p> <ul style="list-style-type: none"> <li>• [LASA]: NS at week 4 (mean,</li> </ul> |                     |                    |

**eTable 2. Trial Characteristics and Outcomes of 6 Palliative Care Interventions at Low Risk of Bias**

| Study (Country)                             | Design            | Patient Population                                                                                                   | Domains Addressed                                                 | Intervention                                                                                                                                                                                                     |     | Control     |     | Main Results                                                                                                                                                                                                                                                                                 | Risk of Bias        |                    |
|---------------------------------------------|-------------------|----------------------------------------------------------------------------------------------------------------------|-------------------------------------------------------------------|------------------------------------------------------------------------------------------------------------------------------------------------------------------------------------------------------------------|-----|-------------|-----|----------------------------------------------------------------------------------------------------------------------------------------------------------------------------------------------------------------------------------------------------------------------------------------------|---------------------|--------------------|
|                                             |                   |                                                                                                                      |                                                                   | Description                                                                                                                                                                                                      | n   | Description | n   |                                                                                                                                                                                                                                                                                              | Subjective Outcomes | Objective Outcomes |
|                                             |                   |                                                                                                                      |                                                                   |                                                                                                                                                                                                                  |     |             |     | 77.4 vs. 75.9; P=0.68); NS at week 8 (mean, 77.6 vs. 76.3; P=0.75); NS at week 27 (mean, 72.2 vs. 78.9; P=0.10)<br><b>Caregiver burden</b><br>• [Zarit]: NS at week 4 (mean, 76.9 vs. 76.2; P=0.81); NS at week 8 (mean, 75.1 vs. 75.8; P=0.80); NS at week 27 (mean, 75.1 vs. 77.2; P=0.55) |                     |                    |
| <b>Trials with cluster randomization</b>    |                   |                                                                                                                      |                                                                   |                                                                                                                                                                                                                  |     |             |     |                                                                                                                                                                                                                                                                                              |                     |                    |
| Zimmerman et al, 2014 <sup>3</sup> (Canada) | Cluster, parallel | Advanced cancer (lung, gastrointestinal, genitourinary, breast, gynecological); Prognosis: 6-24 months; Mean age: 61 | Structure, Physical, Psychological, Social, Spiritual, EOL, Legal | Specialist palliative care focusing on: comprehensive assessment of symptoms, psychosocial concerns, and home services; routine contact with palliative care nurse; monthly outpatient palliative care follow-up | 228 | Usual care  | 233 | <b>QOL</b><br>• [FACIT-Sp] <sup>a</sup> 3-month primary endpoint (ES, 0.26; P=0.07); 4 months (ES, 0.44; P=0.006);<br>• [QUAL-E] 3 months (ES, 0.28; P=0.05); 4 months (ES, 0.45; P=0.003)<br><b>Symptom burden</b><br>• [ESAS] 3 months (ES, -0.13; P=0.33); 4 months (ES, -0.31; P=0.05)   | Low                 | Low                |

**eTable 2. Trial Characteristics and Outcomes of 6 Palliative Care Interventions at Low Risk of Bias**

| Study (Country) | Design | Patient Population | Domains Addressed | Intervention                                                                                                                                                         |   | Control     |   | Main Results                                                                                                                                                                                                                             | Risk of Bias        |                    |
|-----------------|--------|--------------------|-------------------|----------------------------------------------------------------------------------------------------------------------------------------------------------------------|---|-------------|---|------------------------------------------------------------------------------------------------------------------------------------------------------------------------------------------------------------------------------------------|---------------------|--------------------|
|                 |        |                    |                   | Description                                                                                                                                                          | n | Description | n |                                                                                                                                                                                                                                          | Subjective Outcomes | Objective Outcomes |
|                 |        |                    |                   | visits; and, 24-hour on-call service. Ancillary services included: home care nursing, home palliative care, or inpatient admission for urgent needs or terminal care |   |             |   | <b>Satisfaction</b> <ul style="list-style-type: none"> <li>• [FAMCARE-P16] 3 months (ES, 0.47; P=0.0003); 4 months (ES, 0.73; P&lt;0.0001);</li> <li>• [CARES-MIS] 3 months (ES, -0.21; P=0.40); 4 months (ES, -0.24; P=0.11)</li> </ul> |                     |                    |

Legend:

<sup>a</sup> Primary outcome measure; otherwise, not defined in article.

ES, effect size. NS, not significant. d, Hedges' d. g, Hedges' g. h, Hedges' h. OR, odds ratio. CI, confidence interval. GI, gastrointestinal. GU, genitourinary. FACIT-Pal, Functional Assessment of Chronic Illness Therapy- Palliative Care. ESAS, Edmonton Symptom Assessment Scale. CESD, Center for Epidemiologic Studies Depression Scale. SE, Standard Error. ICU, Intensive Care Unit. ED, Emergency Department. MCB, Montgomery Borgatta Caregiver Burden scale. COPD, Chronic Obstructive Pulmonary Disease. QOL, Quality of Life. CHF, Congestive Heart Failure. EQ-5D, EuroQOL Five Dimensions Scale. NRS, Numerical Rating Scale. HADS, Hospital Anxiety and Depression Scale. HIV, Human immunodeficiency virus. MOS-HIV, Medical Outcomes Study HIV Health Survey. GHQ-12, 12 Item General Health Questionnaire. FACT-G, Functional Assessment of Cancer Therapy – General. SF-12, 12-Item Short Form Survey. EOL, end of life. FACIT-SP Functional Assessment of Chronic Illness Therapy – Spiritual Well-being. QUAL-E, Quality of Life at the End of Life. CARES-MIS, Cancer Rehabilitation Evaluation System Medical Interaction Subscale.

Structure, Structure and processes of care. Psychological, Psychological and psychiatric aspects of care. Social, Social aspects of care. Cultural, Cultural aspects of care. Spiritual, Spiritual, religious, and existential aspects of care. EOL, Care of the imminently dying patient. Legal, Ethical and legal aspects of care.

Note: Primary outcome reported, regardless of whether it is one of our pre-specified outcomes of interest. If no primary outcome specified in paper, and the outcome is not one of our outcomes of interest, it is not reported here. All comparisons are intervention versus control, if not otherwise specified. Ambulatory interventions refer to those interventions where patients were required to travel to either an outpatient clinic or an intervention delivery site. Subjective outcomes include all patient-reported outcomes (e.g., QOL, symptoms, mood), whereas objective outcomes include those outcomes which are not subject to detection bias (e.g., survival, healthcare utilization and expenditures abstracted from clinical or administrative records).

**eTable 3. Trial Characteristics and Outcomes of 26 Palliative Care Interventions at High Risk of Bias**

| Study (Country)                                | Design   | Patient Population                                                       | Domains Addressed                                            | Intervention                          |     | Control     |    | Main Results                                                                                                                                                                                                                                                                                                                                                                                                                                                                                                                                                           | Risk of Bias        |                    |
|------------------------------------------------|----------|--------------------------------------------------------------------------|--------------------------------------------------------------|---------------------------------------|-----|-------------|----|------------------------------------------------------------------------------------------------------------------------------------------------------------------------------------------------------------------------------------------------------------------------------------------------------------------------------------------------------------------------------------------------------------------------------------------------------------------------------------------------------------------------------------------------------------------------|---------------------|--------------------|
|                                                |          |                                                                          |                                                              | Description                           | n   | Description | n  |                                                                                                                                                                                                                                                                                                                                                                                                                                                                                                                                                                        | Subjective Outcomes | Objective Outcomes |
| <b>Trials with patient-level randomization</b> |          |                                                                          |                                                              |                                       |     |             |    |                                                                                                                                                                                                                                                                                                                                                                                                                                                                                                                                                                        |                     |                    |
| Aiken et al, 2006 <sup>11</sup> (USA)          | Parallel | Class IIIB-IV HF (68%) or COPD (32%); Prognosis: < 2 years; Mean age: 69 | Structure, Physical, Psychological, Social, Spiritual, Legal | Home-based, nurse-led care management | 101 | Usual care  | 91 | <b>Symptoms</b> <ul style="list-style-type: none"> <li>• [MSAS] Lower distress from most troublesome symptom among COPD patients at 6 months (g=0.60; P=0.07)</li> <li>• [MSAS] Distress from most troublesome symptom among CHF patients in intervention at 6 months (g=0.60; P&lt;0.05)</li> </ul> <b>Utilization</b> <ul style="list-style-type: none"> <li>• ED visits, NS (data not reported)</li> </ul> <b>Advance care planning</b> <ul style="list-style-type: none"> <li>• Possession of living will or advance directive (71% vs. 65%; P&lt;0.05)</li> </ul> | High                | High               |



**eTable 3. Trial Characteristics and Outcomes of 26 Palliative Care Interventions at High Risk of Bias**

| Study (Country)                         | Design            | Patient Population                                                                                                                                                  | Domains Addressed                                            | Intervention                                                                                                             |                             | Control                                       |                             | Main Results                                                                                                                                                                                                                                                                                                                                                                                                                                                                                                                                                      | Risk of Bias        |                    |
|-----------------------------------------|-------------------|---------------------------------------------------------------------------------------------------------------------------------------------------------------------|--------------------------------------------------------------|--------------------------------------------------------------------------------------------------------------------------|-----------------------------|-----------------------------------------------|-----------------------------|-------------------------------------------------------------------------------------------------------------------------------------------------------------------------------------------------------------------------------------------------------------------------------------------------------------------------------------------------------------------------------------------------------------------------------------------------------------------------------------------------------------------------------------------------------------------|---------------------|--------------------|
|                                         |                   |                                                                                                                                                                     |                                                              | Description                                                                                                              | n                           | Description                                   | n                           |                                                                                                                                                                                                                                                                                                                                                                                                                                                                                                                                                                   | Subjective Outcomes | Objective Outcomes |
| Bakitas et al, 2015 <sup>12</sup> (USA) | Waitlist parallel | Advanced solid or hematologic cancer (lung, GI tract, breast, other solid tumor, genitourinary tract, hematologic malignancy); Prognosis: 6-24 months; Mean age: 64 | Structure, Physical, Psychological, Social, Spiritual, Legal | Early delivery (30-60 days post diagnosis) of Bakitas et al, 2009 intervention plus life-review and caregiver components | 104 patients, 61 caregivers | Delayed intervention, 3 months post diagnosis | 103 patients, 61 caregivers | <b>QOL</b> <ul style="list-style-type: none"> <li>• [FACIT-Pal]: 3 months, mean, 129.9 (95% CI, 126.6 to 133.3) vs. 127.2 (95% CI, 124.1 to 130.3); overall P=0.34</li> <li>• [TOI]: 3 months, mean, 99.5 (95% CI, 96.5 to 102.4) vs. 97.7 (95% CI, 94.9 to 100.5); overall P=0.24</li> </ul> <b>Symptom burden</b> <ul style="list-style-type: none"> <li>• [QUAL-E]: 3 months, mean, 11.4 (95% CI, 10.8 to 12.1) vs. 12.2 (95% CI, 11.6 to 12.8); overall P=0.09</li> </ul> <b>Survival</b> <ul style="list-style-type: none"> <li>• 1-year survival</li> </ul> | High                | High               |

**eTable 3. Trial Characteristics and Outcomes of 26 Palliative Care Interventions at High Risk of Bias**

| Study (Country) | Design | Patient Population | Domains Addressed | Intervention |   | Control     |   | Main Results                                                                                                                                                                                                                                                                                  | Risk of Bias        |                    |
|-----------------|--------|--------------------|-------------------|--------------|---|-------------|---|-----------------------------------------------------------------------------------------------------------------------------------------------------------------------------------------------------------------------------------------------------------------------------------------------|---------------------|--------------------|
|                 |        |                    |                   | Description  | n | Description | n |                                                                                                                                                                                                                                                                                               | Subjective Outcomes | Objective Outcomes |
|                 |        |                    |                   |              |   |             |   | among early vs. delayed groups (63% vs. 48%; P=0.038); Overall median survival, 18.3 months vs. 11.8 months (P=0.18)                                                                                                                                                                          |                     |                    |
|                 |        |                    |                   |              |   |             |   | <b>Mood</b> <ul style="list-style-type: none"> <li>• [CES-D]: 3 months, 11.2 (95% CI, 9.7 to 12.7) vs. 10.8 (95% CI, 9.5 to 12.1); overall P=0.33</li> </ul>                                                                                                                                  |                     |                    |
|                 |        |                    |                   |              |   |             |   | <b>Utilization</b> <ul style="list-style-type: none"> <li>• Hospital days, RR, 0.73 (95% CI, 0.41 to 1.27); P=0.26;</li> <li>• ICU days, RR, 0.68 (95% CI, 0.23 to 2.02); P=0.49;</li> <li>• ED visits, RR, 0.73 (95% CI, 0.45 to 1.19); P=0.21;</li> <li>• Chemotherapy in last 2</li> </ul> |                     |                    |

**eTable 3. Trial Characteristics and Outcomes of 26 Palliative Care Interventions at High Risk of Bias**

| Study (Country) | Design | Patient Population | Domains Addressed | Intervention |   | Control     |   | Main Results                                                                                                                                                                                                                                                                                                                                                                                                                            | Risk of Bias        |                    |
|-----------------|--------|--------------------|-------------------|--------------|---|-------------|---|-----------------------------------------------------------------------------------------------------------------------------------------------------------------------------------------------------------------------------------------------------------------------------------------------------------------------------------------------------------------------------------------------------------------------------------------|---------------------|--------------------|
|                 |        |                    |                   | Description  | n | Description | n |                                                                                                                                                                                                                                                                                                                                                                                                                                         | Subjective Outcomes | Objective Outcomes |
|                 |        |                    |                   |              |   |             |   | weeks of life, RR, 1.57 (95% CI, 0.37 to 6.7); P=0.54<br>• Hospice use, RR, 1.08 (95% CI, 0.8 to 1.45); P=0.62.<br><b>Site of death</b><br>• At-home death, 54% vs. 47% (P=0.60)<br><b>Caregiver QOL</b><br>• [CQOL-C]: 3 months, $d=-0.13$ (P=0.37)<br><b>Caregiver burden</b><br>• [MBCB]: Objective burden ( $d=0.09$ ; P=0.62); Demand burden ( $d=0$ ; P=0.99); Stress burden 36 weeks prior to patient death ( $d=0.44$ , P=0.01) |                     |                    |

**eTable 3. Trial Characteristics and Outcomes of 26 Palliative Care Interventions at High Risk of Bias**

| Study (Country)                               | Design   | Patient Population                 | Domains Addressed                                     | Intervention                                                                                                   |    | Control     |    | Main Results                                                                                                                                                                                                                                                                                                                                                                                                                                                    | Risk of Bias        |                    |
|-----------------------------------------------|----------|------------------------------------|-------------------------------------------------------|----------------------------------------------------------------------------------------------------------------|----|-------------|----|-----------------------------------------------------------------------------------------------------------------------------------------------------------------------------------------------------------------------------------------------------------------------------------------------------------------------------------------------------------------------------------------------------------------------------------------------------------------|---------------------|--------------------|
|                                               |          |                                    |                                                       | Description                                                                                                    | n  | Description | n  |                                                                                                                                                                                                                                                                                                                                                                                                                                                                 | Subjective Outcomes | Objective Outcomes |
|                                               |          |                                    |                                                       |                                                                                                                |    |             |    | <b>Caregiver mood<sup>13</sup></b> <ul style="list-style-type: none"> <li>• [CES-D]: Depressive symptoms at 3 months, <math>d=-0.32</math> (<math>P=0.02</math>); 36 weeks prior to patient death, <math>d=-0.39</math> (<math>P=.02</math>); 8-12 weeks among caregivers of decedents, <math>d=0.07</math> (<math>P=0.07</math>)</li> <li>• [PG13]: Complicated grief at 8-12 weeks post patient death, <math>d=-0.21</math> (<math>P=0.51</math>).</li> </ul> |                     |                    |
| Brännström et al, 2014 <sup>14</sup> (Sweden) | Parallel | NYHA Class III-IV HF; Mean age: 79 | Structure, Physical, Psychological, Social, Spiritual | Multidisciplinary, home-based collaborative care to provide HF disease management and palliative care services | 36 | Usual care  | 36 | <b>QOL</b> <ul style="list-style-type: none"> <li>• [EQ5D]<sup>a</sup> Improved (<math>57.6 \pm 19.2</math> vs. <math>48.5 \pm 24.4</math>; <math>P=0.05</math>)</li> <li>• [KCCQ]<sup>a</sup> NS, data not reported</li> </ul> <b>Symptom burden</b>                                                                                                                                                                                                           | High                | High               |

**eTable 3. Trial Characteristics and Outcomes of 26 Palliative Care Interventions at High Risk of Bias**

| Study (Country)                         | Design            | Patient Population                                     | Domains Addressed                  | Intervention                                                                                              |    | Control                        |    | Main Results                                                                                                                                                                                                                                                                                                                                                                                                                                                                                                                                                                                                                                                                                                      | Risk of Bias        |                    |
|-----------------------------------------|-------------------|--------------------------------------------------------|------------------------------------|-----------------------------------------------------------------------------------------------------------|----|--------------------------------|----|-------------------------------------------------------------------------------------------------------------------------------------------------------------------------------------------------------------------------------------------------------------------------------------------------------------------------------------------------------------------------------------------------------------------------------------------------------------------------------------------------------------------------------------------------------------------------------------------------------------------------------------------------------------------------------------------------------------------|---------------------|--------------------|
|                                         |                   |                                                        |                                    | Description                                                                                               | n  | Description                    | n  |                                                                                                                                                                                                                                                                                                                                                                                                                                                                                                                                                                                                                                                                                                                   | Subjective Outcomes | Objective Outcomes |
|                                         |                   |                                                        |                                    |                                                                                                           |    |                                |    | <ul style="list-style-type: none"> <li>• [ESAS]<sup>a</sup> NS, data not reported</li> </ul> <b>Survival</b> <ul style="list-style-type: none"> <li>• Six-month mortality NS, <math>P=0.34</math></li> </ul> <b>Utilization</b> <ul style="list-style-type: none"> <li>• Fewer hospitalizations, mean (SD)=0.42 (0.60) vs. 1.47 (1.81); <math>P=0.009</math></li> </ul> <b>Expenditures<sup>1</sup></b> <ul style="list-style-type: none"> <li>• Total costs NS, €4078 vs. €5727 (<math>P</math> not reported)</li> </ul> <b>Other</b> <ul style="list-style-type: none"> <li>• [NYHA class]<sup>a</sup>: Increased proportion of patients with improved NYHA class (39% vs. 9%; <math>P=0.015</math>)</li> </ul> |                     |                    |
| Chapman et al, 2007 <sup>16</sup> (USA) | Partial crossover | Advanced dementia nursing home residents; Mean age: 86 | Structure, Physical, Psychological | Multidisciplinary Advanced Illness Care Teams (AICT) that focused on medical issues, meaningful activity, | 57 | Delayed intervention (8 weeks) | 61 | <b>Symptom burden</b> <ul style="list-style-type: none"> <li>• [Faces Legs Activity Cry Consolability Behavioral Pain Scale] Pain NS,</li> </ul>                                                                                                                                                                                                                                                                                                                                                                                                                                                                                                                                                                  | High                | N/A                |

**eTable 3. Trial Characteristics and Outcomes of 26 Palliative Care Interventions at High Risk of Bias**

| Study (Country)                                           | Design   | Patient Population                                                                                                                            | Domains Addressed                               | Intervention                                                                |    | Control     |    | Main Results                                                                                                                                                                                                                                                       | Risk of Bias        |                    |
|-----------------------------------------------------------|----------|-----------------------------------------------------------------------------------------------------------------------------------------------|-------------------------------------------------|-----------------------------------------------------------------------------|----|-------------|----|--------------------------------------------------------------------------------------------------------------------------------------------------------------------------------------------------------------------------------------------------------------------|---------------------|--------------------|
|                                                           |          |                                                                                                                                               |                                                 | Description                                                                 | n  | Description | n  |                                                                                                                                                                                                                                                                    | Subjective Outcomes | Objective Outcomes |
|                                                           |          |                                                                                                                                               |                                                 | psychosocial problems, and behavioral concerns                              |    |             |    | mean 0.24 vs 0.30, <i>P</i> not reported<br>• [Pain in Advanced Dementia] Pain NS, mean 1.29 vs. 1.55, <i>P</i> not reported<br><b>Mood</b><br>• [Cornell Scale for Depression in Dementia] Depression NS, mean 0.09 vs. 0.07, <i>P</i> not reported               |                     |                    |
| Cheung et al, 2010 <sup>17</sup> (Australia) <sup>b</sup> | Parallel | ICU inpatients (e.g. cardiovascular, gastroenterology, neurology, respiratory, sepsis, trauma and other); Prognosis: ≥ 6 months; Mean age: 77 | Structure, Physical, Psychological, Social, EOL | Inpatient specialist palliative care consultation and management in the ICU | 10 | Usual care  | 10 | <b>Utilization</b> <sup>a</sup><br>• Median ICU LOS, days, 3 [IQR, 7] vs. 5 [8]; <i>P</i> =0.97<br>• Median hospital LOS, days, 5[8] vs. 11[27]; <i>P</i> =0.44<br><b>Site of death</b><br>• ICU mortality, 50% vs. 60%; <i>P</i> >0.99<br>Hospital mortality, 90% | High                | High               |

**eTable 3. Trial Characteristics and Outcomes of 26 Palliative Care Interventions at High Risk of Bias**

| Study (Country)                       | Design   | Patient Population                                                                                                                             | Domains Addressed                                     | Intervention                                                                                                                                                                                     |                            | Control     |                            | Main Results                                                                                                                                                                                                                                                                                                                                                                                                 | Risk of Bias        |                    |
|---------------------------------------|----------|------------------------------------------------------------------------------------------------------------------------------------------------|-------------------------------------------------------|--------------------------------------------------------------------------------------------------------------------------------------------------------------------------------------------------|----------------------------|-------------|----------------------------|--------------------------------------------------------------------------------------------------------------------------------------------------------------------------------------------------------------------------------------------------------------------------------------------------------------------------------------------------------------------------------------------------------------|---------------------|--------------------|
|                                       |          |                                                                                                                                                |                                                       | Description                                                                                                                                                                                      | n                          | Description | n                          |                                                                                                                                                                                                                                                                                                                                                                                                              | Subjective Outcomes | Objective Outcomes |
|                                       |          |                                                                                                                                                |                                                       |                                                                                                                                                                                                  |                            |             |                            | vs. 70%;<br>P=0.58<br><b>Satisfaction</b> <sup>a c</sup><br>• Family,<br>P=0.56                                                                                                                                                                                                                                                                                                                              |                     |                    |
| Clark et al, 2013 <sup>18</sup> (USA) | Parallel | Advanced cancer (brain, gastrointestinal, head and neck, lung, other) undergoing radiation treatment; Prognosis: 0-50% @ 5 years; Mean age: 59 | Structure, Physical, Psychological, Social, Spiritual | Structured, multidisciplinary nurse-led patient/caregiver intervention to address physical, mental, social, emotional, and spiritual QOL, plus 10 brief individual telephone counseling sessions | 65 patients, 65 caregivers | Usual care  | 66 patients, 66 caregivers | <b>QOL</b><br>• [FACT-G] <sup>a</sup> : Improved (mean, 74.2 vs. 68.7; P=0.02) at week 4; NS (mean, 77.6 vs. 77.7; P=0.88) at week 27<br><b>Mood</b><br>• [POMS]: NS (data not reported)<br><b>Caregiver QOL</b><br>• [Caregiver QOL Index-Cancer]: NS at week 4 (58.0 vs. 57.7; P not reported); NS at week 27 (58.5 vs. 59.1; P not reported)<br><b>Caregiver mood</b><br>• [POMS]: NS (data not reported) | High                | N/A                |

**eTable 3. Trial Characteristics and Outcomes of 26 Palliative Care Interventions at High Risk of Bias**

| Study (Country)                                   | Design   | Patient Population                                                                                                        | Domains Addressed                                      | Intervention                                                                                                                                                                                     |    | Control     |    | Main Results                                                                                                                                                                                                                                                                                                                                                                                                                                                                                                             | Risk of Bias        |                    |
|---------------------------------------------------|----------|---------------------------------------------------------------------------------------------------------------------------|--------------------------------------------------------|--------------------------------------------------------------------------------------------------------------------------------------------------------------------------------------------------|----|-------------|----|--------------------------------------------------------------------------------------------------------------------------------------------------------------------------------------------------------------------------------------------------------------------------------------------------------------------------------------------------------------------------------------------------------------------------------------------------------------------------------------------------------------------------|---------------------|--------------------|
|                                                   |          |                                                                                                                           |                                                        | Description                                                                                                                                                                                      | n  | Description | n  |                                                                                                                                                                                                                                                                                                                                                                                                                                                                                                                          | Subjective Outcomes | Objective Outcomes |
| Dyar et al, 2012 <sup>19</sup> (USA) <sup>d</sup> | Parallel | Metastatic cancer (breast, lung, prostate, other) with expectation of hospice referral within upcoming year; Mean age: 66 | Physical, Psychological, Social, Spiritual, EOL, Legal | Two consultations with an oncology advanced registered nurse practitioner to provide education regarding hospice, facilitate advance care planning, and conduct a comprehensive needs assessment | 12 | Usual care  | 14 | <b>QOL</b> <ul style="list-style-type: none"> <li>• [FACT-G Physical] 1 month (mean change, 0.3 vs. -0.4; P=0.93)</li> <li>• [FACT-G Family/social ] 1 month (0.4 vs. 0.8; P=0.32)</li> <li>• [FACT-G Emotional] Improved at 1 month (1.2 vs. -4.5; P=0.01)</li> <li>• [FACT-G Functional] 1 month (-0.8 vs. 0.8; P=0.77)</li> <li>• [FACT-G Total] 1 month (1.2 vs. -3.9; P=0.31)</li> <li>• [LASA Overall QOL] 1 month (2.0 vs. -8.8; P=0.28)</li> <li>• [LASA Mental QOL] 1 month improved(19.0 vs. -10.0;</li> </ul> | High                | N/A                |



**eTable 3. Trial Characteristics and Outcomes of 26 Palliative Care Interventions at High Risk of Bias**

| Study (Country)                            | Design   | Patient Population                                                                                                                                                                                                    | Domains Addressed                                  | Intervention                                                                                                                                                                        |     | Control     |     | Main Results                                                                                                                                                                                                                                            | Risk of Bias        |                    |
|--------------------------------------------|----------|-----------------------------------------------------------------------------------------------------------------------------------------------------------------------------------------------------------------------|----------------------------------------------------|-------------------------------------------------------------------------------------------------------------------------------------------------------------------------------------|-----|-------------|-----|---------------------------------------------------------------------------------------------------------------------------------------------------------------------------------------------------------------------------------------------------------|---------------------|--------------------|
|                                            |          |                                                                                                                                                                                                                       |                                                    | Description                                                                                                                                                                         | n   | Description | n   |                                                                                                                                                                                                                                                         | Subjective Outcomes | Objective Outcomes |
|                                            |          |                                                                                                                                                                                                                       |                                                    |                                                                                                                                                                                     |     |             |     | P=0.02)<br>• [LASA physical] 1 month (7.0 vs. 3.8; P=0.89)<br><b>Symptom burden</b><br>• [LASA pain frequency] 1 month (-5.0 vs 7.5; P=0.38)<br>• [LASA mean pain] 1 month (7.0 vs. 6.3; P=0.89)<br>• [LASA mean fatigue] 1 month (0.0 vs -8.6; P=0.32) |                     |                    |
| Engelhardt et al, 2006 <sup>20</sup> (USA) | Parallel | Advanced cancer (esophagus, trachea, colon, liver, pancreas, lung, uterus, prostate, breast, melanoma, leukemia, lymphosarcoma, Hodgkin's disease, multiple myeloma) (65%), or COPD (19%) or CHF (16%) and either ICU | Structure, Psychological, Social, Spiritual, Legal | Six-session care coordination and education intervention to improve patient-provider communication regarding advanced illness, and to alleviate barriers to palliative/hospice care | 133 | Usual care  | 142 | <b>Survival</b><br>• NS at 18 months, 43% vs. 42% (P not reported)<br><b>Advance care planning</b><br>• Median time to documentation (46 vs. 238 days; P=0.02)<br><b>Satisfaction</b> <sup>e</sup><br>• Improved                                        | High                | High               |

**eTable 3. Trial Characteristics and Outcomes of 26 Palliative Care Interventions at High Risk of Bias**

| Study (Country)                         | Design             | Patient Population                                                                                                                                                                             | Domains Addressed                          | Intervention                                     |    | Control                                       |    | Main Results                                                                                                                                                                                                                                                                         | Risk of Bias        |                    |
|-----------------------------------------|--------------------|------------------------------------------------------------------------------------------------------------------------------------------------------------------------------------------------|--------------------------------------------|--------------------------------------------------|----|-----------------------------------------------|----|--------------------------------------------------------------------------------------------------------------------------------------------------------------------------------------------------------------------------------------------------------------------------------------|---------------------|--------------------|
|                                         |                    |                                                                                                                                                                                                |                                            | Description                                      | n  | Description                                   | n  |                                                                                                                                                                                                                                                                                      | Subjective Outcomes | Objective Outcomes |
|                                         |                    | admission or 2+ hospital admissions in past 6 months; Mean age: 71                                                                                                                             |                                            |                                                  |    |                                               |    | (ES, 0.18; P=0.03)<br><b>Expenditures</b><br>• Costs at 6-months NS, (ES, 0.18; P=0.29)<br><b>Caregiver satisfaction</b><br>• [Modified EOL Family Interview]: Improved (ES, 0.39; P=0.03)                                                                                           |                     |                    |
| Farquhar et al, 2014 <sup>21</sup> (UK) | Parallel, waitlist | Advanced cancer (lung, breast, rectal, prostate, lymphoma, mesothelioma, gastro-esophageal, renal, endometrial, hepatocellular, bladder, unknown) and symptomatic breathlessness; Mean age: 69 | Structure, Physical, Psychological, Social | Multidisciplinary breathlessness support service | 35 | Usual care until two weeks, then intervention | 32 | <b>Symptom burden</b><br>• [NRS] <sup>a</sup> : Decreased breathlessness distress (adjusted difference, -1.29; [95% CI: -2.57 to -0.005]; P=0.049)<br><b>Mood</b><br>• [HADS]: Anxiety NS (adjusted difference, 0.017; [95% CI: -1.52 to 1.56]; P=0.98)<br>• Depression NS (adjusted | High                | High               |

**eTable 3. Trial Characteristics and Outcomes of 26 Palliative Care Interventions at High Risk of Bias**

| Study (Country)                         | Design             | Patient Population                                                                                     | Domains Addressed                          | Intervention                                     |    | Control                                       |    | Main Results                                                                                                                                                                                                                                                           | Risk of Bias        |                    |
|-----------------------------------------|--------------------|--------------------------------------------------------------------------------------------------------|--------------------------------------------|--------------------------------------------------|----|-----------------------------------------------|----|------------------------------------------------------------------------------------------------------------------------------------------------------------------------------------------------------------------------------------------------------------------------|---------------------|--------------------|
|                                         |                    |                                                                                                        |                                            | Description                                      | n  | Description                                   | n  |                                                                                                                                                                                                                                                                        | Subjective Outcomes | Objective Outcomes |
|                                         |                    |                                                                                                        |                                            |                                                  |    |                                               |    | difference, -0.30; [95% CI: -1.79 to 1.20]; P=0.69)<br><b>Expenditures</b><br>• [total costs, including informal care]: NS (difference, -£354 [95% CI: -£1020 to £246])                                                                                                |                     |                    |
| Farquhar et al, 2016 <sup>22</sup> (UK) | Parallel, waitlist | Non-malignant disease and symptomatic breathlessness (83% COPD, 17% other not specified); Mean age: 72 | Structure, Physical, Psychological, Social | Multidisciplinary breathlessness support service | 44 | Usual care until two weeks, then intervention | 43 | <b>Symptom burden</b><br>• [NRS]: Breathlessness distress, adjusted difference, -0.24; [95% CI: -1.30 to 0.82]; P=0.65<br><b>Mood</b><br>• [HADS]: Anxiety (adjusted difference, -0.76 [95% CI: -1.95 to 0.44]; P=0.21)<br>• [HADS] Depression (adjusted difference, - | High                | High               |

**eTable 3. Trial Characteristics and Outcomes of 26 Palliative Care Interventions at High Risk of Bias**

| Study (Country)                          | Design   | Patient Population                                                                        | Domains Addressed        | Intervention                                                                                                                                     |     | Control     |    | Main Results                                                                                                                                                                                                                             | Risk of Bias        |                    |
|------------------------------------------|----------|-------------------------------------------------------------------------------------------|--------------------------|--------------------------------------------------------------------------------------------------------------------------------------------------|-----|-------------|----|------------------------------------------------------------------------------------------------------------------------------------------------------------------------------------------------------------------------------------------|---------------------|--------------------|
|                                          |          |                                                                                           |                          | Description                                                                                                                                      | n   | Description | n  |                                                                                                                                                                                                                                          | Subjective Outcomes | Objective Outcomes |
|                                          |          |                                                                                           |                          |                                                                                                                                                  |     |             |    | 0.61 [95% CI: -1.76 to 0.54]; P=0.29)<br><b>Expenditures</b><br>• Inpatient costs, difference, £799 [95% CI: -£237 to £1904])                                                                                                            |                     |                    |
| Given et al, 2002 <sup>20</sup> (USA)    | Parallel | Newly diagnosed cancer (breast, colon, lung, gynecologic, lymphoma); Mean age: 58         | Physical, Social         | Protocolized cognitive-behavioral pain and fatigue management intervention delivered by oncology nurses using computerized decision support tool | 53  | Usual care  | 60 | <b>QOL</b><br>• [SF-36: physical]: 20 weeks (data not reported; P=0.05)<br>• [SF-36: social function] 20 weeks (data not reported; P=0.07)<br><b>Symptom burden</b><br>• [Symptom Experience Scale] 20 weeks (data not reported; P=0.05) | High                | N/A                |
| Grande et al, 1999 <sup>23,24</sup> (UK) | Parallel | Cancer (gastrointestinal, genitourinary, breast, lung) (82%), AIDS, motor neuron disease; | Structure, Physical, EOL | Hospital at home: Around-the-clock practical nursing care provided at the patient's home for up to 2 weeks                                       | 186 | Usual care  | 43 | <b>Utilization</b><br>• GP evening home visits in penultimate week, mean 0.17 vs. 0.61                                                                                                                                                   | High                | High               |

**eTable 3. Trial Characteristics and Outcomes of 26 Palliative Care Interventions at High Risk of Bias**

| Study (Country) | Design | Patient Population                | Domains Addressed | Intervention |   | Control     |   | Main Results                                                                                                                                                                                                                                                                                                                                                                                                                                                 | Risk of Bias        |                    |
|-----------------|--------|-----------------------------------|-------------------|--------------|---|-------------|---|--------------------------------------------------------------------------------------------------------------------------------------------------------------------------------------------------------------------------------------------------------------------------------------------------------------------------------------------------------------------------------------------------------------------------------------------------------------|---------------------|--------------------|
|                 |        |                                   |                   | Description  | n | Description | n |                                                                                                                                                                                                                                                                                                                                                                                                                                                              | Subjective Outcomes | Objective Outcomes |
|                 |        | Prognosis: < 2 weeks; Mean age:72 |                   |              |   |             |   | (P=0.022)<br>• GP night visits (mean, 0.04 vs. 0.26; P=0.0003)<br>• GP visits during the week (mean 2.18 vs. 2.32; p>0.05)<br>• Daytime GP visits during the weekend (mean 0.35 vs 0.39; p>0.05)<br>• GP evening home visits in final week (mean 0.59 vs. 1.11; P>0.05)<br>• GP night visits (mean, 0.47 vs. 0.63; p>0.05)<br>• Daytime GP visits during the week (mean 2.92 vs. 3.03; p>0.05)<br>• GP daytime visits during the weekend (mean 0.95 vs 0.63; |                     |                    |

**eTable 3. Trial Characteristics and Outcomes of 26 Palliative Care Interventions at High Risk of Bias**

| Study (Country)                        | Design   | Patient Population                                                                                     | Domains Addressed                                            | Intervention                                                                                                                                                      |    | Control     |    | Main Results                                                                                                                                                                                | Risk of Bias        |                    |
|----------------------------------------|----------|--------------------------------------------------------------------------------------------------------|--------------------------------------------------------------|-------------------------------------------------------------------------------------------------------------------------------------------------------------------|----|-------------|----|---------------------------------------------------------------------------------------------------------------------------------------------------------------------------------------------|---------------------|--------------------|
|                                        |          |                                                                                                        |                                                              | Description                                                                                                                                                       | n  | Description | n  |                                                                                                                                                                                             | Subjective Outcomes | Objective Outcomes |
|                                        |          |                                                                                                        |                                                              |                                                                                                                                                                   |    |             |    | p>0.05)<br><b>Site of death</b> <sup>a</sup><br>• Likelihood of dying at home 58% vs. 67%; P=0.29                                                                                           |                     |                    |
| Hopp et al, 2016 <sup>25</sup> (USA)   | Parallel | Inpatients with advanced HF (NYHA class III-IV)<br>Prognosis: 1-year mortality risk ≥33%; Mean age: 68 | Structure, Physical, Psychological, Social, Spiritual, Legal | Inpatient specialist palliative care consultation with physician and advance nurse practitioner (≥1 visit). Chaplaincy and social work involvement, as requested. | 43 | Usual care  | 42 | <b>Utilization and/or advance care planning</b><br>• Composite outcome of hospice utilization or DNR order creation by 6 months, NS, difference 9.3% (95% CI, -11.8%, 30.0%); P=0.12        | N/A                 | High               |
| Hughes et al, 1992 <sup>26</sup> (USA) | Parallel | Terminal illness (89% cancer (types not specified)); Prognosis: < 6 months; Mean age: 65               | Structure, Physical, Social, EOL                             | Interdisciplinary home-based primary care team                                                                                                                    | 86 | Usual care  | 85 | <b>Survival:</b><br>• NS (mean days [SD], 76.2 [67.1] vs. 83.1 [68.1]; P value not reported)<br><b>Utilization:</b><br>• Decreased VA hospital days (9.94 vs. 15.86, p=0.03)<br>• Decreased | High                | High               |

**eTable 3. Trial Characteristics and Outcomes of 26 Palliative Care Interventions at High Risk of Bias**

| Study (Country) | Design | Patient Population | Domains Addressed | Intervention |   | Control     |   | Main Results                                                                                                                                                                                                                                                                                                                                                                                                                                                             | Risk of Bias        |                    |
|-----------------|--------|--------------------|-------------------|--------------|---|-------------|---|--------------------------------------------------------------------------------------------------------------------------------------------------------------------------------------------------------------------------------------------------------------------------------------------------------------------------------------------------------------------------------------------------------------------------------------------------------------------------|---------------------|--------------------|
|                 |        |                    |                   | Description  | n | Description | n |                                                                                                                                                                                                                                                                                                                                                                                                                                                                          | Subjective Outcomes | Objective Outcomes |
|                 |        |                    |                   |              |   |             |   | outpatient clinic visits (0.73 vs. 2.59; p=0.01)<br>• Increased home nursing visits among intervention group (17.9 vs. 7.1; p=0.001)<br><b>Satisfaction</b><br>• [Greer Satisfaction with Care Survey]: Improved at one month (P=0.02)<br><b>Expenditures:</b><br>• Decreased VA hospital costs by 47% per capita (P=0.02)<br>• Overall total per capita costs NS (\$3,479.36U SD vs. \$4,248.68US D; P value not reported)<br><b>Caregiver satisfaction</b><br>• [Greer |                     |                    |

**eTable 3. Trial Characteristics and Outcomes of 26 Palliative Care Interventions at High Risk of Bias**

| Study (Country)                           | Design              | Patient Population                                          | Domains Addressed                          | Intervention                                                                                                                                                                                                                                                                                                                                                                                                    |                            | Control                                                               |                          | Main Results                                                                                                                                                                                                                                                                                                                                                                                                                                                                                               | Risk of Bias        |                    |
|-------------------------------------------|---------------------|-------------------------------------------------------------|--------------------------------------------|-----------------------------------------------------------------------------------------------------------------------------------------------------------------------------------------------------------------------------------------------------------------------------------------------------------------------------------------------------------------------------------------------------------------|----------------------------|-----------------------------------------------------------------------|--------------------------|------------------------------------------------------------------------------------------------------------------------------------------------------------------------------------------------------------------------------------------------------------------------------------------------------------------------------------------------------------------------------------------------------------------------------------------------------------------------------------------------------------|---------------------|--------------------|
|                                           |                     |                                                             |                                            | Description                                                                                                                                                                                                                                                                                                                                                                                                     | n                          | Description                                                           | n                        |                                                                                                                                                                                                                                                                                                                                                                                                                                                                                                            | Subjective Outcomes | Objective Outcomes |
|                                           |                     |                                                             |                                            |                                                                                                                                                                                                                                                                                                                                                                                                                 |                            |                                                                       |                          | Satisfaction with Care Survey]: Improved at one month (P=0.005)                                                                                                                                                                                                                                                                                                                                                                                                                                            |                     |                    |
| McCorkle et al, 1989 <sup>27</sup> (USA)  | Three-arm, parallel | Homebound patients with ≥ Stage 2 lung cancer; Mean age: 64 | Structure, Physical, Psychological, Social | Intervention 1: Specialized oncology home care (OHC) program delivered by masters-prepared nurses with advanced training in symptom management, psychosocial assessment, and communication; Intervention 2: Standard home care (SHC) program delivered by interdisciplinary team of registered nurses, physical therapists, home health aides, social workers, occupational therapists, and speech pathologists | Overall=166 <sup>f</sup>   | Usual care provided by patient's physicians without home nursing care | Overall=166 <sup>f</sup> | <b>Symptom burden</b> <ul style="list-style-type: none"> <li>• [Symptom Distress Scale]: Improved in both intervention conditions, data not reported (P=0.03)</li> </ul> <b>Mood</b> <ul style="list-style-type: none"> <li>• [POMS]: NS, P not reported</li> </ul> <b>Utilization:</b> <ul style="list-style-type: none"> <li>• Hospitalizations NS, P not reported</li> </ul> <b>Pain</b> <ul style="list-style-type: none"> <li>• [McGill-Melzack Pain Questionnaire]: NS, data not reported</li> </ul> | High                | High               |
| Northouse et al, 2005 <sup>28</sup> (USA) | Parallel            | Recurrent breast cancer; Prognosis: ≥ 6 months; Mean        | Physical, Psychological, Social            | Standardized, family-based intervention to provide in-home                                                                                                                                                                                                                                                                                                                                                      | 94 patients, 94 caregivers | Usual care                                                            | 88 patients, 88          | <b>QOL</b> <ul style="list-style-type: none"> <li>• [FACT-B and SF-36 composite:</li> </ul>                                                                                                                                                                                                                                                                                                                                                                                                                | High                | N/A                |



**eTable 3. Trial Characteristics and Outcomes of 26 Palliative Care Interventions at High Risk of Bias**

| Study (Country) | Design | Patient Population | Domains Addressed | Intervention                                                                                                                                                      |      | Control     |                | Main Results                                                                                                                                                                                                                                                                                                                                                                                                                                                                                                          | Risk of Bias        |                    |
|-----------------|--------|--------------------|-------------------|-------------------------------------------------------------------------------------------------------------------------------------------------------------------|------|-------------|----------------|-----------------------------------------------------------------------------------------------------------------------------------------------------------------------------------------------------------------------------------------------------------------------------------------------------------------------------------------------------------------------------------------------------------------------------------------------------------------------------------------------------------------------|---------------------|--------------------|
|                 |        |                    |                   | Description                                                                                                                                                       | n    | Description | n              |                                                                                                                                                                                                                                                                                                                                                                                                                                                                                                                       | Subjective Outcomes | Objective Outcomes |
|                 |        | age: 54            |                   | and telephone support and education in five domains: Family involvement, Optimistic attitude, Coping effectiveness, Uncertainty reduction, and Symptom management | vers |             | care - give rs | physical]: change from baseline to 3 months (P=0.48); change from 3 months to 6 months (P=0.19) <ul style="list-style-type: none"> <li>[FACT-B and SF-36 composite mental]: change from baseline to 3 months (P=0.92); change from 3 months to 6 months (P=0.79);</li> </ul> <b>Caregiver QOL</b> <ul style="list-style-type: none"> <li>[FACT-G and SF-36 composite: physical]: change from baseline to 3 months (P=0.91); change from 3 months to 6 months (P=0.48)</li> <li>[FACT-G and SF-36 composite</li> </ul> |                     |                    |

**eTable 3. Trial Characteristics and Outcomes of 26 Palliative Care Interventions at High Risk of Bias**

| Study (Country)                          | Design   | Patient Population                                                                                                      | Domains Addressed                                    | Intervention                                                                                                                                                                                            |    | Control                                                                                   |    | Main Results                                                                                                                                                                                                                                                             | Risk of Bias        |                    |
|------------------------------------------|----------|-------------------------------------------------------------------------------------------------------------------------|------------------------------------------------------|---------------------------------------------------------------------------------------------------------------------------------------------------------------------------------------------------------|----|-------------------------------------------------------------------------------------------|----|--------------------------------------------------------------------------------------------------------------------------------------------------------------------------------------------------------------------------------------------------------------------------|---------------------|--------------------|
|                                          |          |                                                                                                                         |                                                      | Description                                                                                                                                                                                             | n  | Description                                                                               | n  |                                                                                                                                                                                                                                                                          | Subjective Outcomes | Objective Outcomes |
|                                          |          |                                                                                                                         |                                                      |                                                                                                                                                                                                         |    |                                                                                           |    | mental]:<br>change from baseline to 3 months (P=0.81);<br>change from 3 months to 6 months (P=0.57)<br><b>Caregiver burden</b><br>• [Negative Appraisal of Caregiving Scale]:<br>change from baseline to 3 months (P=0.04);<br>change from 3 months to 6 months (P=0.37) |                     |                    |
| Pantilat et al, 2010 <sup>29</sup> (USA) | Parallel | Hospitalized elderly with HF (51%), cancer (prostate, lung, bladder) (22%), COPD (20%), or cirrhosis (6%); Mean age: 76 | Structure, Physical, Psychological, Spiritual, Legal | Palliative care physician consultation on enrollment and every weekday during hospitalization. Consultation focused on: symptom assessment, psychosocial and spiritual needs, and treatment preferences | 54 | Attention control, received brief visit from PC physician and a book on diet and exercise | 53 | <b>Symptom burden</b><br>• [NRS] Pain mean, 2.1 (95% CI, 1.1 to 3.1) vs. 2.4 (95% CI, 1.4 to 3.4) ; P=0.30<br>• [NRS] Dyspnea mean, 2.4 (95% CI, 1.5 to 3.3) vs. 1.6 (95% CI,                                                                                            | High                | N/A                |

**eTable 3. Trial Characteristics and Outcomes of 26 Palliative Care Interventions at High Risk of Bias**

| Study (Country)                                      | Design   | Patient Population                                                                                                                                   | Domains Addressed                                            | Intervention                                                                                                                                                             |    | Control     |    | Main Results                                                                                                                                                                                                                                                                | Risk of Bias        |                    |
|------------------------------------------------------|----------|------------------------------------------------------------------------------------------------------------------------------------------------------|--------------------------------------------------------------|--------------------------------------------------------------------------------------------------------------------------------------------------------------------------|----|-------------|----|-----------------------------------------------------------------------------------------------------------------------------------------------------------------------------------------------------------------------------------------------------------------------------|---------------------|--------------------|
|                                                      |          |                                                                                                                                                      |                                                              | Description                                                                                                                                                              | n  | Description | n  |                                                                                                                                                                                                                                                                             | Subjective Outcomes | Objective Outcomes |
|                                                      |          |                                                                                                                                                      |                                                              |                                                                                                                                                                          |    |             |    | 0.6 to 2.5);<br>P=0.50<br><b>Mood</b><br>• [NRS]:<br>Anxiety<br>mean, 2.5<br>(95% CI, 1.5<br>to 3.6) vs.<br>2.5 (95% CI,<br>1.3 to 3.6);<br>P=0.08<br><b>Satisfaction</b><br>• Felt heard by<br>doctors, 81%<br>vs. 77%<br>(P>0.99)                                         |                     |                    |
| Radwany et al, 2014 <sup>30</sup> (USA) <sup>b</sup> | Parallel | CHF, COPD, DM with complications, ESLD, active cancer (type not specified), renal disease, ALS, Parkinson's, or pulmonary hypertension; Mean age: 69 | Structure, Physical, Psychological, Social, Spiritual, Legal | In-home geriatric/palliative care biopsychosocial needs assessments used to develop care plan implemented by an interdisciplinary team in consultation with patient's PC | 40 | Usual care  | 40 | <b>QOL</b><br>• [QUAL-E] <sup>a</sup> :<br>6-month mean difference, -4.052 [95% CI, -11.487, 3.382]; 12-month mean difference, -3.889 [-10.722, 2.944]<br><b>Symptom burden</b><br>• [CMSAS] <sup>a</sup> :<br>6-month mean difference, -0.134 [95% CI, -0.439, 0.171]; 12- | High                | High               |

**eTable 3. Trial Characteristics and Outcomes of 26 Palliative Care Interventions at High Risk of Bias**

| Study (Country) | Design | Patient Population | Domains Addressed | Intervention |   | Control     |   | Main Results                                                                                                                                                                                                                                                                                                                                                                                                                                                                                           | Risk of Bias        |                    |
|-----------------|--------|--------------------|-------------------|--------------|---|-------------|---|--------------------------------------------------------------------------------------------------------------------------------------------------------------------------------------------------------------------------------------------------------------------------------------------------------------------------------------------------------------------------------------------------------------------------------------------------------------------------------------------------------|---------------------|--------------------|
|                 |        |                    |                   | Description  | n | Description | n |                                                                                                                                                                                                                                                                                                                                                                                                                                                                                                        | Subjective Outcomes | Objective Outcomes |
|                 |        |                    |                   |              |   |             |   | month mean difference, -0.328 [-0.716, 0.061]<br><b>Survival</b><br>• Days from enrollment to death NS, 189 vs. 150; P not reported<br><b>Mood</b><br>• [HADS] <sup>a</sup> : 6-month mean difference, -2.919 [95% CI, -6.435, 0.598]; 12-month mean difference, -4.037 [-8.584, 0.51]<br><b>Utilization:</b><br>• Hospitalization, % of patients, 25 vs. 25; P=1.0<br>• ED visits, % of patients, 50 vs. 55; P=0.65<br>• Hospice utilization, % of patients, 7.5 vs. 7.5; P=1.0<br>• Nursing facility |                     |                    |

**eTable 3. Trial Characteristics and Outcomes of 26 Palliative Care Interventions at High Risk of Bias**

| Study (Country)                            | Design   | Patient Population                          | Domains Addressed                                            | Intervention                                                                                                                                                                                                                                  |     | Control     |     | Main Results                                                                                                                                                                                                                            | Risk of Bias        |                    |
|--------------------------------------------|----------|---------------------------------------------|--------------------------------------------------------------|-----------------------------------------------------------------------------------------------------------------------------------------------------------------------------------------------------------------------------------------------|-----|-------------|-----|-----------------------------------------------------------------------------------------------------------------------------------------------------------------------------------------------------------------------------------------|---------------------|--------------------|
|                                            |          |                                             |                                                              | Description                                                                                                                                                                                                                                   | n   | Description | n   |                                                                                                                                                                                                                                         | Subjective Outcomes | Objective Outcomes |
|                                            |          |                                             |                                                              |                                                                                                                                                                                                                                               |     |             |     | admissions, % of patients, 22.5 vs. 32.5; P=0.32<br><b>ACP</b><br>• [POS] <sup>a</sup> : 6-month mean difference, -2.844 [95% CI, -5.633, -0.055]; 12-month mean difference, -4.546 [-7.853, -1.238]                                    |                     |                    |
| Sidebottom et al, 2015 <sup>31</sup> (USA) | Parallel | Adult inpatient with acute HF; Mean age: 73 | Structure, Physical, Psychological, Social, Spiritual, Legal | Inpatient specialist palliative care consultation. Content of visits included: symptom assessment; emotional, spiritual, and psychosocial aspects of care; care coordination; treatment recommendations; referral; and, advance care planning | 116 | Usual care  | 116 | <b>QOL</b><br>• [Minnesota Living with Heart Failure Questionnaire] <sup>a</sup> : Improved (mean difference, 3.06; 95% CI, 2.75-3.37; P<0.001)<br><b>Symptom burden</b><br>• [ESAS] <sup>a</sup> : Improved total symptom burden (mean | High                | High               |

**eTable 3. Trial Characteristics and Outcomes of 26 Palliative Care Interventions at High Risk of Bias**

| Study (Country) | Design | Patient Population | Domains Addressed | Intervention |   | Control     |   | Main Results                                                                                                                                                                                                                                                                                                                                                                                                                                                                                                                                                                               | Risk of Bias        |                    |
|-----------------|--------|--------------------|-------------------|--------------|---|-------------|---|--------------------------------------------------------------------------------------------------------------------------------------------------------------------------------------------------------------------------------------------------------------------------------------------------------------------------------------------------------------------------------------------------------------------------------------------------------------------------------------------------------------------------------------------------------------------------------------------|---------------------|--------------------|
|                 |        |                    |                   | Description  | n | Description | n |                                                                                                                                                                                                                                                                                                                                                                                                                                                                                                                                                                                            | Subjective Outcomes | Objective Outcomes |
|                 |        |                    |                   |              |   |             |   | difference, 4.31; 95% CI, 4.00-4.62; P<0.001); improvements in pain, fatigue, appetite, dyspnea at 3 mo.<br><b>Survival</b> <ul style="list-style-type: none"> <li>• 6-month, HR, 1.90 (95% CI, 0.88, 4.09); P=0.10</li> </ul> <b>Mood</b> <ul style="list-style-type: none"> <li>• [PHQ-9]<sup>a</sup>: Improved mean difference, 0.72 (95% CI, 0.41, 1.03); P&lt;0.001</li> </ul> <b>Utilization</b> <ul style="list-style-type: none"> <li>• 30-day readmission, HR, 1.43 (95% CI, 0.5, 4.1); P=0.50</li> <li>• Hospice use within six months, HR, 1.60 (0.58, 4.38); P=0.36</li> </ul> |                     |                    |

**eTable 3. Trial Characteristics and Outcomes of 26 Palliative Care Interventions at High Risk of Bias**

| Study (Country)                       | Design   | Patient Population                                                                     | Domains Addressed       | Intervention                                                                                                                                                                  |     | Control     |     | Main Results                                                                                                                                                                                                                                                                                                                                                                                                                                                                                                                                                                                                                                          | Risk of Bias        |                    |
|---------------------------------------|----------|----------------------------------------------------------------------------------------|-------------------------|-------------------------------------------------------------------------------------------------------------------------------------------------------------------------------|-----|-------------|-----|-------------------------------------------------------------------------------------------------------------------------------------------------------------------------------------------------------------------------------------------------------------------------------------------------------------------------------------------------------------------------------------------------------------------------------------------------------------------------------------------------------------------------------------------------------------------------------------------------------------------------------------------------------|---------------------|--------------------|
|                                       |          |                                                                                        |                         | Description                                                                                                                                                                   | n   | Description | n   |                                                                                                                                                                                                                                                                                                                                                                                                                                                                                                                                                                                                                                                       | Subjective Outcomes | Objective Outcomes |
|                                       |          |                                                                                        |                         |                                                                                                                                                                               |     |             |     | <b>ACP</b> <ul style="list-style-type: none"> <li>Improved (HR, 1.43; 95% CI, 1.09-7.59; P=0.03)</li> </ul>                                                                                                                                                                                                                                                                                                                                                                                                                                                                                                                                           |                     |                    |
| Steel et al, 2016 <sup>32</sup> (USA) | Parallel | Advanced gastrointestinal cancer, or other cancers with liver metastasis; Mean age: 61 | Physical, Psychological | Web-based collaborative care intervention that included computerized cognitive behavioral therapy, as well as a care coordinator providing symptom management recommendations | 144 | Usual care  | 117 | <b>QOL</b> <ul style="list-style-type: none"> <li>[FACT-G] QOL at 6 months, <math>d=0.99</math> (<math>P=0.05</math>)</li> </ul> <b>Symptom burden</b> <ul style="list-style-type: none"> <li>[BPI] Pain at 6 months, <math>d=0.62</math> (<math>P=0.11</math>)</li> <li>[FACT-Fatigue] Fatigue at 6 months, <math>d=0.26</math> (<math>P=0.09</math>)</li> </ul> <b>Mood</b> <ul style="list-style-type: none"> <li>[CESD] Depressive symptoms at 6 months, <math>d=0.71</math> (<math>P=0.18</math>)</li> </ul> <b>Caregiver mood</b> <ul style="list-style-type: none"> <li>[CESD] Depressive symptoms at 6 months, <math>d=0.37</math></li> </ul> | High                | High               |

**eTable 3. Trial Characteristics and Outcomes of 26 Palliative Care Interventions at High Risk of Bias**

| Study (Country)                          | Design   | Patient Population                                  | Domains Addressed                                         | Intervention                                                                                                                         |    | Control     |    | Main Results                                                                                                                                                                                                                                                                                                                                                                                                                                                                                                                                 | Risk of Bias        |                                         |
|------------------------------------------|----------|-----------------------------------------------------|-----------------------------------------------------------|--------------------------------------------------------------------------------------------------------------------------------------|----|-------------|----|----------------------------------------------------------------------------------------------------------------------------------------------------------------------------------------------------------------------------------------------------------------------------------------------------------------------------------------------------------------------------------------------------------------------------------------------------------------------------------------------------------------------------------------------|---------------------|-----------------------------------------|
|                                          |          |                                                     |                                                           | Description                                                                                                                          | n  | Description | n  |                                                                                                                                                                                                                                                                                                                                                                                                                                                                                                                                              | Subjective Outcomes | Objective Outcomes                      |
|                                          |          |                                                     |                                                           |                                                                                                                                      |    |             |    | ( <i>P</i> =0.10)<br><b>Caregiver QOL</b><br><ul style="list-style-type: none"> <li>[Caregiver QOL Index-Cancer] Caregiver stress at 6 months, <i>d</i>=0.75 (<i>P</i>=0.05)</li> </ul>                                                                                                                                                                                                                                                                                                                                                      |                     |                                         |
| Temel et al, 2010 <sup>33-35</sup> (USA) | Parallel | Metastatic non-small cell lung cancer; Mean age: 65 | Structure, Physical, Psychological, Spiritual, EOL, Legal | Specialist palliative care provided by physician/advance practice provider within 11 weeks of diagnosis and then monthly until death | 77 | Usual care  | 74 | <b>QOL</b><br><ul style="list-style-type: none"> <li>[TOI]<sup>a</sup> 12 weeks (ES, 0.52; <i>P</i>=0.009)</li> <li>[FACT-L] 12 weeks (ES, 0.42; <i>P</i>=0.03)</li> </ul> <b>Symptom burden</b><br><ul style="list-style-type: none"> <li>[LCS]12 weeks (ES, 0.41; <i>P</i>=0.04)</li> </ul> <b>Survival</b><br><ul style="list-style-type: none"> <li>Median, 11.6 vs. 8.9 months (<i>P</i>=0.02)</li> </ul> <b>Mood</b><br><ul style="list-style-type: none"> <li>[HADS] Patients meeting criteria for depression, 16% vs. 38%</li> </ul> | Low                 | High for survival only; all others, Low |



**eTable 3. Trial Characteristics and Outcomes of 26 Palliative Care Interventions at High Risk of Bias**

| Study (Country)                        | Design   | Patient Population                                                                 | Domains Addressed                                     | Intervention                                                                                                                                              |    | Control     |    | Main Results                                                                                                                                                                                                                                                                  | Risk of Bias        |                    |
|----------------------------------------|----------|------------------------------------------------------------------------------------|-------------------------------------------------------|-----------------------------------------------------------------------------------------------------------------------------------------------------------|----|-------------|----|-------------------------------------------------------------------------------------------------------------------------------------------------------------------------------------------------------------------------------------------------------------------------------|---------------------|--------------------|
|                                        |          |                                                                                    |                                                       | Description                                                                                                                                               | n  | Description | n  |                                                                                                                                                                                                                                                                               | Subjective Outcomes | Objective Outcomes |
|                                        |          |                                                                                    |                                                       |                                                                                                                                                           |    |             |    | (P=0.01)<br>• [PHQ-9] Patients meeting criteria for depression, 4% vs. 17% (P=0.05)<br><b>Utilization</b><br>• Use of aggressive end-of-life care, 33% vs. 54% (P=0.05)<br><b>Advance care planning</b><br>• Documentation of resuscitation preferences, 53% vs. 28% (P=0.05) |                     |                    |
| Wallen et al, 2012 <sup>36</sup> (USA) | Parallel | Advanced cancer (types not specified) undergoing surgical procedures; Mean age: 53 | Structure, Physical, Psychological, Social, Spiritual | Inpatient/outpatient palliative care consult service. Consults include comprehensive pain/symptom assessment, as well as emotional and spiritual distress | 76 | Usual care  | 76 | <b>Symptom burden</b><br>• [Gracely Pain Scale] <sup>a</sup> Pain unpleasantness at 9 months NS (mean difference, -2.31; P=0.23)<br>• [Symptom Distress Scale] <sup>a</sup>                                                                                                   | High                | High               |

**eTable 3. Trial Characteristics and Outcomes of 26 Palliative Care Interventions at High Risk of Bias**

| Study (Country)                            | Design   | Patient Population                                     | Domains Addressed                                 | Intervention                                                                                       |    | Control                                           |    | Main Results                                                                                                                                                                                                                                                                                                                                                                                                                                                                                                                                                   | Risk of Bias        |                    |
|--------------------------------------------|----------|--------------------------------------------------------|---------------------------------------------------|----------------------------------------------------------------------------------------------------|----|---------------------------------------------------|----|----------------------------------------------------------------------------------------------------------------------------------------------------------------------------------------------------------------------------------------------------------------------------------------------------------------------------------------------------------------------------------------------------------------------------------------------------------------------------------------------------------------------------------------------------------------|---------------------|--------------------|
|                                            |          |                                                        |                                                   | Description                                                                                        | n  | Description                                       | n  |                                                                                                                                                                                                                                                                                                                                                                                                                                                                                                                                                                | Subjective Outcomes | Objective Outcomes |
|                                            |          |                                                        |                                                   |                                                                                                    |    |                                                   |    | Symptom distress at 9 months NS (mean difference, -1.89; $P=0.50$ )                                                                                                                                                                                                                                                                                                                                                                                                                                                                                            |                     |                    |
| Wong et al, 2016 <sup>37</sup> (Hong Kong) | Parallel | Advanced HF (e.g., NYHA stage III or IV); Mean age: 78 | Structure, Physical, Psychological, Social, Legal | Transitional palliative care provided by palliative care home nurses via home visits and telephone | 43 | Usual care plus two attention control phone calls | 41 | <b>Symptom burden</b> <ul style="list-style-type: none"> <li>• [ESAS] Clinically important improvement in total score, 73% vs. 41.4; <math>P&lt;0.05</math></li> </ul> <b>QOL</b> <ul style="list-style-type: none"> <li>• [McGill] Better QOL at 4 weeks, 7.57 points vs. 6.46 points; <math>P&lt;0.001</math></li> <li>• [Chronic HF Questionnaire] Better QOL at 4 weeks, 5.26 points vs. 4.47 points; <math>P&lt;0.001</math></li> </ul> <b>Satisfaction with care</b> <ul style="list-style-type: none"> <li>• Higher satisfaction at 4 weeks,</li> </ul> | High                | High               |

**eTable 3. Trial Characteristics and Outcomes of 26 Palliative Care Interventions at High Risk of Bias**

| Study (Country)                           | Design   | Patient Population                                                                               | Domains Addressed                               | Intervention                                                                                                                                                                                                                         |    | Control     |    | Main Results                                                                                                                                                                                                                                                                                                                                                                                        | Risk of Bias        |                    |
|-------------------------------------------|----------|--------------------------------------------------------------------------------------------------|-------------------------------------------------|--------------------------------------------------------------------------------------------------------------------------------------------------------------------------------------------------------------------------------------|----|-------------|----|-----------------------------------------------------------------------------------------------------------------------------------------------------------------------------------------------------------------------------------------------------------------------------------------------------------------------------------------------------------------------------------------------------|---------------------|--------------------|
|                                           |          |                                                                                                  |                                                 | Description                                                                                                                                                                                                                          | n  | Description | n  |                                                                                                                                                                                                                                                                                                                                                                                                     | Subjective Outcomes | Objective Outcomes |
|                                           |          |                                                                                                  |                                                 |                                                                                                                                                                                                                                      |    |             |    | 48.84 points vs. 3.55 points, P<0.001<br><b>Utilization</b><br><ul style="list-style-type: none"> <li>• Readmission at 4 weeks, 20.9% vs. 29.3%, P=0.38</li> <li>• Readmission at 12 weeks, 33.6% vs. 61%, P=0.009</li> </ul>                                                                                                                                                                       |                     |                    |
| Zimmer et al, 1984 <sup>38,39</sup> (USA) | Parallel | Seriously ill homebound patients: cancer (type not specified) (19%), stroke (15%); Median age 77 | Structure, Physical, Psychological, Social, EOL | Home health care team, plus 24-hour phone line. Initial consultation by physician, with additional home visits by nurse practitioner and social worker. Medical, nursing, social, emotional, and financial support services provided | 85 | Usual care  | 82 | <b>Survival</b><br><ul style="list-style-type: none"> <li>• Six-month mortality, 36% vs. 29%; P&gt;0.10</li> </ul> <b>Utilization</b><br><ul style="list-style-type: none"> <li>• Decreased per capita hospital admissions (mean, 0.35 vs. 0.41; P not reported)</li> <li>• Decreased nursing home admissions (mean, 0.06 vs. 0.11; P not reported)</li> <li>• Increased ED visits (mean</li> </ul> | High                | High               |

**eTable 3. Trial Characteristics and Outcomes of 26 Palliative Care Interventions at High Risk of Bias**

| Study (Country) | Design | Patient Population | Domains Addressed | Intervention |   | Control     |   | Main Results                                                                                                                                                                                                                                                                                                                                                                                                                                                                                    | Risk of Bias        |                    |
|-----------------|--------|--------------------|-------------------|--------------|---|-------------|---|-------------------------------------------------------------------------------------------------------------------------------------------------------------------------------------------------------------------------------------------------------------------------------------------------------------------------------------------------------------------------------------------------------------------------------------------------------------------------------------------------|---------------------|--------------------|
|                 |        |                    |                   | Description  | n | Description | n |                                                                                                                                                                                                                                                                                                                                                                                                                                                                                                 | Subjective Outcomes | Objective Outcomes |
|                 |        |                    |                   |              |   |             |   | utilization rate per month, 0.26 vs. 0.05; P not reported)<br><b>Site of death</b><br>• Increased at-home death (71% vs. 47%; P not reported)<br><b>Satisfaction</b><br>• [McCusker scale]: NS at all time points; P not reported<br><b>Expenditures</b><br>• Lower mean total costs among decedents (\$1,577 vs. \$2,293, P not reported) <sup>39</sup><br><b>Caregiver satisfaction</b><br>• [McCusker scale]: Improved at 3 months (96.9 vs. 82.1; P<0.0001) and at 6 months (99.8 vs. 88.8; |                     |                    |

**eTable 3. Trial Characteristics and Outcomes of 26 Palliative Care Interventions at High Risk of Bias**

| Study (Country)                          | Design            | Patient Population                                                                                                             | Domains Addressed                                            | Intervention                                                                                                                                                                        |    | Control                                                                 |    | Main Results                                                                                                                                                                                                                                                                                                                                                                                                          | Risk of Bias        |                    |
|------------------------------------------|-------------------|--------------------------------------------------------------------------------------------------------------------------------|--------------------------------------------------------------|-------------------------------------------------------------------------------------------------------------------------------------------------------------------------------------|----|-------------------------------------------------------------------------|----|-----------------------------------------------------------------------------------------------------------------------------------------------------------------------------------------------------------------------------------------------------------------------------------------------------------------------------------------------------------------------------------------------------------------------|---------------------|--------------------|
|                                          |                   |                                                                                                                                |                                                              | Description                                                                                                                                                                         | n  | Description                                                             | n  |                                                                                                                                                                                                                                                                                                                                                                                                                       | Subjective Outcomes | Objective Outcomes |
| P<0.002)                                 |                   |                                                                                                                                |                                                              |                                                                                                                                                                                     |    |                                                                         |    |                                                                                                                                                                                                                                                                                                                                                                                                                       |                     |                    |
| <b>Trials with cluster randomization</b> |                   |                                                                                                                                |                                                              |                                                                                                                                                                                     |    |                                                                         |    |                                                                                                                                                                                                                                                                                                                                                                                                                       |                     |                    |
| McCorkle et al, 2015 <sup>40</sup> (USA) | Cluster, parallel | Late-stage cancer (lung, head or neck, gastrointestinal, gynecological) diagnosis plus $\geq 1$ chronic condition; Mean age:60 | Structure, Physical, Psychological, Social, Legal            | Multidisciplinary palliative collaborative care intervention led by advanced practice nurse, focusing on topics including symptom management, care coordination, and goals of care. | 66 | Enhanced usual care (usual care plus symptom management resource guide) | 80 | <b>Symptom burden</b> <ul style="list-style-type: none"> <li>• [Symptom Distress Scale] NS at 1 month, (P=0.61)</li> </ul> <b>QOL</b> <ul style="list-style-type: none"> <li>• [FACT-G] NS at 1 month, (P=0.11); NS at 3 months, (P=0.37)</li> </ul> <b>Mood</b> <ul style="list-style-type: none"> <li>• [PHQ-9] Depression at 3 months, (P=0.93)</li> <li>• [HADS-Anxiety] Anxiety at 3 months, (P=0.12)</li> </ul> | High                | N/A                |
| Rabow et al, 2004 <sup>41</sup> (USA)    | Cluster, parallel | Advanced CHF (34%), cancer (type not specified) (33%), or advanced COPD (32%); Prognosis: 1-5 years; Mean age: 69              | Structure, Physical, Psychological, Social, Spiritual, Legal | Interdisciplinary PC team providing outpatient PC consultation, case management, psychological support, chaplaincy, caregiver training, medication review, and support groups       | 50 | Usual care                                                              | 40 | <b>QOL</b> <ul style="list-style-type: none"> <li>• [Multidimensional Quality of Life Scale-Cancer]: (F=1.02; P=0.32)</li> </ul> <b>Symptom burden</b> <ul style="list-style-type: none"> <li>• [UCSD Shortness of Breath</li> </ul>                                                                                                                                                                                  | High                | High               |

**eTable 3. Trial Characteristics and Outcomes of 26 Palliative Care Interventions at High Risk of Bias**

| Study (Country) | Design | Patient Population | Domains Addressed | Intervention |   | Control     |   | Main Results                                                                                                                                                                                                                                                                                                                                                                                                                    | Risk of Bias        |                    |
|-----------------|--------|--------------------|-------------------|--------------|---|-------------|---|---------------------------------------------------------------------------------------------------------------------------------------------------------------------------------------------------------------------------------------------------------------------------------------------------------------------------------------------------------------------------------------------------------------------------------|---------------------|--------------------|
|                 |        |                    |                   | Description  | n | Description | n |                                                                                                                                                                                                                                                                                                                                                                                                                                 | Subjective Outcomes | Objective Outcomes |
|                 |        |                    |                   |              |   |             |   | Questionnaire] Dyspnea, OR, 6.07 (95% CI, 1.04 to 35.56)<br>• [Brief Pain Inventory] Mean pain, F=1.03 (P=0.32)<br>• [Medical Outcomes Study Survey] Sleep quality, F=0.14 (P=0.71)<br><b>Mood</b><br>• [POMS] Anxiety (F=4.09; P=0.05)<br>• [CES-D] Depression (F=0.71; P=0.40)<br><b>Utilization</b><br>• Primary care visits, mean, 7.5 vs. 10.6 (P=0.03)<br>• Urgent care visits, mean, 0.3 vs. 0.6 (P=0.04)<br>• Specialty |                     |                    |

**eTable 3. Trial Characteristics and Outcomes of 26 Palliative Care Interventions at High Risk of Bias**

| Study (Country) | Design | Patient Population | Domains Addressed | Intervention |   | Control     |   | Main Results                                                                                                                                                                                                                                                                                                                                                                                                                                                                      | Risk of Bias        |                    |
|-----------------|--------|--------------------|-------------------|--------------|---|-------------|---|-----------------------------------------------------------------------------------------------------------------------------------------------------------------------------------------------------------------------------------------------------------------------------------------------------------------------------------------------------------------------------------------------------------------------------------------------------------------------------------|---------------------|--------------------|
|                 |        |                    |                   | Description  | n | Description | n |                                                                                                                                                                                                                                                                                                                                                                                                                                                                                   | Subjective Outcomes | Objective Outcomes |
|                 |        |                    |                   |              |   |             |   | clinic visits, mean, 7.0 vs. 4.9 (P=0.25)<br>• ED visits, mean, 1.7 vs. 1.6 (P=0.81)<br>• Hospitalizations, mean, 0.8 vs. 1.2 (P=0.21)<br><b>Expenditures</b><br>• Total charges, mean [SD], \$47,211USD [\$73,009USD] vs. \$43,338USD [\$69,647USD] (P=0.80)<br><b>Advance care planning</b><br>• Completion of healthcare power of attorney, 55% vs. 28% (P=0.12)<br><b>Site of death</b><br>• Data not reported (P=0.40)<br><b>Satisfaction</b><br>• [Group Health Association |                     |                    |

**eTable 3. Trial Characteristics and Outcomes of 26 Palliative Care Interventions at High Risk of Bias**

| Study (Country) | Design | Patient Population | Domains Addressed | Intervention |   | Control     |   | Main Results                                              | Risk of Bias        |                    |
|-----------------|--------|--------------------|-------------------|--------------|---|-------------|---|-----------------------------------------------------------|---------------------|--------------------|
|                 |        |                    |                   | Description  | n | Description | n |                                                           | Subjective Outcomes | Objective Outcomes |
|                 |        |                    |                   |              |   |             |   | of America Consumer Satisfaction Survey]: F=0.61 (P=0.44) |                     |                    |

Legend:

- <sup>a</sup> Primary outcome measure; otherwise, not defined in article.
- <sup>b</sup> Explicitly labeled as a pilot (or hypothesis generating, not hypothesis testing) study.
- <sup>c</sup> Data analyzed and presented at dyad level
- <sup>d</sup> Study closed early due to releasing of results of a different study.
- <sup>e</sup> Assessed with an unvalidated instrument.
- <sup>f</sup> Study does not provide number of patients in each experimental condition.

ES, effect size. NS, not significant. d, Hedges' d. g, Hedges' g. h, Hedges' h. OR, odds ratio. CI, confidence interval. HF, heart failure. COPD, chronic obstructive pulmonary disease. MSAS, Memorial Symptom Assessment Scale. CHF, congestive heart failure. ED, emergency department. GI, gastrointestinal. QOL, quality of life. FACIT-Pal, Functional Assessment of Chronic Illness Therapy – Palliative care. TOI, Trial Outcome Index. QUAL-E, Quality of Life at the End of Life. CESD, Center for Epidemiologic Studies Depression Scale. RR, risk ratio. CQOL-C, Caregiver Quality of Life Index – Cancer. MBCB, Montgomery Borgatta Caregiver Burden scale. PG13, Prolonged Grief – short form. NYHA, New York Heart Association. EQ-5D, EuroQOL Five Dimensions Scale. KCCQ, Kansas City Cardiomyopathy Questionnaire. SD, standard deviation. ICU, intensive care unit. EOL, end of life. IQR, interquartile range. LOS, length of stay. FACT-G, Functional Assessment of Cancer Therapy – General. POMS, Profile of Mood States. LASA, Linear Analog Scale Assessment. NRS, Numerical Rating Scale. HADS, Hospital Anxiety and Depression Scale. SF-36, 36-Item Short Form Survey. AIDS, Acquired immunodeficiency syndrome. GP, general practitioner. DNR, do not resuscitate. VA, Veterans Administration. FACT-B, Functional Assessment of Cancer Therapy-Breast. PC, palliative care. DM, diabetes mellitus. ESLD, End-stage liver disease. ALS, Amyotrophic lateral sclerosis. CMSAS, Condensed Memorial Symptom Assessment Scale. ACP, advance care planning. POS, Palliative Care Outcome Scale. ESAS, Edmonton Symptom Assessment Scale. HR, hazard ratio. PHQ-9, Patient Health Questionnaire 9. BPI, Brief Pain Inventory. FACT-L, Functional Assessment of Cancer Therapy-Lung. LCS, Lung Cancer Subscale.

Structure, Structure and processes of care. Psychological, Psychological and psychiatric aspects of care. Social, Social aspects of care. Cultural, Cultural aspects of care. Spiritual, Spiritual, religious, and existential aspects of care. EOL, Care of the imminently dying patient. Legal, Ethical and legal aspects of care.

Note: Primary outcome reported, regardless of whether it is one of our pre-specified outcomes of interest. If no primary outcome specified in paper, and the outcome is not one of our outcomes of interest, it is not reported here. All comparisons are intervention versus control, if not otherwise specified. Ambulatory interventions refer to those interventions where patients were required to travel to either an outpatient clinic or an intervention delivery site. Subjective outcomes include all patient-reported outcomes (e.g., QOL, symptoms, mood), whereas objective outcomes include those outcomes which are not subject to detection bias (e.g., survival, healthcare utilization and expenditures abstracted from clinical or administrative records).



**eTable 4. Trial Characteristics and Outcomes of 11 Palliative Care Interventions at Unclear Risk of Bias**

| Study (Country)                                | Design   | Patient Population                              | Domains Addressed          | Intervention                                                                                  |    | Control     |    | Main Results                                                                                                                                                                                                                                                                                                                                                                                                                                       | Risk of Bias        |                    |
|------------------------------------------------|----------|-------------------------------------------------|----------------------------|-----------------------------------------------------------------------------------------------|----|-------------|----|----------------------------------------------------------------------------------------------------------------------------------------------------------------------------------------------------------------------------------------------------------------------------------------------------------------------------------------------------------------------------------------------------------------------------------------------------|---------------------|--------------------|
|                                                |          |                                                 |                            | Description                                                                                   | n  | Description | n  |                                                                                                                                                                                                                                                                                                                                                                                                                                                    | Subjective Outcomes | Objective Outcomes |
| <b>Trials with patient-level randomization</b> |          |                                                 |                            |                                                                                               |    |             |    |                                                                                                                                                                                                                                                                                                                                                                                                                                                    |                     |                    |
| Ahronheim et al, 2000 <sup>42</sup> (USA)      | Parallel | Inpatients with advanced dementia; Mean age: 85 | Structure, Physical, Legal | Daily PC consultations (from MD and RN) to provide recommendations to enhance patient comfort | 48 | Usual care  | 51 | <p><b>Utilization</b></p> <ul style="list-style-type: none"> <li>• LOS, 8.8 vs. 9.7 days (P=0.46)</li> <li>• Receipt of IV therapy during hospitalization, 66% vs. 81% (P=0.03)</li> </ul> <p><b>ACP</b></p> <ul style="list-style-type: none"> <li>• Discharged with a palliative care plan, 23% vs. 4% (P=0.008)</li> </ul> <p><b>Survival</b></p> <ul style="list-style-type: none"> <li>• In-hospital mortality, 12 vs. 12 (P=0.96)</li> </ul> | Unclear             | Unclear            |

**eTable 4. Trial Characteristics and Outcomes of 11 Palliative Care Interventions at Unclear Risk of Bias**

| Study (Country)                          | Design   | Patient Population                                                                                    | Domains Addressed                                            | Intervention                                                                                               |     | Control     |     | Main Results                                                                                                                                                                                                                                                                                                                                                                                                                                                                                                                                                                         | Risk of Bias        |                    |
|------------------------------------------|----------|-------------------------------------------------------------------------------------------------------|--------------------------------------------------------------|------------------------------------------------------------------------------------------------------------|-----|-------------|-----|--------------------------------------------------------------------------------------------------------------------------------------------------------------------------------------------------------------------------------------------------------------------------------------------------------------------------------------------------------------------------------------------------------------------------------------------------------------------------------------------------------------------------------------------------------------------------------------|---------------------|--------------------|
|                                          |          |                                                                                                       |                                                              | Description                                                                                                | n   | Description | n   |                                                                                                                                                                                                                                                                                                                                                                                                                                                                                                                                                                                      | Subjective Outcomes | Objective Outcomes |
| Bekelman et al, 2015 <sup>43</sup> (USA) | Parallel | CHF with poor QOL, limited functional status, and significant symptoms (KCCQ score <60); Mean age: 68 | Structure, Physical, Psychological                           | Multidisciplinary collaborative CHF disease management, and tele-monitoring with patient self-care support | 193 | Usual care  | 199 | <b>QOL</b> <ul style="list-style-type: none"> <li>[KCCQ]<sup>a</sup> one year, overall KCCQ score, 54.2 (95% CI, 51.7 to 56.6) vs. 53.6 (95% CI, 51.1 to 56.0)</li> </ul> <b>Survival</b> <ul style="list-style-type: none"> <li>One-year mortality (4.3% vs. 9.67%; P=0.04)</li> </ul> <b>Mood</b> <ul style="list-style-type: none"> <li>[PHQ-9]: among patients with positive depression screen, 2.1 points lower (95% CI, 0.43 to 3.78); P=0.01</li> </ul> <b>Utilization</b> <ul style="list-style-type: none"> <li>One-year hospitalization 29.4% vs. 29.9%; P=0.87</li> </ul> | Unclear             | Unclear            |
| Brumley et al, 2007 <sup>44</sup> (USA)  | Parallel | Cancer (type not specified) (47%), CHF (33%), or COPD (21%); Prognosis: ≤ 1 year; Mean age: 74        | Structure, Physical, Psychological, Social, Spiritual, Legal | Multidisciplinary home-based palliative care                                                               | 155 | Usual care  | 155 | <b>Utilization</b> <ul style="list-style-type: none"> <li>ED utilization, 20% vs. 33%; P=0.01</li> <li>Hospitalization, 36% vs. 59%; P&lt;0.001</li> <li>Hospice enrollment, 25% vs. 36%; P=0.15</li> </ul>                                                                                                                                                                                                                                                                                                                                                                          | Unclear             | Unclear            |

**eTable 4. Trial Characteristics and Outcomes of 11 Palliative Care Interventions at Unclear Risk of Bias**

| Study (Country)                                        | Design             | Patient Population                                                          | Domains Addressed                                 | Intervention                                                                                                                                                                                                                                                                   |                            | Control                         |                            | Main Results                                                                                                                                                                                                                                                                                                                                                                                                                                                                         | Risk of Bias        |                    |
|--------------------------------------------------------|--------------------|-----------------------------------------------------------------------------|---------------------------------------------------|--------------------------------------------------------------------------------------------------------------------------------------------------------------------------------------------------------------------------------------------------------------------------------|----------------------------|---------------------------------|----------------------------|--------------------------------------------------------------------------------------------------------------------------------------------------------------------------------------------------------------------------------------------------------------------------------------------------------------------------------------------------------------------------------------------------------------------------------------------------------------------------------------|---------------------|--------------------|
|                                                        |                    |                                                                             |                                                   | Description                                                                                                                                                                                                                                                                    | n                          | Description                     | n                          |                                                                                                                                                                                                                                                                                                                                                                                                                                                                                      | Subjective Outcomes | Objective Outcomes |
|                                                        |                    |                                                                             |                                                   |                                                                                                                                                                                                                                                                                |                            |                                 |                            | <p><b>Site of death</b></p> <ul style="list-style-type: none"> <li>In-home death OR=2.20; 95% CI=1.3 to 3.7; P&lt;0.001</li> </ul> <p><b>Satisfaction</b></p> <ul style="list-style-type: none"> <li>[Reid-Gundlach]: OR=3.37, 95% CI=0.65-4.96; P=0.03</li> </ul> <p><b>Expenditures</b></p> <ul style="list-style-type: none"> <li>Decreased healthcare costs, 33% reduction; 95% CI= - \$12,411USD to - \$780USD; P=0.03</li> </ul>                                               |                     |                    |
| Edmonds et al, 2010 <sup>45-47</sup> (UK) <sup>b</sup> | Waitlist, parallel | Multiple sclerosis with clinician-identified palliative needs; Mean age: 53 | Structure, Physical, Psychological, Social, Legal | Assessment and follow-up from multidisciplinary palliative care consultative service, focusing on symptom management, psychological concerns, social issues, caregiver concerns, and advance care planning (n=26 patients, 26 caregivers) <sup>c</sup> ; C: (n=26 patients, 24 | 26 patients, 21 caregivers | Delayed intervention (12 weeks) | 26 patients, 22 caregivers | <p><b>Symptom burden</b></p> <ul style="list-style-type: none"> <li>[MS Palliative Outcome Scale-S5]<sup>a</sup>: ES, -0.8 (P=0.035)</li> </ul> <p><b>Expenditures</b></p> <ul style="list-style-type: none"> <li>Total costs, difference, - £1,789 (95% CI, -£5,224 to £1,902).</li> </ul> <p><b>Other</b></p> <ul style="list-style-type: none"> <li>[Palliative Outcomes Scale]<sup>a</sup> Palliative care needs subscale, ES, 0.2 (P=0.30)</li> <li>[Modified Lawton</li> </ul> | Unclear             | Unclear            |

**eTable 4. Trial Characteristics and Outcomes of 11 Palliative Care Interventions at Unclear Risk of Bias**

| Study (Country)                      | Design   | Patient Population                                                                                | Domains Addressed                                          | Intervention                                   |     | Control     |     | Main Results                                                                                                                                                                                                                                                                                                                                                                                                                                                                           | Risk of Bias        |                    |
|--------------------------------------|----------|---------------------------------------------------------------------------------------------------|------------------------------------------------------------|------------------------------------------------|-----|-------------|-----|----------------------------------------------------------------------------------------------------------------------------------------------------------------------------------------------------------------------------------------------------------------------------------------------------------------------------------------------------------------------------------------------------------------------------------------------------------------------------------------|---------------------|--------------------|
|                                      |          |                                                                                                   |                                                            | Description                                    | n   | Description | n   |                                                                                                                                                                                                                                                                                                                                                                                                                                                                                        | Subjective Outcomes | Objective Outcomes |
|                                      |          |                                                                                                   |                                                            | caregivers) <sup>d</sup>                       |     |             |     | scale] <sup>a</sup> :<br>Caregiver positivity ES, -0.3 (P=0.75)<br><b>Caregiver burden</b><br>• [Zarit] <sup>a</sup> : ES, -1.3 (P=0.013)                                                                                                                                                                                                                                                                                                                                              |                     |                    |
| Gade et al, 2008 <sup>48</sup> (USA) | Parallel | Life limiting illness (31% cancer (type not specified), 7% CHF); Prognosis: < 1 year; Mean age:73 | Structure, Physical, Psychological, Social, Spiritual, EOL | Inpatient consultative palliative care service | 280 | Usual care  | 237 | <b>Symptom burden</b><br>• [Modified City of Hope Patient Questionnaire] <sup>a</sup> NS at hospital discharge (4.0 vs. 4.11 P=0.91)<br><b>Survival</b><br>• Median survival NS, 30 vs. 36 days; P=0.08<br><b>Utilization</b><br>• Fewer ICU admissions (12 vs. 21; P=0.04)<br>• Longer median hospice stays (24 vs. 12 days; P=0.04)<br>• Admission to hospice NS (P=0.50)<br><b>ACP</b><br>• Increased proportion of patients with advance directives at discharge (91.1% vs. 77.8%; | Unclear             | Unclear            |

**eTable 4. Trial Characteristics and Outcomes of 11 Palliative Care Interventions at Unclear Risk of Bias**

| Study (Country)                         | Design   | Patient Population                                                                                                                         | Domains Addressed                                                 | Intervention                                                                                                                                                                                                |    | Control     |    | Main Results                                                                                                                                                                                                                                                                                                                                                                                                                                                                                                | Risk of Bias        |                    |
|-----------------------------------------|----------|--------------------------------------------------------------------------------------------------------------------------------------------|-------------------------------------------------------------------|-------------------------------------------------------------------------------------------------------------------------------------------------------------------------------------------------------------|----|-------------|----|-------------------------------------------------------------------------------------------------------------------------------------------------------------------------------------------------------------------------------------------------------------------------------------------------------------------------------------------------------------------------------------------------------------------------------------------------------------------------------------------------------------|---------------------|--------------------|
|                                         |          |                                                                                                                                            |                                                                   | Description                                                                                                                                                                                                 | n  | Description | n  |                                                                                                                                                                                                                                                                                                                                                                                                                                                                                                             | Subjective Outcomes | Objective Outcomes |
|                                         |          |                                                                                                                                            |                                                                   |                                                                                                                                                                                                             |    |             |    | <p><i>P</i>&lt;0.001)</p> <p><b>Satisfaction</b></p> <ul style="list-style-type: none"> <li>[Modified City of Hope Patient Questionnaire]<sup>a</sup>: Improved satisfaction regarding place of care (6.8 vs. 6.4; <i>P</i>&lt;0.001) and improved satisfaction with provider communication (8.3 vs. 7.2; <i>P</i>&lt;0.001)</li> </ul> <p><b>Expenditures</b><sup>a</sup></p> <ul style="list-style-type: none"> <li>Decreased mean 6-month total costs per patient by \$6,766 (<i>P</i>=0.001)</li> </ul> |                     |                    |
| Grudzen et al, 2016 <sup>49</sup> (USA) | Parallel | Stage III-IV cancer (solid or hematological (breast, colorectal, lung, other)) presenting to quaternary emergency department; Mean age: 57 | Structure, Physical, Psychological, Social, Spiritual, EOL, Legal | Comprehensive, multidisciplinary palliative care consultation initiated while in the emergency department. Consultation comprised: symptom assessment and treatment; goals of care and ACP; and, transition | 69 | Usual care  | 67 | <p><b>QOL</b></p> <ul style="list-style-type: none"> <li>[FACT-G]<sup>a</sup>: NS at six weeks, increase from baseline 4.78 points vs. 1.52 points (<i>P</i>=0.05); Improved at 12 weeks greater in intervention vs. control (5.91 points vs. 1.08 points; <i>P</i>=0.03)</li> </ul> <p><b>Survival</b></p> <ul style="list-style-type: none"> <li>289 days (95%</li> </ul>                                                                                                                                 | Unclear             | Unclear            |

**eTable 4. Trial Characteristics and Outcomes of 11 Palliative Care Interventions at Unclear Risk of Bias**

| Study (Country)                      | Design   | Patient Population                                                                                       | Domains Addressed                                     | Intervention                                                             |                             | Control                                                                              |                            | Main Results                                                                                                                                                                                                                                                                                                                                             | Risk of Bias        |                    |
|--------------------------------------|----------|----------------------------------------------------------------------------------------------------------|-------------------------------------------------------|--------------------------------------------------------------------------|-----------------------------|--------------------------------------------------------------------------------------|----------------------------|----------------------------------------------------------------------------------------------------------------------------------------------------------------------------------------------------------------------------------------------------------------------------------------------------------------------------------------------------------|---------------------|--------------------|
|                                      |          |                                                                                                          |                                                       | Description                                                              | n                           | Description                                                                          | n                          |                                                                                                                                                                                                                                                                                                                                                          | Subjective Outcomes | Objective Outcomes |
|                                      |          |                                                                                                          |                                                       | planning                                                                 |                             |                                                                                      |                            | CI, 128-453) vs 132 days (95% CI, 80-302); P=0.20<br><br><b>Mood</b><br>• [PHQ-9]: NS at 6 weeks (P=0.97); NS at 12 weeks (P=0.46).<br><br><b>Utilization</b><br>• Hospice use, 28% vs. 25%; P=0.85<br>• Hospital days at 180 days post-enrollment, 17.45±20.18 vs. 10.93±9.33; P=0.14<br>• ICU admission at 180 days post-enrollment, 9% vs. 7%; P>0.99 |                     |                    |
| Hanks et al, 2002 <sup>50</sup> (UK) | Parallel | Inpatients referred to PC service (93% cancer (type not specified)); Prognosis: > 24 hours; Mean age: 68 | Structure, Physical, Psychological, Social, Spiritual | Multidisciplinary hospital-based specialist palliative care consultation | 175 patients, 85 caregivers | Limited telephone-based palliative care consultation provided to referring clinician | 86 patients, 42 caregivers | <b>QOL</b><br>• [EORTC QLQ-C30] <sup>a</sup> Mean difference at 1 week, 2.35 (95% CI, -3.7, 8.4); P=0.45<br><br><b>Symptom burden</b><br>• [VAS] <sup>a</sup> Severity of most bothersome symptom, mean difference at 1 week, 2.94 (95%                                                                                                                  | Unclear             | Unclear            |

**eTable 4. Trial Characteristics and Outcomes of 11 Palliative Care Interventions at Unclear Risk of Bias**

| Study (Country)                         | Design   | Patient Population                                                                                             | Domains Addressed                                          | Intervention                           |                  | Control     |                  | Main Results                                                                                                                                                                                                                                                                                                                                                                                                                                                                                                                                                                                                                                                  | Risk of Bias        |                    |
|-----------------------------------------|----------|----------------------------------------------------------------------------------------------------------------|------------------------------------------------------------|----------------------------------------|------------------|-------------|------------------|---------------------------------------------------------------------------------------------------------------------------------------------------------------------------------------------------------------------------------------------------------------------------------------------------------------------------------------------------------------------------------------------------------------------------------------------------------------------------------------------------------------------------------------------------------------------------------------------------------------------------------------------------------------|---------------------|--------------------|
|                                         |          |                                                                                                                |                                                            | Description                            | n                | Description | n                |                                                                                                                                                                                                                                                                                                                                                                                                                                                                                                                                                                                                                                                               | Subjective Outcomes | Objective Outcomes |
|                                         |          |                                                                                                                |                                                            |                                        |                  |             |                  | CI, -5.3, 11.1);<br><i>P</i> =0.48<br><b>Mood</b> <ul style="list-style-type: none"> <li>• [Memorial Pain Assessment Card]<sup>a</sup> Mean difference at 1 week, 3.97 (95% CI, -2.5, 10.4); <i>P</i>=0.23</li> <li>Utilization</li> <li>• Hospital LOS<sup>a</sup> NS, 14.7 vs. 13.2 days; <i>P</i> not reported</li> <li>• Readmissions<sup>a</sup> NS, 0.18 vs. 0.18; <i>P</i> not reported</li> </ul> <b>Satisfaction</b> <ul style="list-style-type: none"> <li>• [MacAdam's Assessment of Suffering] NS, data not reported</li> </ul> <b>Caregiver satisfaction</b> <ul style="list-style-type: none"> <li>• [FAMCARE] NS, data not reported</li> </ul> |                     |                    |
| Kane et al, 1984 <sup>51,52</sup> (USA) | Parallel | Terminal cancer (lung, prostate, ear, nose, throat, brain, other); Prognosis: 2 weeks - 6 months; Mean age: 64 | Structure, Physical, Psychological, Social, Spiritual, EOL | Inpatient and/or home hospice services | 137 <sup>c</sup> | Usual care  | 110 <sup>c</sup> | <b>Symptom burden</b> <ul style="list-style-type: none"> <li>• [California Pain Assessment Profile]: Pain NS, data not reported</li> </ul> <b>Mood</b> <ul style="list-style-type: none"> <li>• [CES-D] Depression NS, data not reported</li> </ul>                                                                                                                                                                                                                                                                                                                                                                                                           | Unclear             | Unclear            |

**eTable 4. Trial Characteristics and Outcomes of 11 Palliative Care Interventions at Unclear Risk of Bias**

| Study (Country) | Design | Patient Population | Domains Addressed | Intervention |   | Control     |   | Main Results                                                                                                                                                                                                                                                                                                                                                                                                                                                                                                                                                                                                                                                                                                                                                                                                                                                                        | Risk of Bias        |                    |
|-----------------|--------|--------------------|-------------------|--------------|---|-------------|---|-------------------------------------------------------------------------------------------------------------------------------------------------------------------------------------------------------------------------------------------------------------------------------------------------------------------------------------------------------------------------------------------------------------------------------------------------------------------------------------------------------------------------------------------------------------------------------------------------------------------------------------------------------------------------------------------------------------------------------------------------------------------------------------------------------------------------------------------------------------------------------------|---------------------|--------------------|
|                 |        |                    |                   | Description  | n | Description | n |                                                                                                                                                                                                                                                                                                                                                                                                                                                                                                                                                                                                                                                                                                                                                                                                                                                                                     | Subjective Outcomes | Objective Outcomes |
|                 |        |                    |                   |              |   |             |   | <ul style="list-style-type: none"> <li>• [General Wellbeing Measure] Anxiety NS, data not reported</li> </ul> <p><b>Utilization</b></p> <ul style="list-style-type: none"> <li>• Total inpatient days NS, 51 vs. 47.5; P not reported</li> <li>• Nursing home days, 1.0 vs. 11.4; P≤0.05</li> <li>• Chemotherapy treatments, 1.3 vs. 0.49; P=0.03</li> <li>• Major surgical procedures, 0.09 vs. 0.01; P≤0.05</li> </ul> <p><b>Satisfaction</b></p> <ul style="list-style-type: none"> <li>• [Ware scale]: Patient satisfaction improved, data not reported; P&lt;0.01</li> </ul> <p><b>Expenditures</b></p> <ul style="list-style-type: none"> <li>• Total inpatient cost NS, mean, \$11,618 vs. \$11,614; P not reported</li> </ul> <p><b>Caregiver mood</b></p> <ul style="list-style-type: none"> <li>• [CES-D] Depression NS, data not reported</li> <li>• [General</li> </ul> |                     |                    |



**eTable 4. Trial Characteristics and Outcomes of 11 Palliative Care Interventions at Unclear Risk of Bias**

| Study (Country)                           | Design            | Patient Population                                                                        | Domains Addressed               | Intervention                                                                                                                                                                                                                                        |                                                                              | Control     |                              | Main Results                                                                                                                                                                                                                                                                                                                                                             | Risk of Bias        |                    |
|-------------------------------------------|-------------------|-------------------------------------------------------------------------------------------|---------------------------------|-----------------------------------------------------------------------------------------------------------------------------------------------------------------------------------------------------------------------------------------------------|------------------------------------------------------------------------------|-------------|------------------------------|--------------------------------------------------------------------------------------------------------------------------------------------------------------------------------------------------------------------------------------------------------------------------------------------------------------------------------------------------------------------------|---------------------|--------------------|
|                                           |                   |                                                                                           |                                 | Description                                                                                                                                                                                                                                         | n                                                                            | Description | n                            |                                                                                                                                                                                                                                                                                                                                                                          | Subjective Outcomes | Objective Outcomes |
|                                           |                   |                                                                                           |                                 |                                                                                                                                                                                                                                                     |                                                                              |             |                              | Wellbeing Measure] Anxiety improved, data not reported; P≤0.05<br><b>Caregiver satisfaction</b><br>• [Ware scale]: Caregiver satisfaction improved, data not reported; P≤0.05                                                                                                                                                                                            |                     |                    |
| Northouse et al, 2013 <sup>53</sup> (USA) | Parallel          | Advanced cancer (breast, colorectal, lung, prostate); Prognosis: ≥ 6 months; Mean age: 61 | Physical, Psychological, Social | Home-based, dyadic intervention (see Northouse et al, 2005) including home visits and phone sessions<br>1. Brief: Two 90-min home visits, and one 30-min home phone session<br>2. Extensive: Four 90-min home visits, and two 30-min phone sessions | Brief: 159 patients, 159 caregivers; Extensive: 162 patients, 162 caregivers | Usual care  | 163 patients, 163 caregivers | <b>Patient and caregiver QOL</b><br>• [FACT-G] <sup>d</sup> : Social QOL improved (F=4.28; P=0.002)<br>• [FACT-G] <sup>d</sup> : Emotional QOL (F=0.8; P=0.52)<br>• [FACT-G] <sup>d</sup> : Functional QOL (F=0.35; P=0.84)<br>• [FACT-G] <sup>d</sup> : Physical QOL (F=1.16; P=0.33)<br><b>Caregiver burden</b><br>• [Appraisal of Caregiving Scale]: (F=0.99; P=0.46) | Unclear             | N/A                |
| <b>Trials with cluster randomization</b>  |                   |                                                                                           |                                 |                                                                                                                                                                                                                                                     |                                                                              |             |                              |                                                                                                                                                                                                                                                                                                                                                                          |                     |                    |
| Jordhoy et al, 2001 <sup>54,55</sup>      | Cluster, parallel | Incurable cancer(gastrointe                                                               | Structure, Physical,            | Comprehensive palliative care                                                                                                                                                                                                                       | 235                                                                          | Usual care  | 199                          | <b>QOL</b><br>• [EORTC QLQ-                                                                                                                                                                                                                                                                                                                                              | Unclear             | Unclear            |

**eTable 4. Trial Characteristics and Outcomes of 11 Palliative Care Interventions at Unclear Risk of Bias**

| Study (Country) | Design | Patient Population                                                                                                                                               | Domains Addressed  | Intervention                                                                                                                                                               |   | Control     |   | Main Results                                                                                                                                                                                                                                                                                                                                                                                                                                                                                                                                                                                                                                                                                                    | Risk of Bias        |                    |
|-----------------|--------|------------------------------------------------------------------------------------------------------------------------------------------------------------------|--------------------|----------------------------------------------------------------------------------------------------------------------------------------------------------------------------|---|-------------|---|-----------------------------------------------------------------------------------------------------------------------------------------------------------------------------------------------------------------------------------------------------------------------------------------------------------------------------------------------------------------------------------------------------------------------------------------------------------------------------------------------------------------------------------------------------------------------------------------------------------------------------------------------------------------------------------------------------------------|---------------------|--------------------|
|                 |        |                                                                                                                                                                  |                    | Description                                                                                                                                                                | n | Description | n |                                                                                                                                                                                                                                                                                                                                                                                                                                                                                                                                                                                                                                                                                                                 | Subjective Outcomes | Objective Outcomes |
| (Norway)        |        | stinal, lung, breast and female genitals, prostate and male genitals, kidney or vesical or ureter, lymphomas, skin, other); Prognosis: 2-9 months; Median age:70 | Psychological, EOL | coordinated by hospital-based palliative medicine unit, providing inpatient, outpatient, and home-based services, as well as palliative care education for non-specialists |   |             |   | <p>C30 Global Health]<sup>a</sup>: NS standardized AUC (-1.1 vs 1.1; P = 0.48)</p> <p><b>Symptom burden</b></p> <ul style="list-style-type: none"> <li>• [EORTC QLQ-C30 fatigue]<sup>a</sup>: NS standardized AUC (4.6 vs 1.2; P = 0.23)</li> <li>• [EORTC QLQ-C30 nausea/vomiting]<sup>a</sup>: NS standardized AUC (-0.7 vs 2.1; P = 0.27)</li> <li>• [EORTC QLQ-C30 pain]<sup>a</sup>: NS standardized AUC (-3.9 vs -1.6; P = 0.35)</li> <li>• [EORTC QLQ-C30 dyspnea]<sup>a</sup>: NS standardized AUC (2.8 vs 1.9; P = 0.95)</li> <li>• [EORTC QLQ-C30 diarrhea]<sup>a</sup>: NS standardized AUC (-0.4 vs -2.0; P = 0.68)</li> <li>• [EORTC QLQ-C30 constipation]<sup>a</sup>: NS standardized</li> </ul> |                     |                    |

**eTable 4. Trial Characteristics and Outcomes of 11 Palliative Care Interventions at Unclear Risk of Bias**

| Study (Country) | Design | Patient Population | Domains Addressed | Intervention |   | Control     |   | Main Results                                                                                                                                                                                                                                                                                                                                                                                                                                                                                                                                                                                                                                                                                                                                                                                                         | Risk of Bias        |                    |
|-----------------|--------|--------------------|-------------------|--------------|---|-------------|---|----------------------------------------------------------------------------------------------------------------------------------------------------------------------------------------------------------------------------------------------------------------------------------------------------------------------------------------------------------------------------------------------------------------------------------------------------------------------------------------------------------------------------------------------------------------------------------------------------------------------------------------------------------------------------------------------------------------------------------------------------------------------------------------------------------------------|---------------------|--------------------|
|                 |        |                    |                   | Description  | n | Description | n |                                                                                                                                                                                                                                                                                                                                                                                                                                                                                                                                                                                                                                                                                                                                                                                                                      | Subjective Outcomes | Objective Outcomes |
|                 |        |                    |                   |              |   |             |   | <p>AUC (-6.7 vs -0.5; P = 0.12)</p> <p><b>Survival</b></p> <ul style="list-style-type: none"> <li>• Median, 99 days vs. 127 days; P=0.1</li> </ul> <p><b>Mood</b></p> <ul style="list-style-type: none"> <li>• [Impact of Event Scale]<sup>a</sup>: Avoidance SAUC I -1.5 vs. C -2.0, P=0.88; Intrusion SAUC I -1.5 vs. C -2.6, P=0.29</li> </ul> <p><b>Utilization</b></p> <ul style="list-style-type: none"> <li>• [Time spent at home in last month of life]<sup>a</sup>: NS (52% vs 59%, P=0.15)</li> <li>• [Time in nursing homes during trial] decreased (3.0% vs 7.4%; P&lt;0.05)</li> <li>• [Time in nursing homes during the last month of life] decreased (mean days, 7.2% vs. 14.6%; P&lt;0.05)</li> <li>• [Admission to nursing home during the last month of life] NS (13% vs 24%, p=0.08 in</li> </ul> |                     |                    |

**eTable 4. Trial Characteristics and Outcomes of 11 Palliative Care Interventions at Unclear Risk of Bias**

| Study (Country)                                    | Design            | Patient Population                                                                                                                       | Domains Addressed                      | Intervention                                                                                                                                                                                                                                                  |      | Control     |      | Main Results                                                                                                                                                                                                                                                                                                                 | Risk of Bias        |                    |
|----------------------------------------------------|-------------------|------------------------------------------------------------------------------------------------------------------------------------------|----------------------------------------|---------------------------------------------------------------------------------------------------------------------------------------------------------------------------------------------------------------------------------------------------------------|------|-------------|------|------------------------------------------------------------------------------------------------------------------------------------------------------------------------------------------------------------------------------------------------------------------------------------------------------------------------------|---------------------|--------------------|
|                                                    |                   |                                                                                                                                          |                                        | Description                                                                                                                                                                                                                                                   | n    | Description | n    |                                                                                                                                                                                                                                                                                                                              | Subjective Outcomes | Objective Outcomes |
|                                                    |                   |                                                                                                                                          |                                        |                                                                                                                                                                                                                                                               |      |             |      | adjusted model)<br>• [Inpatient time during study] NS (5.0 vs 9.3, P not reported)<br>• [Inpatient days during last month of life] NS (2.2 vs 4.3, P not reported)<br><b>Site of death<sup>a</sup>:</b><br>• Increased death at home (25% vs. 15%; P=0.02)<br>• Decreased nursing home deaths (9% vs. 21%; P<0.01)           |                     |                    |
| The SUPPORT Investigators 1995 <sup>56</sup> (USA) | Cluster, parallel | Adults hospitalized with ≥ one of nine life-threatening diagnoses: Acute organ system failure (50%), chronic disease (29%); Mean age: 65 | Physical, Psychological, Social, Legal | Nurse-led, patient-tailored intervention to improve communication by providing timely and reliable prognostic information, by eliciting and documenting patient/family preferences and understanding of diagnosis, prognosis and treatment, and to facilitate | 2652 | Usual care  | 2152 | <b>Symptom burden</b><br>• [Scale not reported]: Pain NS (adjusted ratio, 1.15 [95% CI, 1.00, 1.33])<br><b>ACP</b><br>• Time until DNR order entered NS (adjusted ratio, 1.02 [95% CI, 0.90, 1.15])<br>• Physician-patient DNR agreement NS (adjusted ratio, 1.22 [95% CI, 0.99, 1.49])<br><b>Expenditures</b><br>• Hospital | Unclear             | Unclear            |

**eTable 4. Trial Characteristics and Outcomes of 11 Palliative Care Interventions at Unclear Risk of Bias**

| Study (Country) | Design | Patient Population | Domains Addressed | Intervention   |   | Control     |   | Main Results                                                                                                                                                                                                                                                                                          | Risk of Bias        |                    |
|-----------------|--------|--------------------|-------------------|----------------|---|-------------|---|-------------------------------------------------------------------------------------------------------------------------------------------------------------------------------------------------------------------------------------------------------------------------------------------------------|---------------------|--------------------|
|                 |        |                    |                   | Description    | n | Description | n |                                                                                                                                                                                                                                                                                                       | Subjective Outcomes | Objective Outcomes |
|                 |        |                    |                   | family meeting |   |             |   | expenditures NS, adjusted ratio, 1.05 [95% CI, 0.99, 1.12])<br><b>Utilization</b><br>• Days in ICU, comatose, or receiving mechanical ventilation NS (adjusted ratio, 0.97 [95% CI, 0.87, 1.07])<br><b>Survival</b><br>• Six-month mortality NS (adjusted relative hazard, 0.95 [95% CI, 0.87, 1.04]) |                     |                    |

Legend:

- <sup>a</sup> Primary outcome measure; otherwise, not defined in article.
- <sup>b</sup> Explicitly labeled as a pilot (or hypothesis generating, not hypothesis testing) study.
- <sup>c</sup> Study does not provide number of caregivers in each experimental condition.
- <sup>d</sup> Data analyzed and presented at dyad level.

ES, effect size. NS, not significant. d, Hedges' d. g, Hedges' g. h, Hedges' h. OR, odds ratio. CI, confidence interval. LOS, length of stay. MD, medical doctor. RN, registered nurse. PC, palliative care. IV, intravenous. ACP, advance care planning. CHF, congestive heart failure. QOL, quality of life. KCCQ, Kansas City Cardiomyopathy Questionnaire. PHQ-9, Patient Health Questionnaire 9. COPD, chronic obstructive pulmonary disease. ED, emergency department. MS, multiple sclerosis. EOL, end of life. ICU, intensive care unit. FACT-G, Functional Assessment of Cancer Therapy-General. EORTC QLQ-C30, European Organization for Research and Treatment of Cancer Quality of Life Questionnaire. VAS, visual analog scale. CESD, Center for Epidemiologic Studies Depression Scale. AUC, area under curve. SAUC, standardized area under curve. DNR, do not resuscitate.

Structure, Structure and processes of care. Psychological, Psychological and psychiatric aspects of care. Social, Social aspects of care. Cultural, Cultural aspects of care. Spiritual, Spiritual, religious, and existential aspects of care. EOL, Care of the imminently dying patient. Legal, Ethical and legal aspects of care.

Note: Primary outcome reported, regardless of whether it is one of our pre-specified outcomes of interest. If no primary outcome specified in paper, and the outcome is not one of our outcomes of interest, it is not reported here. All comparisons are intervention versus control, if not otherwise specified. Ambulatory interventions refer to those interventions where patients were required to travel to either an outpatient clinic or an intervention delivery site. Subjective outcomes include all patient-reported outcomes (e.g., QOL, symptoms, mood), whereas objective outcomes include those outcomes which are not subject to detection bias (e.g., survival, healthcare utilization and expenditures abstracted from clinical or administrative records).

**eTable 5. Risk of Bias Assessments of 43 Randomized Clinical Trials of Palliative Care Interventions**

Trials with patient-level randomization

| First author, year                         | Sequence generation | Allocation concealment | Blinding of participants and personnel | Blinding of subjective outcomes | Blinding of objective outcomes | Incomplete outcome data | Selective outcome reporting | Other sources of bias | Summary of bias: subjective outcomes | Summary of bias: objective outcomes |
|--------------------------------------------|---------------------|------------------------|----------------------------------------|---------------------------------|--------------------------------|-------------------------|-----------------------------|-----------------------|--------------------------------------|-------------------------------------|
| Ahronheim JC et al., 2000 <sup>42</sup>    | Low                 | Unclear                | High                                   | N/A                             | Low                            | Low                     | Low                         | Low                   | Unclear                              | Unclear                             |
| Aiken LS et al., 2006 <sup>11</sup>        | Low                 | Low                    | High                                   | High                            | Low                            | High                    | High                        | High                  | High                                 | High                                |
| Bakitas M et al., 2009 <sup>4</sup>        | Low                 | Low                    | High                                   | High                            | Low                            | Low                     | Low                         | Low                   | Low                                  | Low                                 |
| Bakitas MA, 2015 <sup>12</sup>             | Low                 | Low                    | High                                   | High                            | Low                            | Low                     | Low                         | High                  | High                                 | High                                |
| Bekelman DB et al., 2015 <sup>43</sup>     | Low                 | Low                    | High                                   | High                            | Low                            | Low                     | Low                         | Unclear               | Unclear                              | Unclear                             |
| Brannstrom M et al., 2014 <sup>14</sup>    | Unclear             | Low                    | High                                   | High                            | Low                            | High                    | High                        | High                  | High                                 | High                                |
| Brumley R et al., 2007 <sup>44</sup>       | Low                 | Low                    | High                                   | High                            | Low                            | Low                     | Unclear                     | Unclear               | Unclear                              | Unclear                             |
| Chapman DG et al., 2007 <sup>16</sup>      | Low                 | Unclear                | High                                   | High                            | N/A                            | Unclear                 | Unclear                     | High                  | High                                 | N/A                                 |
| Cheung W et al., 2010 <sup>17</sup>        | Low                 | Low                    | High                                   | High                            | Low                            | High                    | Low                         | High                  | High                                 | High                                |
| Clark MM et al., 2013 <sup>18</sup>        | Low                 | Unclear                | High                                   | High                            | N/A                            | High                    | Low                         | Low                   | High                                 | N/A                                 |
| Dyar S et al., 2012 <sup>19</sup>          | Low                 | Unclear                | High                                   | High                            | N/A                            | High                    | High                        | High                  | High                                 | N/A                                 |
| Edmonds P et al., 2010 <sup>45</sup>       | Low                 | Low                    | High                                   | High                            | Low                            | Unclear                 | Low                         | Unclear               | Unclear                              | Unclear                             |
| Engelhardt JB et al., 2006 <sup>20</sup>   | Low                 | Low                    | High                                   | High                            | Low                            | High                    | Unclear                     | High                  | High                                 | High                                |
| Farquhar MC et al., 2014 <sup>21</sup>     | Low                 | Low                    | High                                   | High                            | Low                            | High                    | Low                         | Low                   | High                                 | High                                |
| Farquhar MC et al., 2016 <sup>22</sup>     | Low                 | Low                    | High                                   | High                            | Low                            | High                    | Low                         | Low                   | High                                 | High                                |
| Gade G et al., 2008 <sup>48</sup>          | Low                 | Unclear                | High                                   | High                            | Low                            | Low                     | Low                         | Unclear               | Unclear                              | Unclear                             |
| Given B et al., 2002 <sup>57</sup>         | Unclear             | Unclear                | High                                   | High                            | N/A                            | Unclear                 | High                        | Low                   | High                                 | N/A                                 |
| Grande GE et al., 1999 <sup>24</sup>       | Low                 | Low                    | High                                   | High                            | Low                            | Unclear                 | Low                         | High                  | High                                 | High                                |
| Grudzen C et al., et al 2016 <sup>49</sup> | Low                 | Low                    | High                                   | High                            | Low                            | Low                     | Low                         | Unclear               | Unclear                              | Unclear                             |
| Hanks GW et al., 2002 <sup>50</sup>        | Low                 | Low                    | High                                   | High                            | Low                            | Unclear                 | Unclear                     | Unclear               | Unclear                              | Unclear                             |
| Higginson IJ et al., 2014 <sup>6</sup>     | Low                 | Low                    | High                                   | High                            | Low                            | Low                     | Low                         | Low                   | Low                                  | Low                                 |
| Hopp et al., 2016 <sup>25</sup>            | Unclear             | Unclear                | High                                   | N/A                             | Low                            | Low                     | Unclear                     | High                  | N/A                                  | High                                |
| Hughes SL et al., 1992 <sup>26</sup>       | Low                 | Unclear                | High                                   | High                            | Low                            | High                    | Unclear                     | High                  | High                                 | High                                |
| Kane RL et al., 1984 <sup>51</sup>         | Low                 | Unclear                | High                                   | High                            | Low                            | Unclear                 | Unclear                     | Low                   | Unclear                              | Unclear                             |
| Lowther K et al., 2015 <sup>7</sup>        | Low                 | Low                    | High                                   | High                            | N/A                            | Low                     | Low                         | Low                   | Low                                  | N/A                                 |
| McCorkle R et al., 1989 <sup>27</sup>      | Low                 | Low                    | High                                   | High                            | Low                            | High                    | Unclear                     | Low                   | High                                 | High                                |
| Northouse LL et al., 2005 <sup>28</sup>    | Low                 | Low                    | High                                   | High                            | N/A                            | Low                     | High                        | Low                   | High                                 | N/A                                 |
| Northouse LL et al., 2007 <sup>8</sup>     | Low                 | Low                    | High                                   | High                            | N/A                            | Low                     | Low                         | Low                   | Low                                  | N/A                                 |
| Northouse LL et al., 2013 <sup>53</sup>    | Low                 | Low                    | High                                   | High                            | N/A                            | Low                     | Unclear                     | Low                   | Unclear                              | N/A                                 |
| Pantilat SZ et al., 2010 <sup>29</sup>     | Unclear             | Unclear                | High                                   | High                            | N/A                            | Unclear                 | Unclear                     | High                  | High                                 | N/A                                 |
| Radwany SM et al., 2014 <sup>30</sup>      | Low                 | Low                    | High                                   | High                            | Low                            | High                    | Unclear                     | Low                   | High                                 | High                                |
| Rummans TA et al., 2006 <sup>10</sup>      | Low                 | Low                    | High                                   | High                            | N/A                            | Low                     | Low                         | Low                   | Low                                  | N/A                                 |
| Sidebottom AC et al., 2015 <sup>31</sup>   | Unclear             | Unclear                | High                                   | High                            | Low                            | Unclear                 | High                        | High                  | High                                 | High                                |
| Steel JL et al., 2016 <sup>32</sup>        | Low                 | Low                    | High                                   | High                            | Low                            | Low                     | High                        | High                  | High                                 | High                                |

**eTable 5. Risk of Bias Assessments of 43 Randomized Clinical Trials of Palliative Care Interventions**

Trials with patient-level randomization

| First author, year                   | Sequence generation | Allocation concealment | Blinding of participants and personnel | Blinding of subjective outcomes | Blinding of objective outcomes | Incomplete outcome data | Selective outcome reporting | Other sources of bias | Summary of bias: subjective outcomes | Summary of bias: objective outcomes |
|--------------------------------------|---------------------|------------------------|----------------------------------------|---------------------------------|--------------------------------|-------------------------|-----------------------------|-----------------------|--------------------------------------|-------------------------------------|
| Temel JS et al., 2010 <sup>33</sup>  | Low                 | Low                    | High                                   | High                            | Low                            | Low                     | High                        | Low                   | Low                                  | High/Low*                           |
| Wallen GR et al., 2012 <sup>36</sup> | Low                 | Unclear                | High                                   | High                            | Low                            | High                    | Unclear                     | High                  | High                                 | High                                |
| Wong FK et al., 2016 <sup>37</sup>   | Low                 | Low                    | Unclear                                | Low                             | Low                            | Low                     | High                        | Low                   | High                                 | High                                |
| Zimmer JG et al., 1984 <sup>39</sup> | Low                 | Unclear                | High                                   | High                            | Low                            | Unclear                 | High                        | Low                   | High                                 | High                                |

Trials with cluster-level randomization

| First author, year                            | Sequence Generation | Recruitment Bias | Baseline Imbalance | Blinding of participants and | Blinding of subjective | Blinding of objective outcomes | Incomplete outcome data | Selective outcome reporting | Analysis accounted for clustering | Other sources of bias | Summary of bias: subjective outcomes | Summary of bias: objective outcomes |
|-----------------------------------------------|---------------------|------------------|--------------------|------------------------------|------------------------|--------------------------------|-------------------------|-----------------------------|-----------------------------------|-----------------------|--------------------------------------|-------------------------------------|
| Jordhoy MS et al., 2001 <sup>54</sup>         | Unclear             | Unclear          | Low                | High                         | High                   | Low                            | Low                     | Low                         | Low                               | Low                   | Unclear                              | Unclear                             |
| McCorkle R et al., 2015 <sup>40</sup>         | Low                 | High             | High               | High                         | High                   | N/A                            | Low                     | High                        | Low                               | Low                   | High                                 | N/A                                 |
| Rabow MW et al., 2004 <sup>41</sup>           | Low                 | High             | Low                | High                         | High                   | Low                            | Low                     | Low                         | High                              | Low                   | High                                 | High                                |
| The SUPPORT Investigators, 1995 <sup>56</sup> | Unclear             | Unclear          | Low                | High                         | High                   | Low                            | Low                     | Low                         | Unclear                           | Low                   | Unclear                              | Unclear                             |
| Zimmermann C et al., 2014 <sup>3</sup>        | Low                 | High             | Low                | High                         | High                   | Low                            | Low                     | Low                         | Low                               | Low                   | Low                                  | Low                                 |

**eTable 6. Risk of Bias Judgments in 43 Randomized Clinical Trials of Palliative Care Interventions**

| Risk Domain                                               | Low risk of bias, No. of trials(%) | High risk of bias, No. of trials(%) | Unclear risk of bias, No. of trials(%) | Not applicable, No. of trials(%) |
|-----------------------------------------------------------|------------------------------------|-------------------------------------|----------------------------------------|----------------------------------|
| Trials with patient-level randomization (38 trials)       |                                    |                                     |                                        |                                  |
| Sequence generation (selection bias)                      | 33 (87)                            | 0 (0)                               | 5 (13)                                 | 0 (0)                            |
| Allocation concealment (selection bias)                   | 25 (66)                            | 0 (0)                               | 13 (34)                                | 0 (0)                            |
| Blinding of participants and personnel (performance bias) | 0 (0)                              | 37 (97)                             | 1 (3)                                  | 0 (0)                            |
| Blinding of subjective outcomes (detection bias)          | 1 (3)                              | 35 (92)                             | 0 (0)                                  | 2 (5)                            |
| Blinding of objective outcomes (detection bias)           | 28 (74)                            | 0 (0)                               | 0 (0)                                  | 10 (26)                          |
| Incomplete outcome data (attrition bias)                  | 17 (45)                            | 12 (32)                             | 9 (24)                                 | 0 (0)                            |
| Selective outcome reporting (reporting bias)              | 16 (42)                            | 10 (26)                             | 12 (32)                                | 0 (0)                            |
| Other sources of bias                                     | 18 (47)                            | 14 (37)                             | 6 (16)                                 | 0(0)                             |
| Trials with cluster-level randomization (5 trials)        |                                    |                                     |                                        |                                  |
| Sequence generation (selection bias)                      | 3 (60)                             | 0 (0)                               | 2 (40)                                 | 0 (0)                            |
| Recruitment bias (selection bias)                         | 0 (0)                              | 3 (60)                              | 2 (40)                                 | 0 (0)                            |
| Baseline imbalance (selection bias)                       | 4 (80)                             | 1 (20)                              | 0 (0)                                  | 0 (0)                            |
| Blinding of participants and personnel (performance bias) | 0 (0)                              | 5 (100)                             | 0 (0)                                  | 0 (0)                            |
| Blinding of subjective outcomes (detection bias)          | 0 (0)                              | 5 (100)                             | 0 (0)                                  | 0 (0)                            |
| Blinding of objective outcomes (detection bias)           | 4 (80)                             | 0 (0)                               | 0 (0)                                  | 1 (20)                           |
| Incomplete outcome data (attrition bias)                  | 5 (100)                            | 0 (0)                               | 0 (0)                                  | 0 (0)                            |
| Selective outcome reporting (reporting bias)              | 4 (80)                             | 1 (20)                              | 0 (0)                                  | 0 (0)                            |
| Cluster-appropriate analysis                              | 3 (60)                             | 1 (20)                              | 1 (20)                                 | 0 (0)                            |
| Other sources of bias                                     | 5 (100)                            | 0 (0)                               | 0 (0)                                  | 0 (0)                            |



**eFigure 1. Palliative Care Domains Addressed in 43 Randomized Clinical Trials of Palliative Care Interventions**

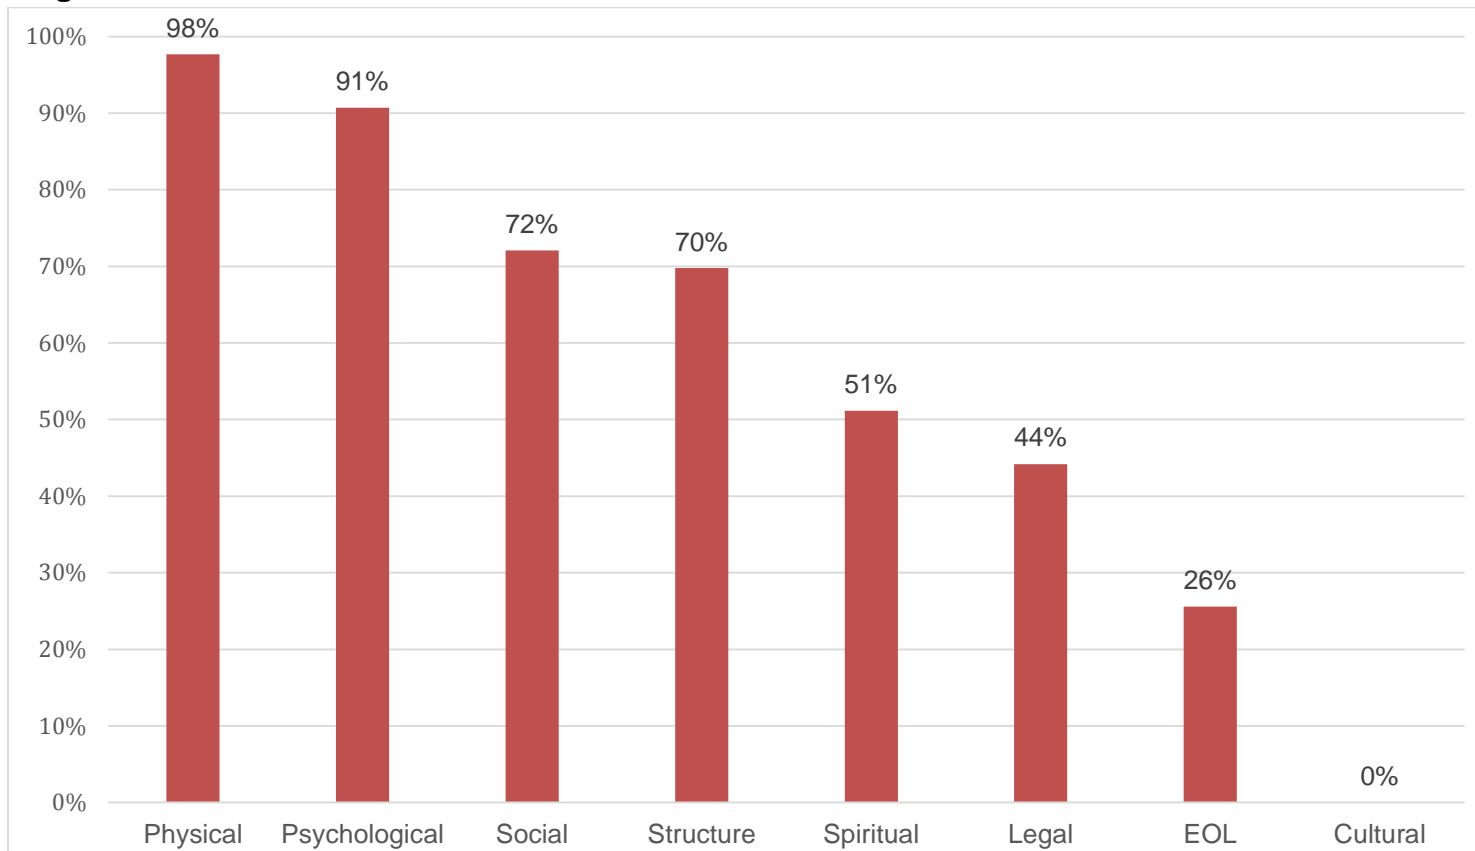

Percent of Interventions Addressing Domain

Note: EOL, end of life.

**eFigure 2. Association of Palliative Care and Patient Quality of Life at 1-3 Month Follow-up Stratified by Disease**

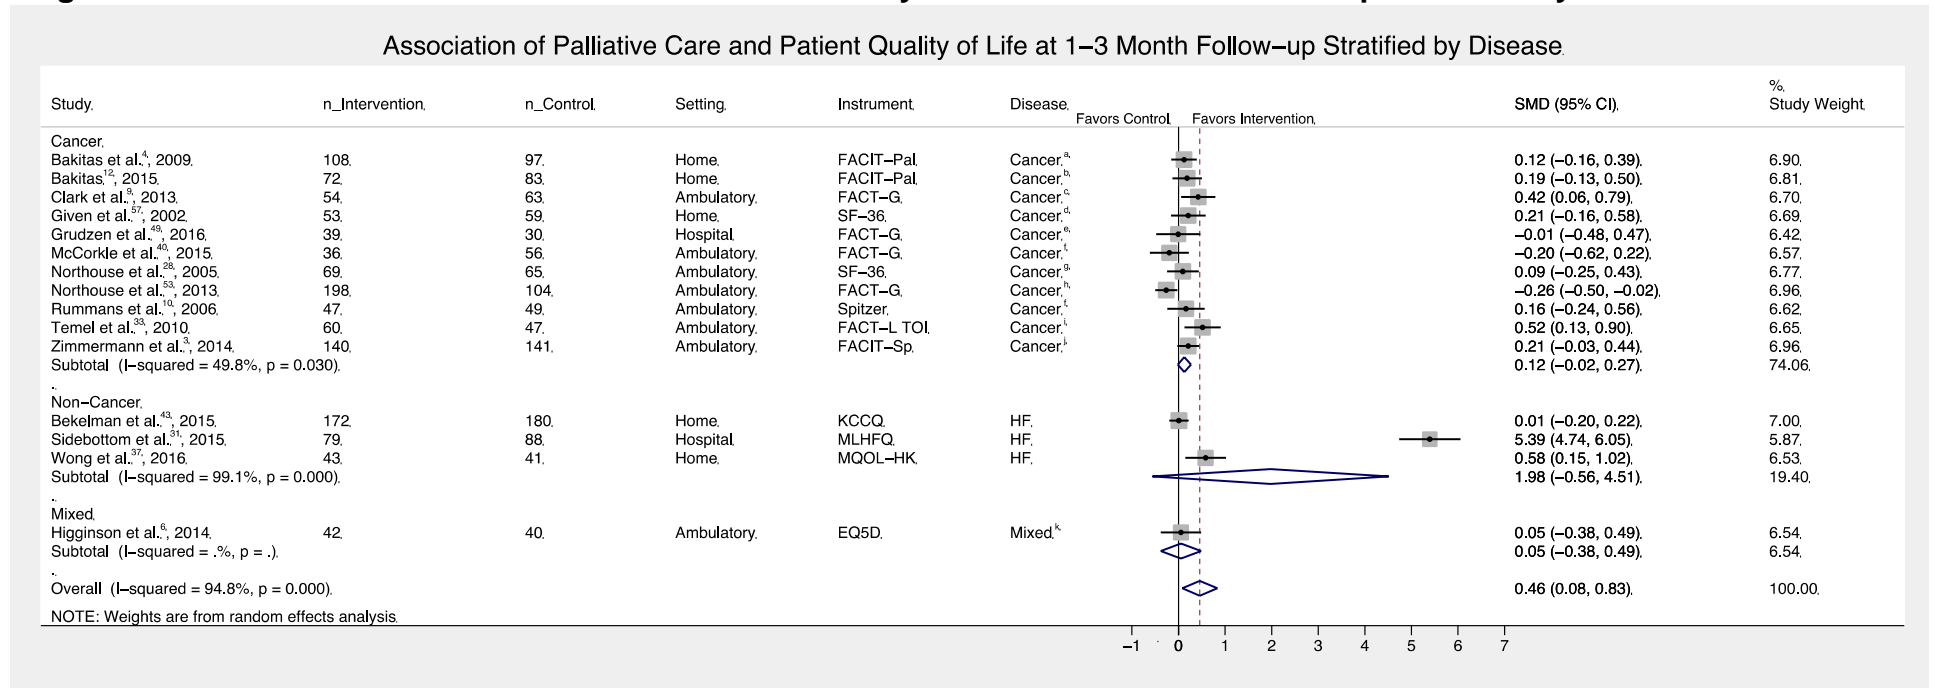

Note: Cancer: P-value for pooled SMD=0.09, Tau<sup>2</sup>=0.03, Q=19.93; Non-cancer: P-value for pooled SMD=0.13, Tau<sup>2</sup>=4.96, Q=232.80; Mixed: P-value for pooled SMD=0.81, Tau<sup>2</sup><0.0001, Q<0.0001. Sample sizes in the figure are the number of patients analyzed corresponding to the studies at the specific time points.

Disease status: a: gastrointestinal, lung, genitourinary, and breast cancers. b: solid or hematological cancer. c: brain, gastrointestinal, head/neck, lung, and other cancers. d: breast, colon, lung, gynecological cancers, and lymphoma. e: breast, colon, lung, and other cancers. f: not further specified. g: breast cancer. h: breast, colon, lung, and prostate cancers. i: non-small cell lung cancer. j: lung, gastrointestinal, genitourinary, breast, and gynecological cancer. k: cancer, COPD, HF, ILD, ALS.

Legend: Data dots within shaded squares indicate SMDs from trials, with horizontal lines indicating 95% CI (confidence interval). The size of the shaded squares indicates study weight. Diamonds represent pooled SMDs and 95% CIs. The vertical dashed line indicates the pooled effect estimate, and the solid vertical line depicts a null effect (i.e., SMD = 0).

Abbreviations: SMD, standardized mean difference. SF-36, Short Form-36. EQ5D, EuroQol 5 Dimensions Questionnaire. FACIT-Pal, Functional Assessment of Chronic Illness Therapy-Palliative. FACT-L TOI, Functional Assessment of Cancer Therapy-Lung Treatment Outcome Index. FACT-G, Functional Assessment of Cancer Therapy- General. FACIT-Sp, Functional Assessment of Chronic Illness Therapy-Spirituality. KCCQ, Kansas City Cardiomyopathy Questionnaire. MLHFQ, Minnesota Living with Heart Failure Questionnaire. MQOL-HK, McGill Quality of Life Questionnaire – Hong Kong adaptation. HF, heart failure. COPD, chronic obstructive pulmonary disease. ILD, interstitial lung disease. ALS, amyotrophic lateral sclerosis.

Note: Ambulatory: P-value for pooled SMD=0.25, Tau<sup>2</sup>= 0.05, Q=19.14; Hospital: P-value for pooled SMD=0.32, Tau<sup>2</sup>=14.49, Q=169.31; Home: P-value for pooled SMD=0.05, Tau<sup>2</sup>=0.01, Q=5.67. Sample sizes in the figure are the number of patients analyzed corresponding to the studies at the specific time points.

Disease status: a: gastrointestinal, lung, genitourinary, and breast cancers. b: solid or hematological cancer. c: breast, colon, lung, gynecological cancers, and lymphoma. d: brain, GI, head/neck, lung, and other cancers. e: cancer, COPD, HF, ILD, ALS. f: not further specified. g: breast cancer. h: breast, colon, lung, and prostate cancers. i: non-small cell lung cancer. j: lung, gastrointestinal, genitourinary, breast, and gynecological cancers. k: breast, colon, lung, and other cancers.

**eFigure 3. Association of Palliative Care and Patient Quality of Life at 1-3 Month Follow-up Stratified by Setting**

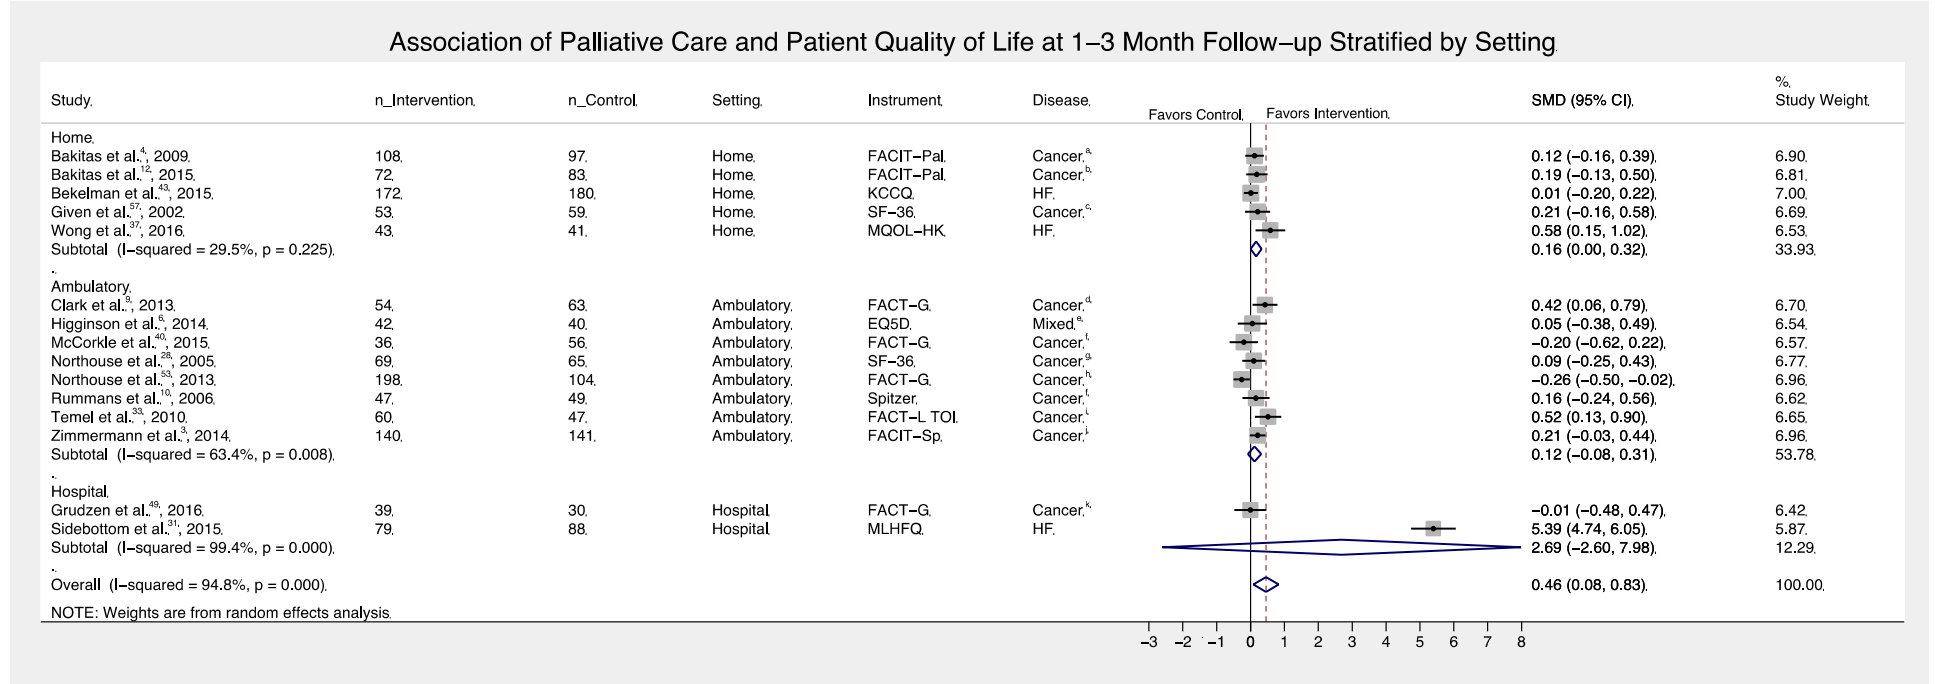

Legend: Data dots within shaded squares indicate SMDs from trials, with horizontal lines indicating 95% CI (confidence interval). The size of the shaded squares indicates study weight. Diamonds represent pooled SMDs and 95% CIs. The vertical dashed line indicates the pooled effect estimate, and the solid vertical line depicts a null effect (i.e., SMD = 0).

Abbreviations: SMD, standardized mean difference. SF-36, Short Form-36. EQ5D, EuroQol 5 Dimensions Questionnaire. FACIT-Pal, Functional Assessment of Chronic Illness Therapy-Palliative. FACT-L TOI, Functional Assessment of Cancer Therapy-Lung Treatment Outcome Index. FACT-G, Functional Assessment of Cancer Therapy- General. FACIT-Sp, Functional Assessment of Chronic Illness Therapy-Spirituality. KCCQ, Kansas City Cardiomyopathy Questionnaire. MLHFQ, Minnesota Living with Heart Failure Questionnaire. MQOL-HK, McGill Quality of Life Questionnaire – Hong Kong adaptation. HF, heart failure. COPD, chronic obstructive pulmonary disease. ILD, interstitial lung disease. ALS, amyotrophic lateral sclerosis.

**eFigure 4. Sensitivity Analysis of the Association Between Palliative Care and Patient Quality of Life Assessed at a Discrete Time Point (3 Months)**

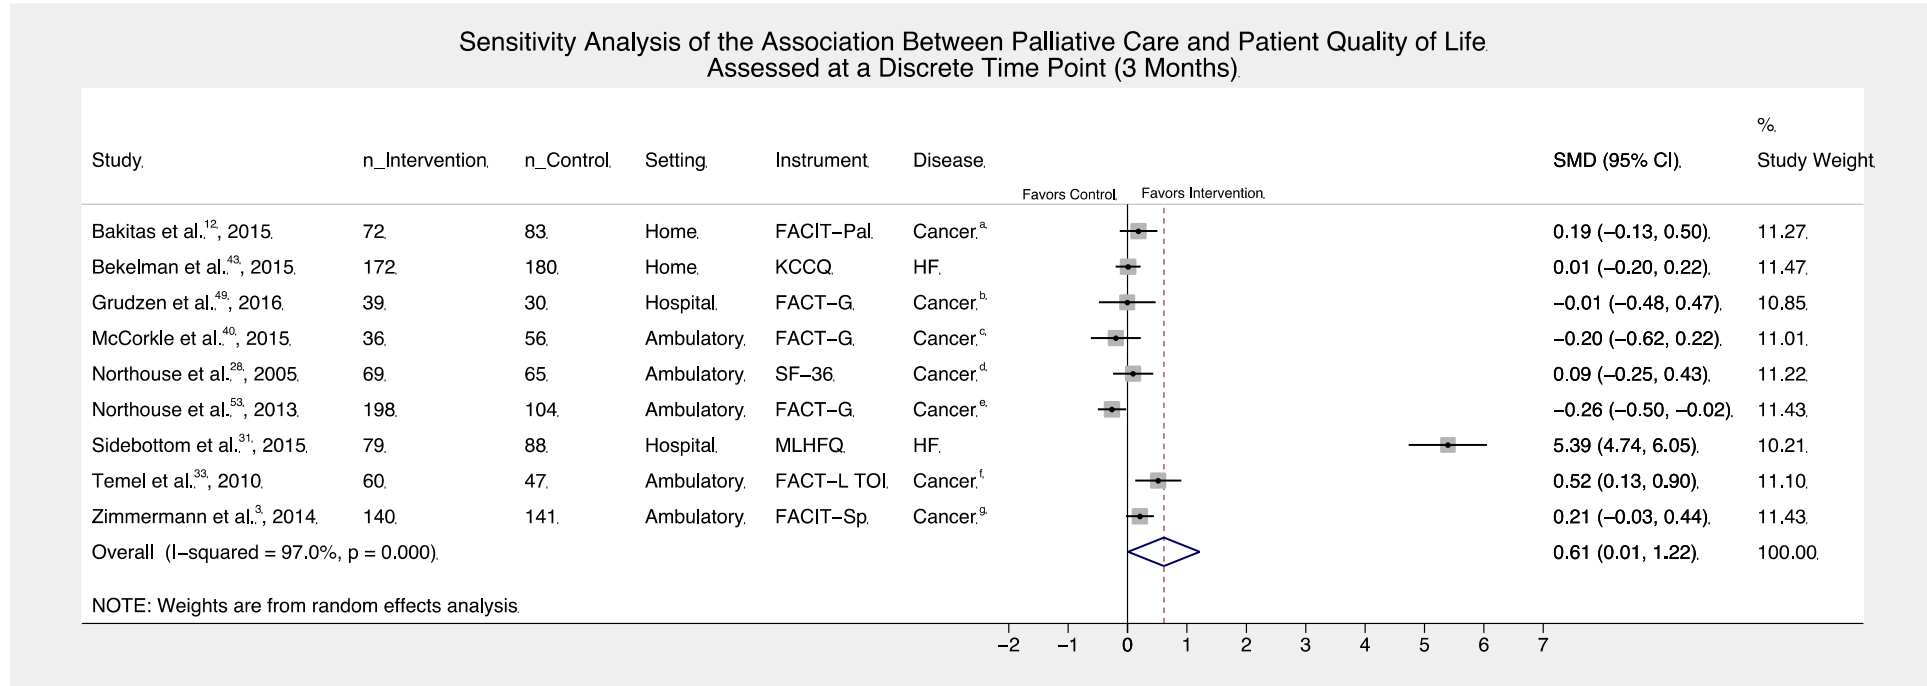

Note: P-value for pooled SMD=0.05, Tau<sup>2</sup>=0.81 Q=262.75. Sample sizes in the figure are the number of patients analyzed corresponding to the studies at the specific time points.

Disease status: a: solid or hematological cancer. b: breast, colon, lung, and other cancers. c: not further specified. d: breast cancer. e: breast, colon, lung, and prostate cancers. f: non-small cell lung cancer. g: lung, gastrointestinal, genitourinary, breast, and gynecological cancers.

Legend: Data dots within shaded squares indicate SMDs from trials, with horizontal lines indicating 95% CI (confidence interval). The size of the shaded squares indicates study weight. Diamonds represent pooled SMDs and 95% CIs. The vertical dashed line indicates the pooled effect estimate, and the solid vertical line depicts a null effect (i.e., SMD = 0).

Abbreviations: SMD, standardized mean difference. SF-36, Short Form-36. FACIT-Pal, Functional Assessment of Chronic Illness Therapy-Palliative. FACT-L TOI, Functional Assessment of Cancer Therapy-Lung Treatment Outcome Index. FACT-G, Functional Assessment of Cancer Therapy- General. FACIT-Sp, Functional Assessment of Chronic Illness Therapy-Spirituality. KCCQ, Kansas City Cardiomyopathy Questionnaire. MLHFQ, Minnesota Living with Heart Failure Questionnaire. HF, heart failure.

## eFigure 5. Sensitivity Analysis of the Association Between Palliative Care and Patient Quality of Life Assessed at a Discrete Time Point (6 Months)

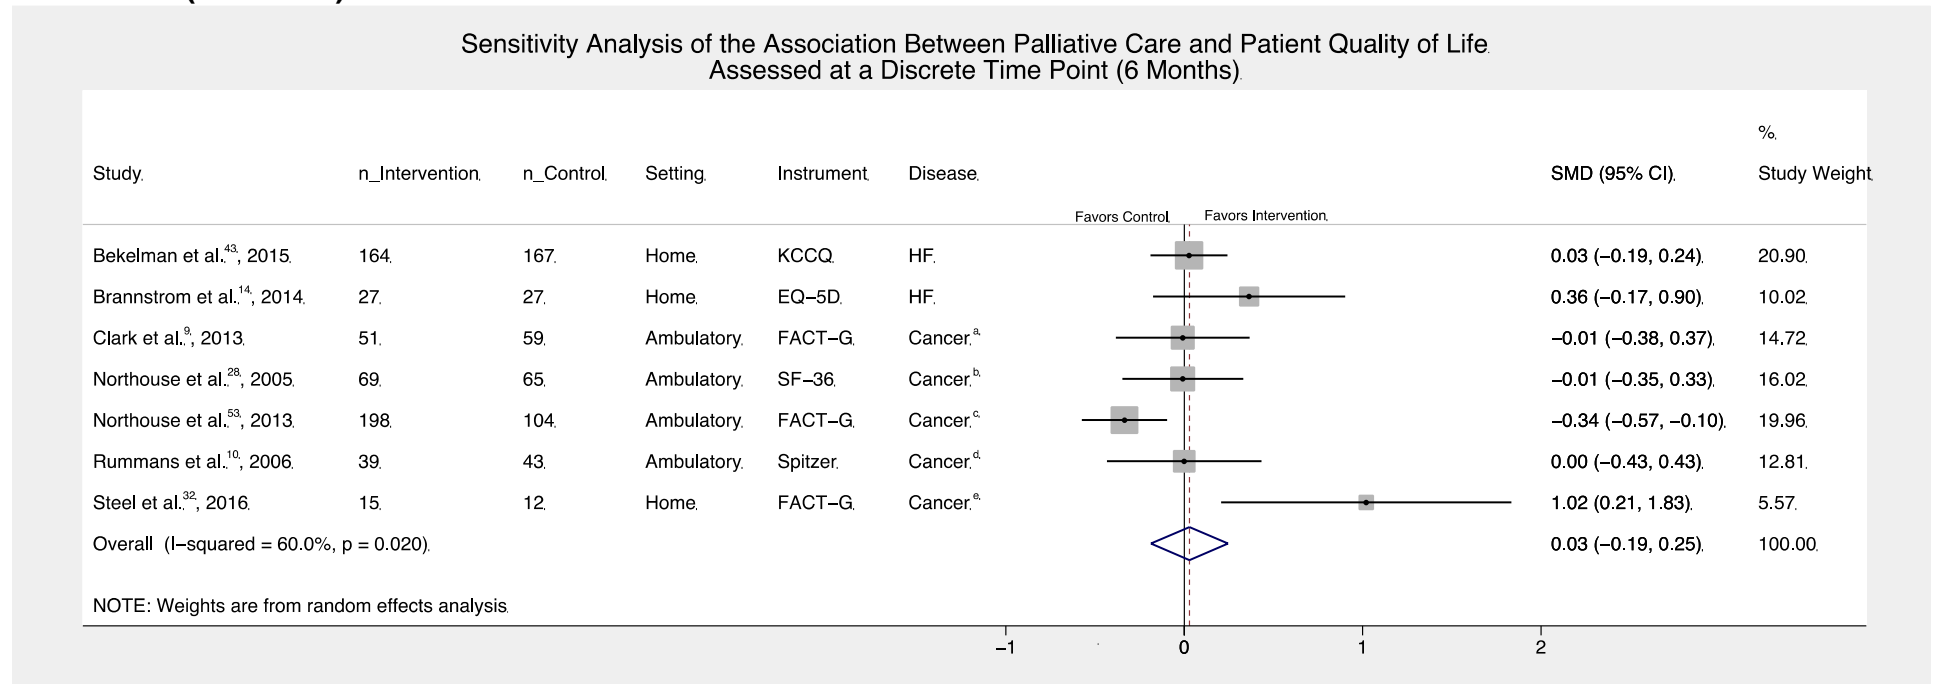

Note: P-value for pooled SMD=0.79, Tau<sup>2</sup>=0.05 Q=15.01. Sample sizes in the figure are the number of patients analyzed corresponding to the studies at the specific time points.

Disease status: a: brain, gastrointestinal, head/neck, lung, and other cancers. b: breast cancer. c: breast, colon, lung, and prostate cancers. d: not further specified. e: upper gastrointestinal cancer.

Legend: Data dots within shaded squares indicate SMDs from trials, with horizontal lines indicating 95% CI (confidence interval). The size of the shaded squares indicates study weight. Diamonds represent pooled SMDs and 95% CIs. The vertical dashed line indicates the pooled effect estimate, and the solid vertical line depicts a null effect (i.e., SMD = 0).

Abbreviations: SMD, standardized mean difference. SF-36, Short Form-36. EQ-5D, EuroQol 5 Dimensions Questionnaire. FACT-G, Functional Assessment of Cancer Therapy- General. KCCQ, Kansas City Cardiomyopathy Questionnaire. HF, heart failure .

**eFigure 6. Assessment of Publication Bias Regarding Quality of Life at 1-3 Month Follow-up in Randomized Clinical Trials of Palliative Care Interventions**

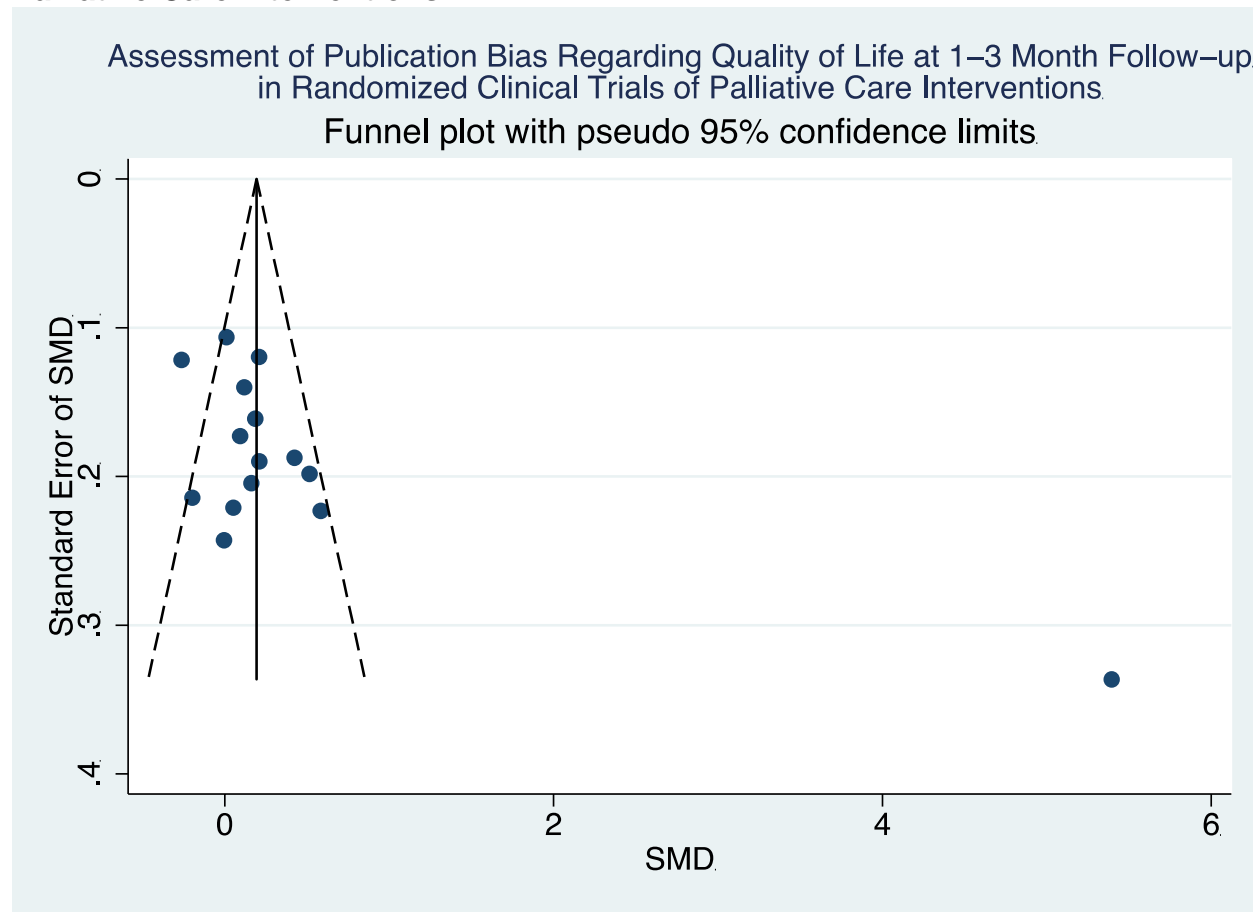

Note: Egger's test bias estimate (SE): 8.25 (3.39), P=0.03.

Legend: Dotted lines indicate pseudo 95% confidence intervals around the overall summary estimate.

Abbreviation: SMD, standardized mean difference.

**eTable 7. Meta-Regression Analysis to Explore Sources of Heterogeneity Among Randomized Clinical Trials of Palliative Care**

| Subgroups by Trial Characteristics                                                   | No.     |              |         | SMD or HR <sup>a</sup> (95% CI) | P Value for Heterogeneity |
|--------------------------------------------------------------------------------------|---------|--------------|---------|---------------------------------|---------------------------|
|                                                                                      | Studies | Intervention | Control |                                 |                           |
| <b>Association Between Palliative Care and Patient Quality of Life at 1-3 Months</b> |         |              |         |                                 |                           |
| Risk of bias                                                                         |         |              |         |                                 |                           |
| Low                                                                                  | 5       | 397          | 374     | 0.20 (0.06, 0.34)               |                           |
| High                                                                                 | 7       | 406          | 455     | 0.93 (0.00, 1.85)               | 0.50                      |
| Unclear                                                                              | 3       | 409          | 314     | -0.10 (-0.30, 0.09)             |                           |
| Risk of bias                                                                         |         |              |         |                                 |                           |
| Low & Unclear                                                                        | 8       | 806          | 688     | 0.08 (-0.08, 0.24)              | 0.25                      |
| High                                                                                 | 7       | 406          | 455     | 0.93 (0.00, 1.85)               |                           |
| Setting                                                                              |         |              |         |                                 |                           |
| Ambulatory                                                                           | 8       | 646          | 565     | 0.12 (-0.08, 0.31)              |                           |
| Hospital                                                                             | 2       | 118          | 118     | 2.69 (-2.60, 7.98)              | 0.04                      |
| Home                                                                                 | 5       | 448          | 460     | 0.16 (0.00, 0.32)               |                           |
| Disease                                                                              |         |              |         |                                 |                           |
| Cancer                                                                               | 11      | 876          | 794     | 0.12 (-0.02, 0.27)              |                           |
| Non-Cancer                                                                           | 3       | 294          | 309     | 1.98 (-0.56, 4.51)              | 0.11                      |
| Mixed                                                                                | 1       | 42           | 40      | 0.05 (-0.38, 0.49)              |                           |
| No. of participants                                                                  |         |              |         |                                 |                           |
| ≥100                                                                                 | 10      | 1005         | 927     | 0.63 (0.08, 0.83)               | 0.48                      |
| <100                                                                                 | 5       | 207          | 216     | 0.12 (-0.13, 0.37)              |                           |
| Intervention intensity                                                               |         |              |         |                                 |                           |
| High                                                                                 | 9       | 642          | 639     | 0.80 (0.16, 1.45)               | 0.25                      |
| Low                                                                                  | 6       | 570          | 504     | -0.04 (-0.18, 0.11)             |                           |
| <b>Association Between Palliative Care and Symptom Burden at 1-3 Months</b>          |         |              |         |                                 |                           |
| Risk of bias                                                                         |         |              |         |                                 |                           |
| Low                                                                                  | 4       | 362          | 336     | -0.21 (-0.42, 0.00)             |                           |
| High                                                                                 | 5       | 288          | 310     | -1.01 (-2.37, 0.34)             | 0.74                      |
| Unclear                                                                              | 1       | 25           | 21      | -0.75 (-1.35, -0.15)            |                           |
| Risk of bias                                                                         |         |              |         |                                 |                           |
| Low & Unclear                                                                        | 5       | 387          | 357     | -0.27 (-0.50, -0.04)            | 0.47                      |
| High                                                                                 | 5       | 288          | 310     | -1.01 (-2.37, 0.34)             |                           |
| Setting                                                                              |         |              |         |                                 |                           |
| Ambulatory                                                                           | 4       | 278          | 257     | -0.26 (-0.56, 0.04)             |                           |
| Hospital                                                                             | 1       | 79           | 88      | -4.51 (-5.09, -3.94)            | <0.001                    |
| Home                                                                                 | 5       | 318          | 322     | -0.19 (-0.49, 0.12)             |                           |
| Disease                                                                              |         |              |         |                                 |                           |
| Cancer                                                                               | 5       | 445          | 439     | -0.14 (-0.39, 0.10)             |                           |
| Non-Cancer                                                                           | 3       | 147          | 150     | -1.95 (-4.40, 0.49)             | 0.12                      |
| Mixed                                                                                | 2       | 83           | 78      | -0.08 (-0.39, 0.23)             |                           |
| No. of participants                                                                  |         |              |         |                                 |                           |
| ≥100                                                                                 | 6       | 524          | 527     | -0.85 (-1.75, 0.04)             | 0.61                      |
| <100                                                                                 | 4       | 151          | 140     | -0.35 (-0.68, -0.02)            |                           |
| Intervention intensity                                                               |         |              |         |                                 |                           |
| High                                                                                 | 7       | 539          | 529     | -0.88 (-1.71, -0.06)            | 0.47                      |
| Low                                                                                  | 3       | 136          | 138     | -0.17 (-0.41, 0.07)             |                           |
| <b>Association Between Palliative Care and Survival</b>                              |         |              |         |                                 |                           |
| Risk of bias                                                                         |         |              |         |                                 |                           |
| Low                                                                                  | 1       | 161          | 161     | 0.82 (0.64, 1.07)               |                           |
| High                                                                                 | 2       | 193          | 190     | 1.01 (0.32, 3.17)               | 0.97                      |
| Unclear                                                                              | 4       | 766          | 700     | 0.95 (0.70, 1.29)               |                           |
| Risk of bias                                                                         |         |              |         |                                 |                           |
| Low & Unclear                                                                        | 5       | 927          | 861     | 0.92 (0.71, 1.20)               | 0.92                      |
| High                                                                                 | 2       | 193          | 190     | 1.01 (0.32, 3.17)               |                           |

**eTable 7. Meta-Regression Analysis to Explore Sources of Heterogeneity Among Randomized Clinical Trials of Palliative Care**

| Subgroups by Trial Characteristics | No.     |              |         | SMD or HR <sup>a</sup> (95% CI) | P Value for Heterogeneity |
|------------------------------------|---------|--------------|---------|---------------------------------|---------------------------|
|                                    | Studies | Intervention | Control |                                 |                           |
| Setting                            |         |              |         |                                 |                           |
| Ambulatory                         | 1       | 77           | 74      | 0.59 (0.39, 0.88)               |                           |
| Hospital                           | 3       | 460          | 420     | 1.11 (0.69, 1.77)               | 0.51                      |
| Home                               | 3       | 583          | 557     | 0.87 (0.58, 1.29)               |                           |
| Disease                            |         |              |         |                                 |                           |
| Cancer                             | 4       | 542          | 501     | 0.82 (0.60, 1.13)               |                           |
| Non-Cancer                         | 2       | 303          | 313     | 0.93 (0.23, 3.77)               | 0.74                      |
| Mixed                              | 1       | 275          | 237     | 1.22 (0.98, 1.53)               |                           |
| No. of participants                |         |              |         |                                 |                           |
| ≥300                               | 4       | 858          | 794     | 0.98 (0.75, 1.29)               | 0.73                      |
| <300                               | 3       | 262          | 257     | 0.84 (0.48, 1.45)               |                           |
| Intervention intensity             |         |              |         |                                 |                           |
| High                               | 5       | 698          | 655     | 0.90 (0.65, 1.25)               | 0.85                      |
| Low                                | 2       | 422          | 396     | 0.79 (0.31, 1.99)               |                           |

Note: SMD, standardized mean difference. HR, hazard ratio. CI, confidence interval. <sup>a</sup> = SMDs provided for meta-regressions of quality of life and symptom burden, whereas HRs provided for meta-regressions of survival.



## eFigure 7. Association of Palliative Care and Patient Symptom Burden at 1-3 Month Follow-up Stratified by Disease

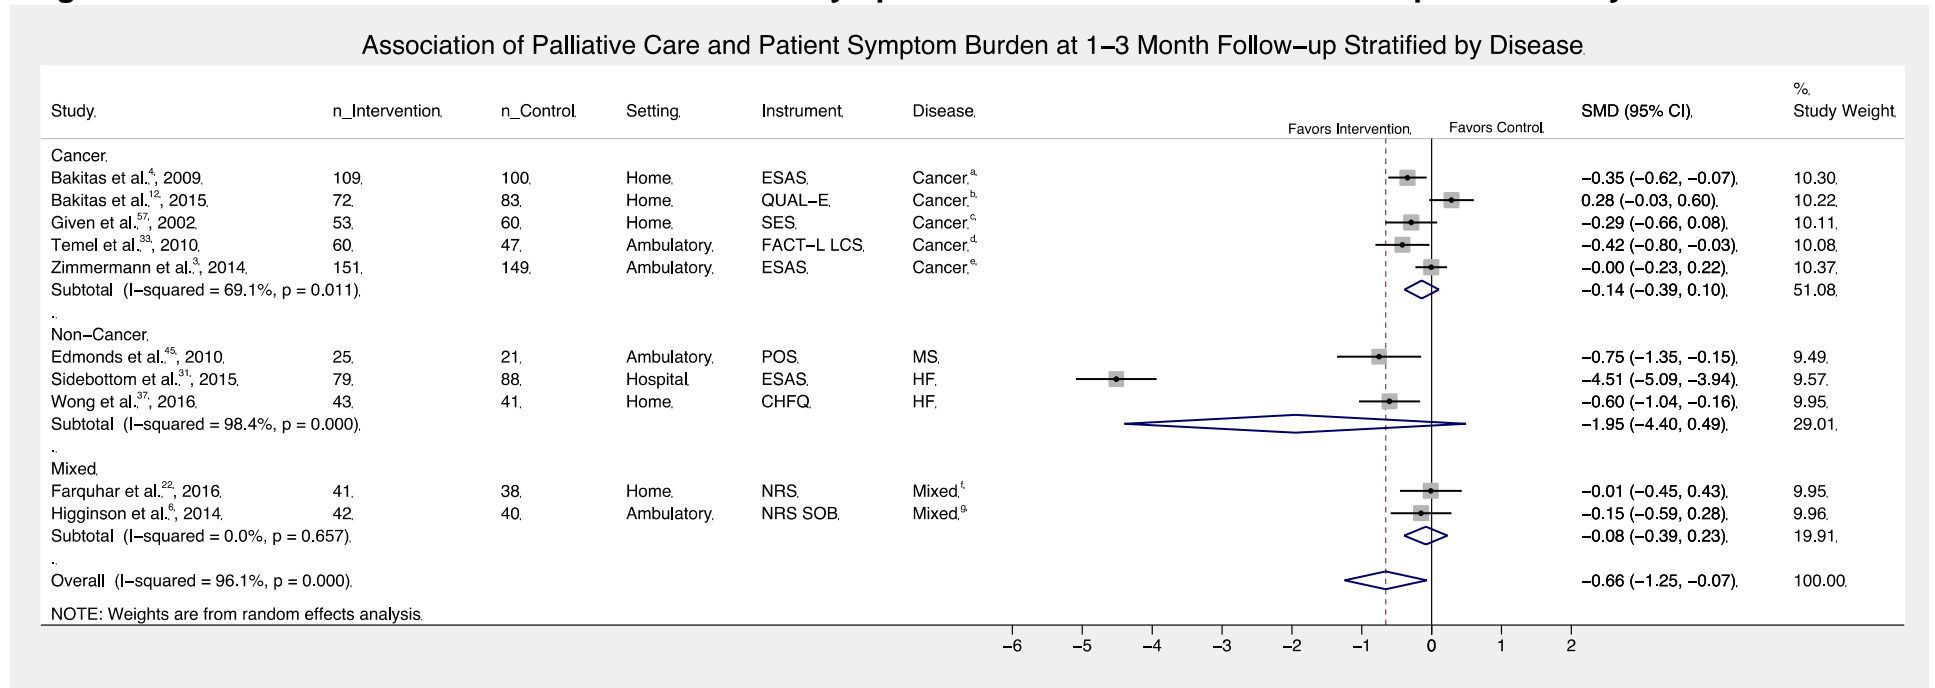

Note: Cancer: P-value for pooled SMD=0.26, Tau<sup>2</sup>=0.05, Q=12.96; Non-cancer: P-value for pooled SMD=0.12, Tau<sup>2</sup>=4.59, Q=125.21; Mixed: P-value for pooled SMD=0.60, Tau<sup>2</sup><0.0001, Q=0.20. Sample sizes in the figure are the number of patients analyzed corresponding to the studies at the specific time points.

Disease status: a: gastrointestinal, lung, genitourinary, and breast cancers. b: solid or hematological cancer. c: breast, colon, lung, and gynecological cancers, and lymphoma. d: non-small cell lung cancer. e: lung, gastrointestinal, genitourinary, breast, and gynecological cancers. f: COPD or other source of dyspnea. g: cancer, COPD, HF, ILD, ALS.

Legend: Dots within shaded squares indicate SMDs from trials, with horizontal lines indicating 95% CI (confidence interval). The size of the shaded squares indicates the study weight. Diamonds represent pooled SMDs and 95% CIs. The vertical dashed line indicates the pooled effect estimate, and the solid vertical line depicts a null effect (i.e., SMD=0).

Abbreviations: SMD, standardized mean difference. SES, Symptom Experience Scale. POS, Palliative Outcomes Scale. FACT-L LCS, Functional Assessment of Cancer Therapy-Lung Cancer Scale. NRS SOB, Numerical Rating Scale Shortness of Breath. ESAS, Edmonton Symptom Assessment Scale. QUAL-E, Quality of Life at the End of Life. CHFQ, Chronic Heart Failure Questionnaire. MS, multiple sclerosis. HF, heart failure. COPD, chronic obstructive pulmonary disease. ILD, interstitial lung disease. ALS, amyotrophic lateral sclerosis.

**eFigure 8. Association of Palliative Care and Patient Symptom Burden at 1-3 Month Follow-up Stratified by Setting**

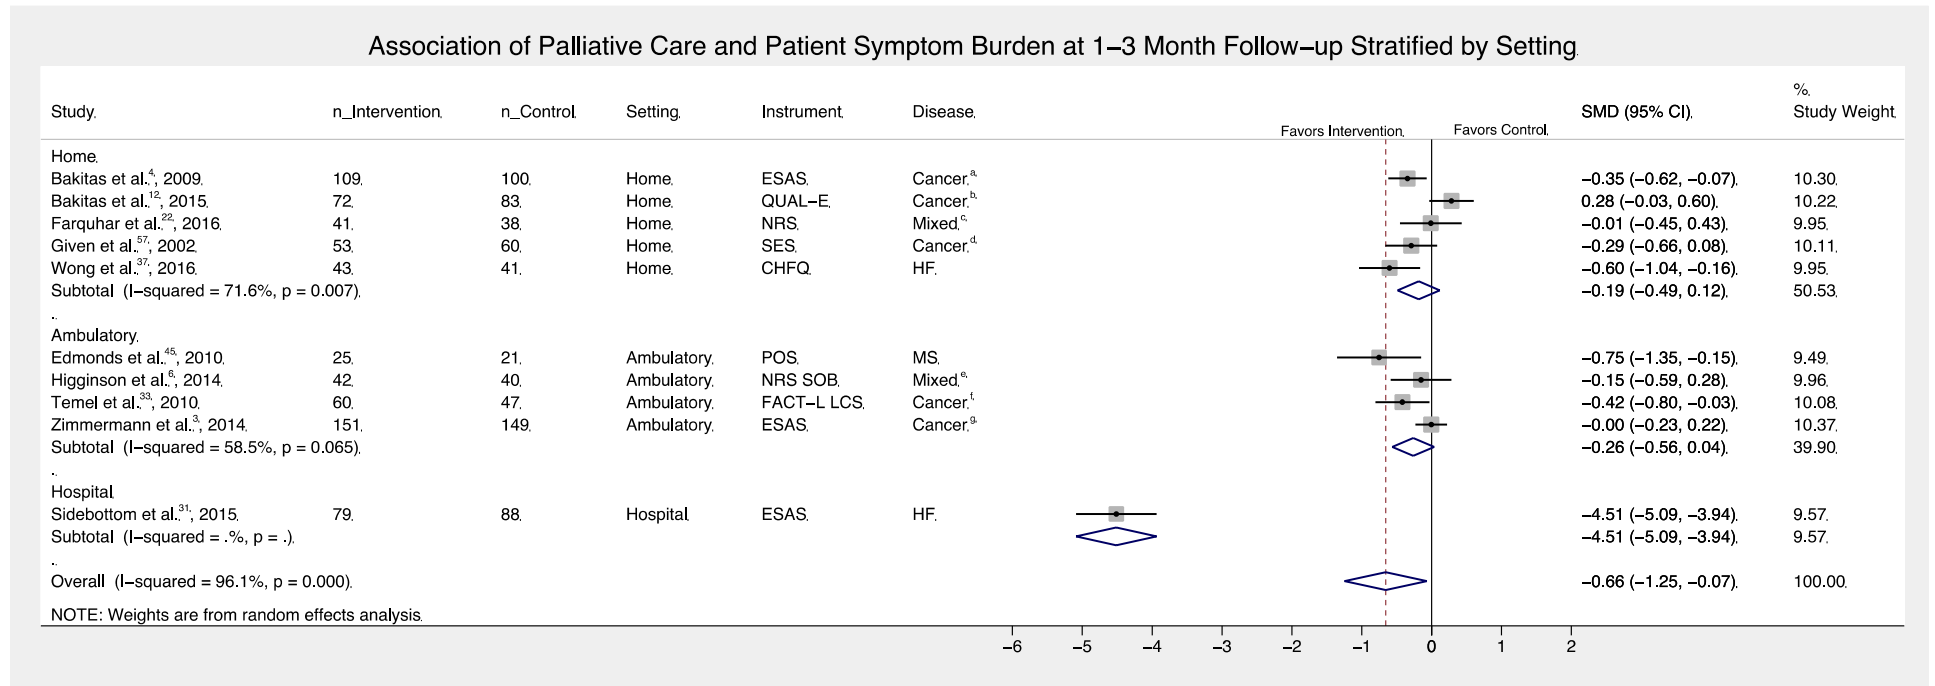

Note: Ambulatory: P-value for pooled SMD=0.09, Tau<sup>2</sup>=0.05, Q=7.23; Hospital: P-value for pooled SMD<0.0001, Tau<sup>2</sup><0.0001, Q<0.0001; Home: P-value for pooled SMD=0.23, Tau<sup>2</sup>=0.08, Q=14.09. Sample sizes in the figure are the number of patients analyzed corresponding to the studies at the specific time points.

Disease status: a: gastrointestinal, lung, genitourinary, and breast cancers. b: solid or hematological cancer. c: COPD or other source of dyspnea. d: breast, colon, lung, and gynecological cancers, and lymphoma. e: cancer, COPD, HF, ILD, ALS. f: non-small cell lung cancer. g: lung, gastrointestinal, genitourinary, breast, and gynecological cancers.

Legend: Dots within shaded squares indicate SMDs from trials, with horizontal lines indicating 95% CI (confidence interval). The size of the shaded squares indicates the study weight. Diamonds represent pooled SMDs and 95% CIs. The vertical dashed line indicates the pooled effect estimate, and the solid vertical line depicts a null effect (i.e., SMD=0).

Abbreviations: SMD, standardized mean difference. SES, Symptom Experience Scale. POS, Palliative Outcomes Scale. FACT-L LCS, Functional Assessment of Cancer Therapy-Lung Lung Cancer Scale. NRS SOB, Numerical Rating Scale Shortness of Breath. ESAS, Edmonton Symptom Assessment Scale. QUAL-E, Quality of Life at the End of Life. CHFQ, Chronic Heart Failure Questionnaire. MS, multiple sclerosis. HF, heart failure. COPD, chronic obstructive pulmonary disease. ILD, interstitial lung disease. ALS, amyotrophic lateral sclerosis.

**eFigure 9. Sensitivity Analysis of the Association between Palliative Care and Patient Symptom Burden at a Discrete Timepoint (3 months)**

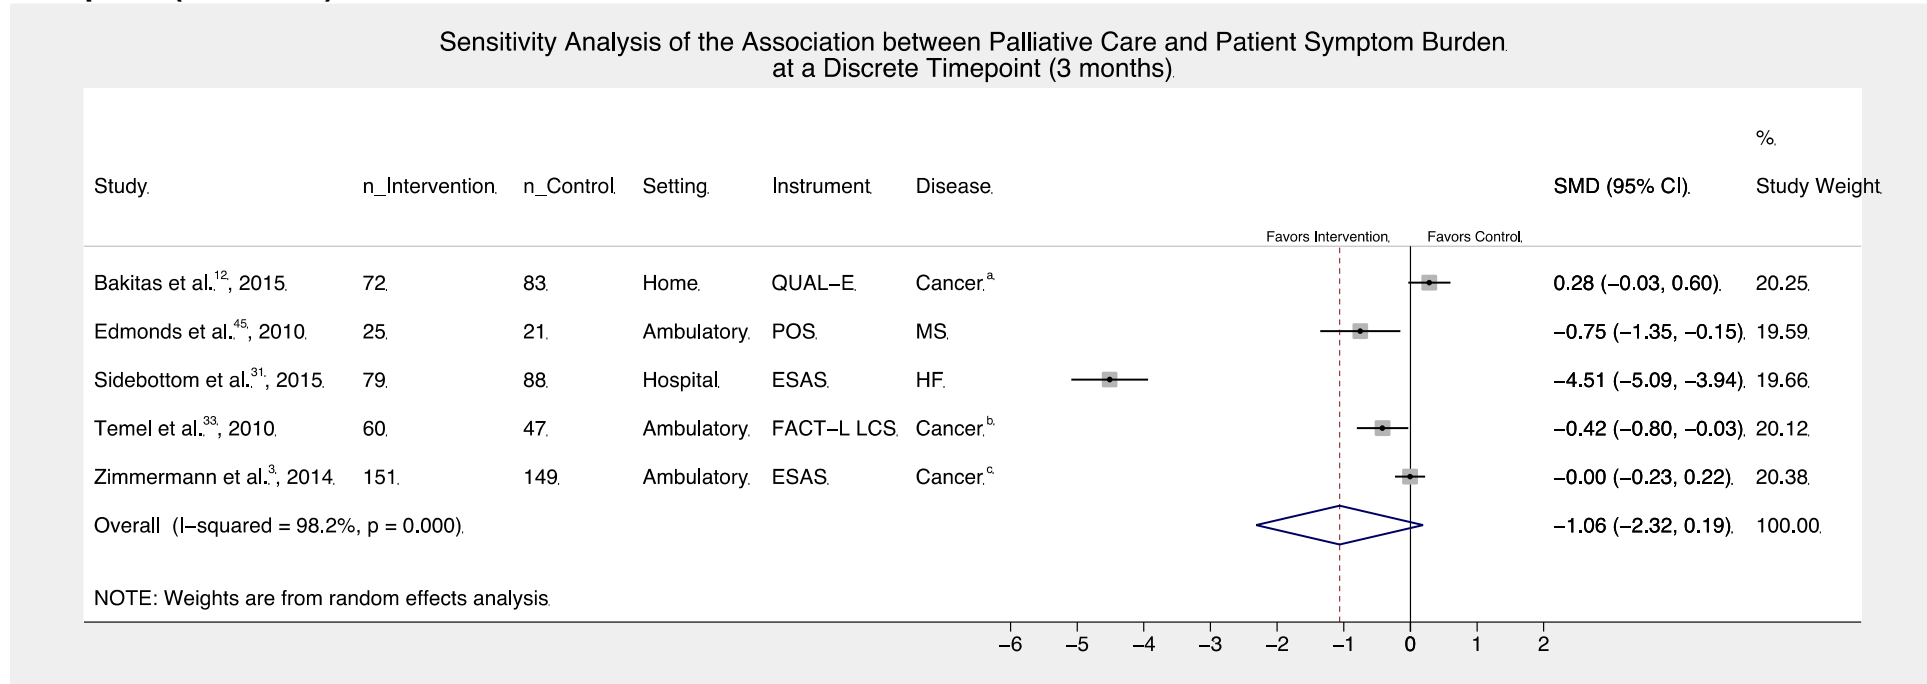

Note: P-value for pooled SMD=0.10, Tau<sup>2</sup>=2.00, Q=226.41. Sample sizes in the figure are the number of patients analyzed corresponding to the studies at the specific time points.

Disease status: a: solid or hematological cancer. b: non-small cell lung cancer. c: lung, gastrointestinal, genitourinary, breast, and gynecological cancer.

Legend: Dots within shaded squares indicate SMDs from trials, with horizontal lines indicating 95% CI (confidence interval). The size of the shaded squares indicates the study weight. Diamonds represent pooled SMDs and 95% CIs. The vertical dashed line indicates the pooled effect estimate, and the solid vertical line depicts a null effect (i.e., SMD=0).

Abbreviations: SMD, standardized mean difference. POS, Palliative Outcomes Scale. FACT-L LCS, Functional Assessment of Cancer Therapy-Lung Lung Cancer Scale. ESAS, Edmonton Symptom Assessment Scale. QUAL-E, Quality of Life at the End of Life. MS, multiple sclerosis. HF, heart failure

**eFigure 10. Assessment of Publication Bias Regarding Symptom Burden at 1-3 Month Follow-Up in Randomized Clinical Trials of Palliative Care Interventions**

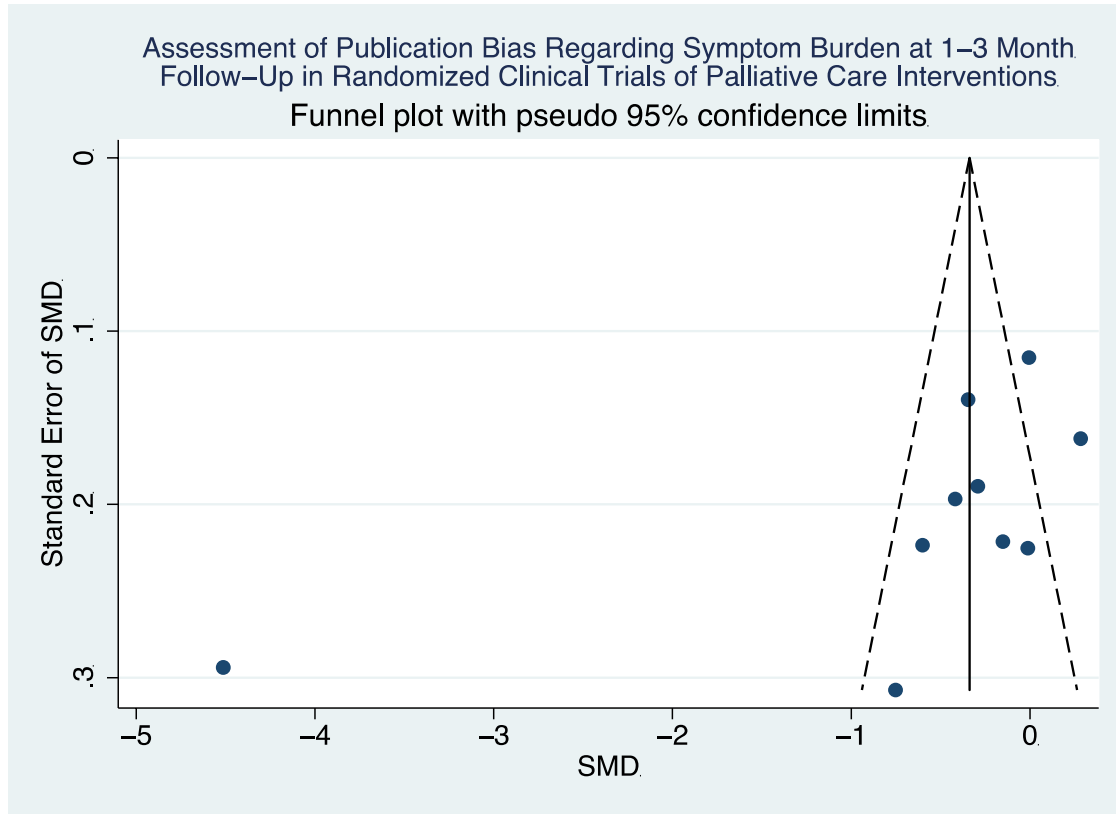

Note: Egger's test bias estimate (SE): -9.33 (4.81), P=0.09.

Legend: Dotted lines indicate pseudo 95% confidence intervals around the overall summary estimate.

Abbreviation: SMD, standardized mean difference.

## eFigure 11. Association of Palliative Care and Patient Survival Stratified by Disease

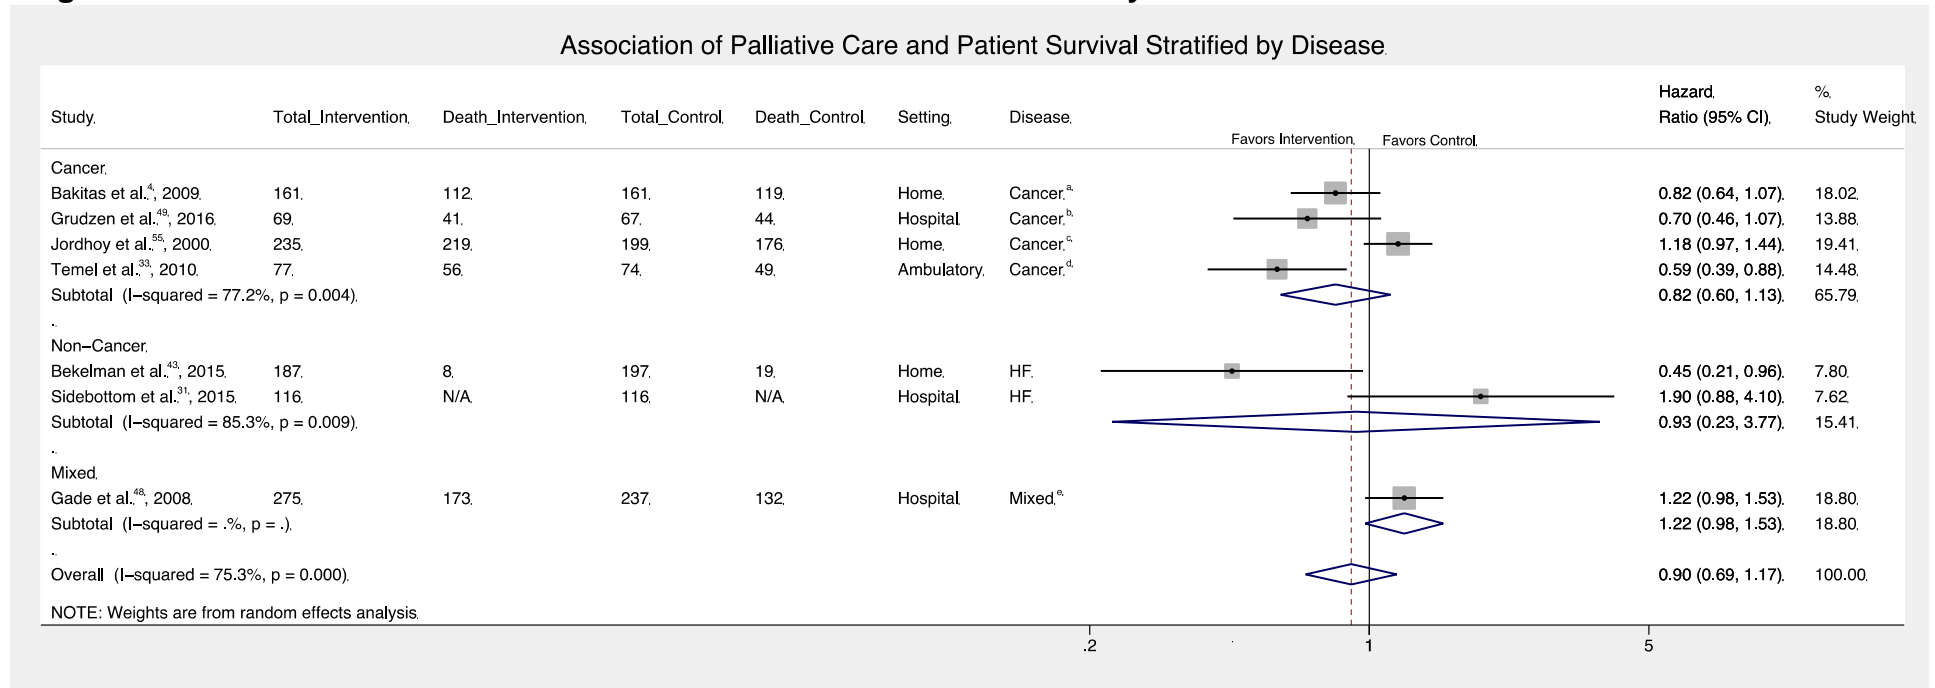

Note: Cancer: P-value for pooled HR=0.23, Tau<sup>2</sup>=0.08, Q=13.18; Non-cancer: P-value for pooled HR=0.92, Tau<sup>2</sup>=0.88, Q=6.80; Mixed: P-value for pooled HR=0.08, Tau<sup>2</sup><0.0001, Q<0.0001.

Disease status: a: gastrointestinal, lung, genitourinary, and breast cancers. b: breast, colon, lung, and other cancers. c: GI, lung, breast, gynecological., genitourinary, kidney, lymph., skin, and other cancers. d: non-small cell lung cancers. e: cancer, HF, COPD, ESRD, stroke, dementia.

Legend: Data dots within shaded squares indicate HRs from trials, with horizontal lines indicating 95% CI (confidence interval). The size of the shaded squares indicates the study weight. Diamonds represent pooled HRs and 95% CIs. The vertical dashed line indicates the pooled effect estimate, and the solid vertical line depicts a null effect (i.e., HR=1).

Abbreviations: HF, heart failure. N/A, not applicable. COPD, chronic obstructive pulmonary disease. ESRD, end stage renal disease.

**eFigure 12. Association of Palliative Care and Patient Survival Stratified by Setting**

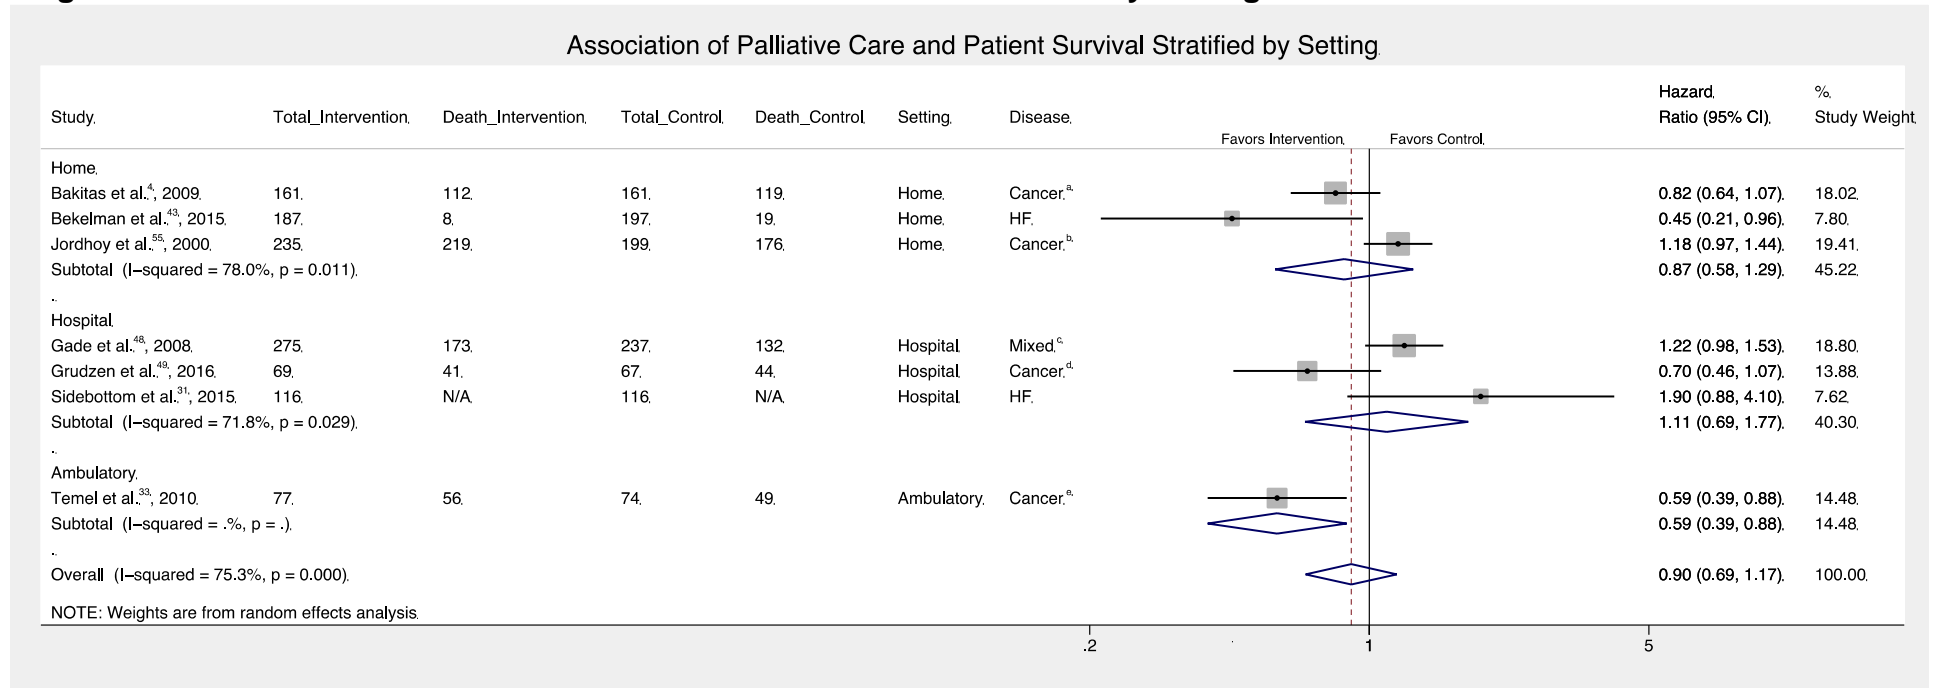

Note: Ambulatory: P-value for pooled HR=0.01, Tau<sup>2</sup><0.0001, Q<0.0001; Hospital: P-value for pooled HR=0.68, Tau<sup>2</sup>=0.12, Q=7.10; Home: P-value for pooled HR=0.48, Tau<sup>2</sup>=0.09, Q=9.10.

Disease status: a: gastrointestinal, lung, genitourinary, and breast cancers. b: gastrointestinal, lung, breast, gynecological, genitourinary, kidney, lymph., skin, and other cancers. c: cancer, HF, COPD, ESRD, stroke, dementia. d: breast, colon, lung, and other cancers. e: non-small cell lung cancer.

Legend: Data dots within shaded squares indicate HRs from trials, with horizontal lines indicating 95% CI (confidence interval). The size of the shaded squares indicates the study weight. Diamonds represent pooled HRs and 95% CIs. The vertical dashed line indicates the pooled effect estimate, and the solid vertical line depicts a null effect (i.e., HR=1).

Abbreviations: HF, heart failure. N/A, not applicable. COPD, chronic obstructive pulmonary disease. ESRD, end stage renal disease..

**eFigure 13. Sensitivity Analysis of Survival Meta-Analysis comparing Reported and Imputed Hazard Ratios**

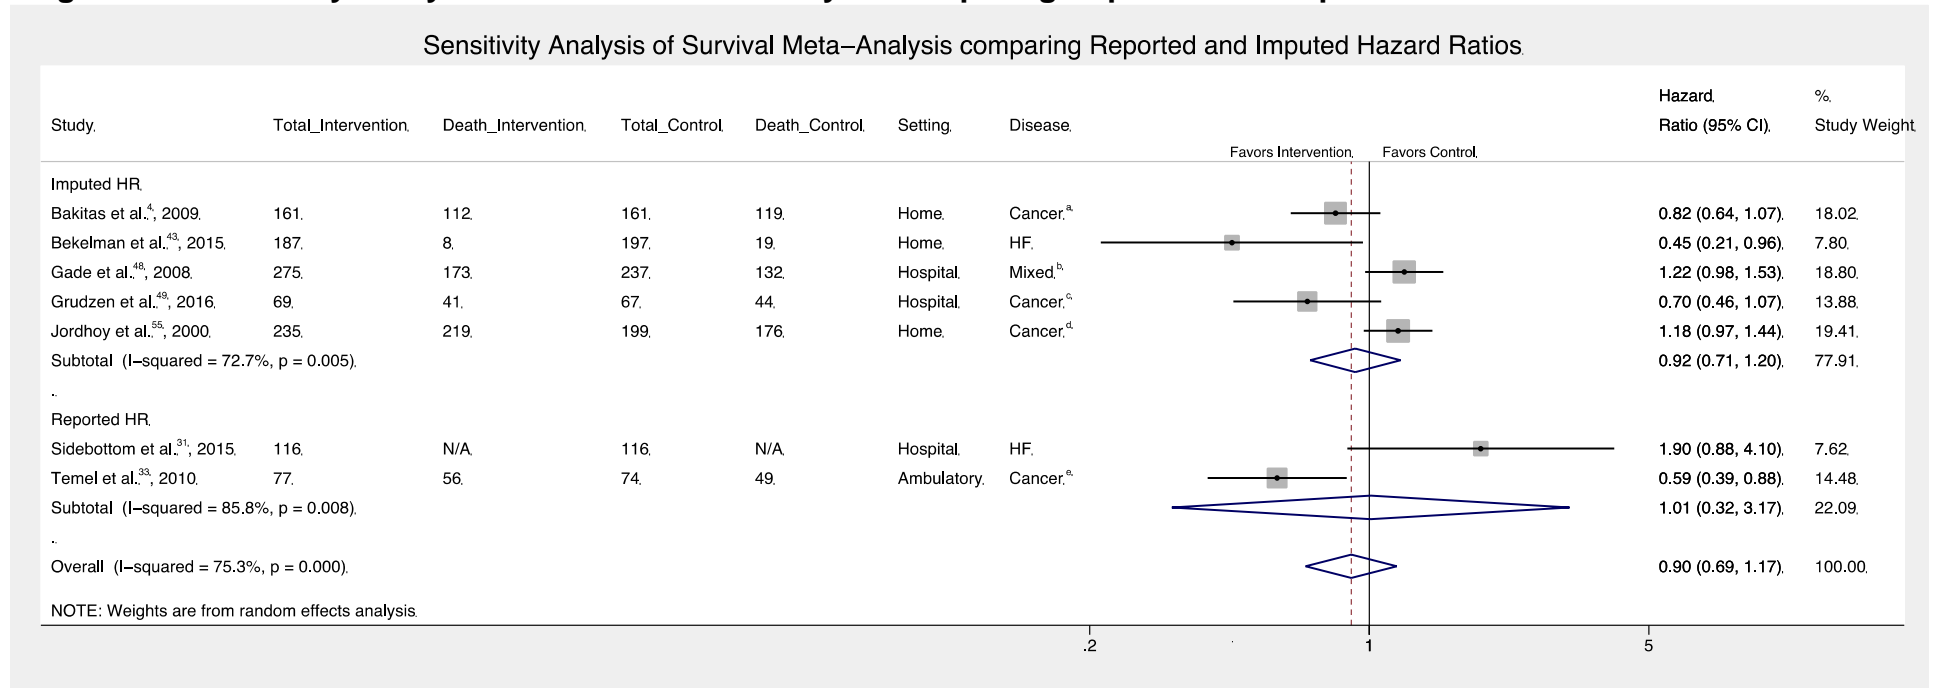

Note: Imputed HR: P-value for pooled HR=0.55, Tau<sup>2</sup>=0.06, Q=14.66; Reported HR: P-value for pooled HR=0.99, Tau<sup>2</sup>=0.59, Q=7.03.

Disease status: a: gastrointestinal, lung, genitourinary, and breast cancers. b: cancer, HF, COPD, ESRD, stroke, dementia. c: breast, colon, lung, and other cancers. d: gastrointestinal, lung, breast, gynecological, genitourinary, kidney, lymph., skin, and other cancers. e: non-small cell lung cancer.

Legend: Data dots within shaded squares indicate HRs from trials, with horizontal lines indicating 95% CI (confidence interval). The size of the shaded squares indicates the study weight. Diamonds represent pooled HRs and 95% CIs. The vertical dashed line indicates the pooled effect estimate, and the solid vertical line depicts a null effect (i.e., HR=1).

Abbreviation: HF, heart failure. N/A, not applicable. COPD, chronic obstructive pulmonary disease. ESRD, end stage renal disease.

**eFigure 14. Publication Bias Regarding Patient Survival in Randomized Clinical Trials of Palliative Care Interventions**

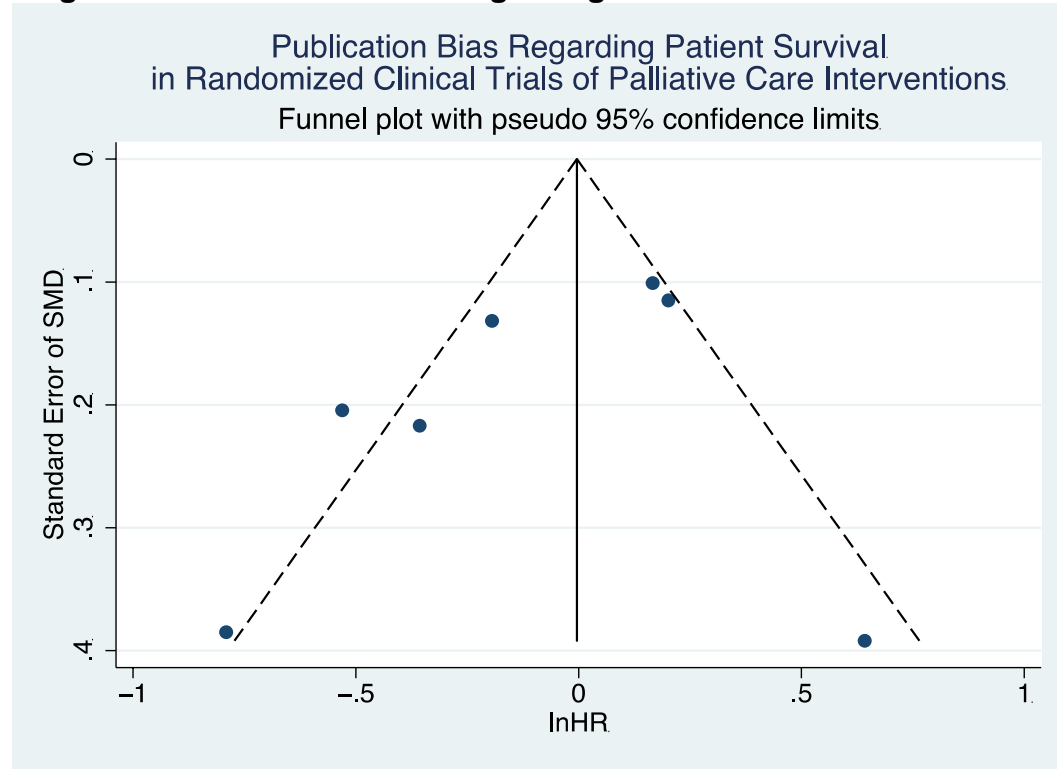

Note: Egger's test bias estimate (SE), -2.07 (1.75), P=0.29.

Legend: Dotted lines indicate pseudo 95% confidence intervals around the overall summary estimate.

Abbreviation: lnHR, natural log of hazard ratio.



**eTable 8. Results of Univariable Meta-Regression Analysis to Identify Associations between Effect Size and Year of Publication and Intervention Intensity**

|                                               | Coefficient | 95% CI          | P-value |
|-----------------------------------------------|-------------|-----------------|---------|
| <b>Quality of life at 1-3 month follow-up</b> |             |                 |         |
| Year of publication                           | 0.053       | (-0.127, 0.232) | 0.538   |
| Intervention intensity (reference: high)      | -0.837      | (-2.347, 0.674) | 0.253   |
| <b>Symptom burden at 1-3 month follow-up</b>  |             |                 |         |
| Year of publication                           | -0.047      | (-0.297, 0.203) | 0.676   |
| Intervention intensity (reference: high)      | 0.740       | (-1.490, 2.969) | 0.466   |
| <b>Survival</b>                               |             |                 |         |
| Year of publication                           | -0.029      | (-0.105, 0.048) | 0.385   |
| Intervention intensity (reference: high)      | -0.079      | (-1.121, 0.964) | 0.854   |

Note: Coefficients for the meta-regressions related to year of publication indicate the difference in the standardized mean difference with every additional year. Coefficients for the meta-regressions related to intervention intensity indicate the difference in the standardized mean difference that studies with low intensity have relative to studies with high intervention intensity. Intervention intensity was dichotomized as “high” if an intervention comprised 6 or more domains of palliative care, whereas interventions comprising 5 or fewer domains were classified as “low” intensity. None of the tests presented are statistically significant ( $P>0.05$ ); therefore, there is no evidence of association between year of publication and effect size, or between intervention intensity and effect size. CI, confidence interval.

## eFigure 15. Plots of Effect Sizes and Follow-up Duration among Trials included in Quality of Life and Symptom Burden Meta-Analyses

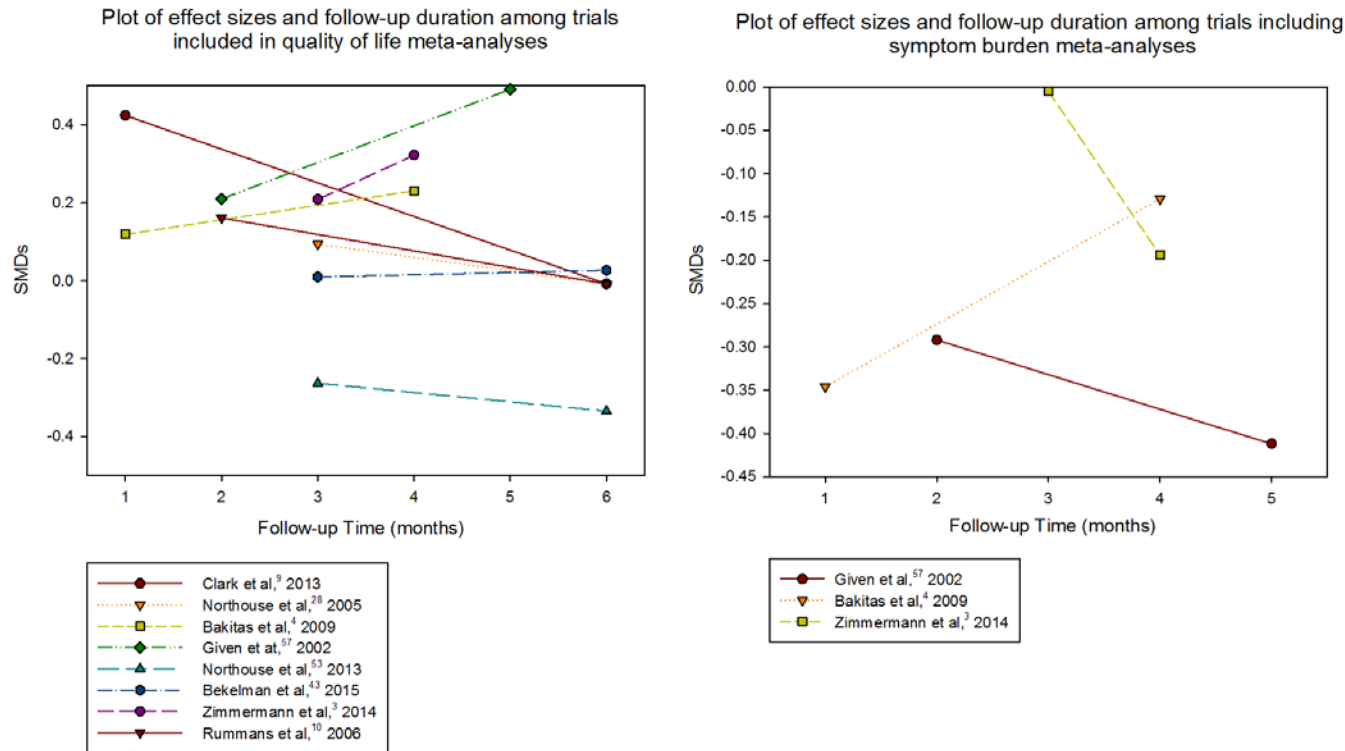

Abbreviations: SMD, standardized mean difference. QoL, quality of life. Legend: Curves were calculated by plotting a line between the standardized mean differences of each trial at each of the two timepoints included. A SMD in the QoL meta-analyses >0 indicates better QoL associated with palliative care as compared to usual care, whereas a SMD<0 in the symptom burden meta-analyses indicates reduced symptom burden associated with palliative care as opposed to usual care.

| Study                               | Timepoint (months), SMD | Timepoint (months), SMD |
|-------------------------------------|-------------------------|-------------------------|
| <b>Quality of Life</b>              |                         |                         |
| Bakitas et al, 2009 <sup>4</sup>    | 1, 0.119                | 4, 0.231                |
| Bekelman et al, 2015 <sup>43</sup>  | 3, 0.01                 | 6, 0.027                |
| Clark et al, 2013 <sup>18</sup>     | 1, 0.424                | 6, -0.008               |
| Given et al, 2002 <sup>57</sup>     | 2, 0.21                 | 5, 0.094                |
| Northouse et al, 2005 <sup>28</sup> | 3, 0.094                | 6, -0.008               |
| Northouse et al, 2013 <sup>53</sup> | 3, -0.263               | 6, -0.335               |
| Rummans et al, 2006 <sup>10</sup>   | 2, 0.161                | 6, 0                    |
| Zimmermann et al, 2014 <sup>3</sup> | 3, 0.209                | 4, 0.322                |
| <b>Symptom Burden</b>               |                         |                         |
| Bakitas et al, 2009 <sup>4</sup>    | 1, -0.346               | 4, -0.129               |
| Given et al, 2002 <sup>57</sup>     | 2, -0.292               | 5, -0.412               |
| Zimmermann et al, 2014 <sup>3</sup> | 3, -0.005               | 4, -0.194               |

**eTable 9. Reasons for Trial Exclusion from Meta-Analysis**

| <b>Trial</b>                         | <b>Reason for exclusion</b>                                                                                                                                                                                                                               |
|--------------------------------------|-----------------------------------------------------------------------------------------------------------------------------------------------------------------------------------------------------------------------------------------------------------|
| <b>Quality of Life</b>               |                                                                                                                                                                                                                                                           |
| Aiken et al, 2006 <sup>11</sup>      | Study reported linear trajectory analysis. Unable to extract standard deviations from data provided.                                                                                                                                                      |
| Dyar et al, 2012 <sup>19</sup>       | Follow-up time point not specified.                                                                                                                                                                                                                       |
| Farquhar et al, 2014 <sup>21</sup>   | Control group is a delayed intervention (by two weeks), and is therefore not comparable to the other included trials.                                                                                                                                     |
| Jordhoy et al, 2001 <sup>54</sup>    | Standard deviations not reported.                                                                                                                                                                                                                         |
| Rabow et al, 2004 <sup>41</sup>      | Standard deviations not reported.                                                                                                                                                                                                                         |
| Radwany et al, 2014 <sup>30</sup>    | It is unclear how the mean difference (Table 3) is calculated.                                                                                                                                                                                            |
| <b>Symptom Burden</b>                |                                                                                                                                                                                                                                                           |
| Aiken et al, 2006 <sup>11</sup>      | Study reported linear trajectory analysis. Unable to extract standard deviations from data provided.                                                                                                                                                      |
| Brannstrom et al, 2014 <sup>14</sup> | Specific estimates not reported in paper.                                                                                                                                                                                                                 |
| Jordhoy et al, 2001 <sup>54</sup>    | Standard deviations not reported.                                                                                                                                                                                                                         |
| Kane et al, 1984 <sup>51</sup>       | Trial reports results as either statistically significant or not. No specific measurements included.                                                                                                                                                      |
| Gade et al, 2008 <sup>48</sup>       | Endpoint of symptom burden measure is at time of hospital discharge which varies by patient.                                                                                                                                                              |
| Rabow et al, 2004 <sup>41</sup>      | Unable to reverse-calculate standard deviation, as ANCOVA model also included other covariates.                                                                                                                                                           |
| Radwany et al, 2014 <sup>30</sup>    | It is unclear how the mean difference (Table 3) is calculated.                                                                                                                                                                                            |
| Rummans et al, 2006 <sup>10</sup>    | It is unclear how mean differences were calculated.                                                                                                                                                                                                       |
| Wallen et al, 2012 <sup>36</sup>     | Unable to reverse-calculate standard deviation.                                                                                                                                                                                                           |
| SUPPORT, 1995 <sup>56</sup>          | Timespan for outcome measure encompasses a two-year period; time point not comparable with other trials in this review.                                                                                                                                   |
| <b>Survival</b>                      |                                                                                                                                                                                                                                                           |
| Ahronheim et al, 2000 <sup>42</sup>  | Reported deaths during hospitalizations and P-value using chi-square test. Chi-square test is only testing for difference in proportion of mortality and it's not the same as testing overall survival difference using log-rank or cox regression model. |
| Brannstrom et al, 2014 <sup>14</sup> | Only reported a p-value regarding differences in survival. Did not specify the type of statistical test used.                                                                                                                                             |
| Engelhardt et al, 2006 <sup>20</sup> | Only survival rates at 18-month time point were reported. The log-rank test for time to completion was reported. This is not the same as overall survival.                                                                                                |
| Higginson et al, 2014 <sup>6</sup>   | Reports generalized Wilcoxon test, which is not comparable with other trials included in meta-analysis (which used log-rank tests).                                                                                                                       |
| Hughes et al, 1992 <sup>26</sup>     | Does mention survival days in each group, but unclear whether these estimates are mean or median. Paper doesn't mention the type of statistical method used to obtain these estimates.                                                                    |
| SUPPORT, 1995 <sup>56</sup>          | Survival was included as a safety endpoint, not as an outcome of interest.                                                                                                                                                                                |
| Wallen et al, 2012 <sup>36</sup>     | Hazard ratio reported is not for overall survival.                                                                                                                                                                                                        |
| Zimmer et al, 1984 <sup>39</sup>     | Unable to convert results of log-likelihood ratio test to hazard ratios.                                                                                                                                                                                  |

## eReferences

1. Dahlin C, National Consensus Project for Quality Palliative Care. *Clinical practice guidelines for quality palliative care*. 2013.
2. Lyons KD, Bakitas M, Hegel MT, Hanscom B, Hull J, Ahles TA. Reliability and validity of the Functional Assessment of Chronic Illness Therapy-Palliative care (FACIT-Pal) scale. *Journal of pain and symptom management*. 2009;37(1):23-32.
3. Zimmermann C, Swami N, Krzyzanowska M, et al. Early palliative care for patients with advanced cancer: a cluster-randomised controlled trial. *Lancet*. 2014;383(9930):1721-1730.
4. Bakitas M, Lyons KD, Hegel MT, et al. Effects of a palliative care intervention on clinical outcomes in patients with advanced cancer: the Project ENABLE II randomized controlled trial. *JAMA : the journal of the American Medical Association*. 2009;302(7):741-749.
5. O'Hara RE, Hull JG, Lyons KD, et al. Impact on caregiver burden of a patient-focused palliative care intervention for patients with advanced cancer. *Palliative & supportive care*. 2010;8(4):395-404.
6. Higginson IJ, Bausewein C, Reilly CC, et al. An integrated palliative and respiratory care service for patients with advanced disease and refractory breathlessness: a randomised controlled trial. *The Lancet Respiratory medicine*. 2014;2(12):979-987.
7. Lowther K, Selman L, Simms V, et al. Nurse-led palliative care for HIV-positive patients taking antiretroviral therapy in Kenya: a randomised controlled trial. *Lancet HIV*. 2015;2(8):e328-334.
8. Northouse LL, Mood DW, Schafenacker A, et al. Randomized clinical trial of a family intervention for prostate cancer patients and their spouses. *Cancer*. 2007;110(12):2809-2818.
9. Clark MM, Rummans TA, Sloan JA, et al. Quality of life of caregivers of patients with advanced-stage cancer. *The American journal of hospice & palliative care*. 2006;23(3):185-191.
10. Rummans TA, Clark MM, Sloan JA, et al. Impacting quality of life for patients with advanced cancer with a structured multidisciplinary intervention: a randomized controlled trial. *Journal of clinical oncology : official journal of the American Society of Clinical Oncology*. 2006;24(4):635-642.
11. Aiken LS, Butner J, Lockhart CA, Volk-Craft BE, Hamilton G, Williams FG. Outcome evaluation of a randomized trial of the PhoenixCare intervention: program of case management and coordinated care for the seriously chronically ill. *Journal of palliative medicine*. 2006;9(1):111-126.
12. Bakitas MA, Tosteson TD, Li Z, et al. Early Versus Delayed Initiation of Concurrent Palliative Oncology Care: Patient Outcomes in the ENABLE III Randomized Controlled Trial. *Journal of clinical oncology : official journal of the American Society of Clinical Oncology*. 2015;33(13):1438-1445.
13. Dionne-Odom JN, Azuero A, Lyons KD, et al. Family Caregiver Depressive Symptom and Grief Outcomes From the ENABLE III Randomized Controlled Trial. *Journal of pain and symptom management*. 2016.

14. Brannstrom M, Boman K. Effects of person-centred and integrated chronic heart failure and palliative home care. PREFER: a randomized controlled study. *European journal of heart failure*. 2014;16(10):1142-1151.
15. Sahlen KG, Boman K, Brannstrom M. A cost-effectiveness study of person-centered integrated heart failure and palliative home care: Based on a randomized controlled trial. *Palliative medicine*. 2016;30(3):296-302.
16. Chapman DG, Toseland RW. Effectiveness of advanced illness care teams for nursing home residents with dementia. *Social work*. 2007;52(4):321-329.
17. Cheung W, Aggarwal G, Fugaccia E, et al. Palliative care teams in the intensive care unit: a randomised, controlled, feasibility study. *Critical care and resuscitation : journal of the Australasian Academy of Critical Care Medicine*. 2010;12(1):28-35.
18. Clark MM, Rummans TA, Atherton PJ, et al. Randomized controlled trial of maintaining quality of life during radiotherapy for advanced cancer. *Cancer*. 2013;119(4):880-887.
19. Dyar S, Lesperance M, Shannon R, Sloan J, Colon-Otero G. A nurse practitioner directed intervention improves the quality of life of patients with metastatic cancer: results of a randomized pilot study. *Journal of palliative medicine*. 2012;15(8):890-895.
20. Engelhardt JB, McClive-Reed KP, Toseland RW, Smith TL, Larson DG, Tobin DR. Effects of a program for coordinated care of advanced illness on patients, surrogates, and healthcare costs: a randomized trial. *The American journal of managed care*. 2006;12(2):93-100.
21. Farquhar MC, Prevost AT, McCrone P, et al. Is a specialist breathlessness service more effective and cost-effective for patients with advanced cancer and their carers than standard care? Findings of a mixed-method randomised controlled trial. *BMC medicine*. 2014;12:194.
22. Farquhar MC, Prevost AT, McCrone P, et al. The clinical and cost effectiveness of a Breathlessness Intervention Service for patients with advanced non-malignant disease and their informal carers: mixed findings of a mixed method randomised controlled trial. *Trials*. 2016;17(1):185.
23. Grande GE, Todd CJ, Barclay SI, Farquhar MC. A randomized controlled trial of a hospital at home service for the terminally ill. *Palliative medicine*. 2000;14(5):375-385.
24. Grande GE, Todd CJ, Barclay SI, Farquhar MC. Does hospital at home for palliative care facilitate death at home? Randomised controlled trial. *BMJ (Clinical research ed)*. 1999;319(7223):1472-1475.
25. Hopp FP, Zalenski RJ, Waselewsky D, et al. Results of a Hospital-Based Palliative Care Intervention for Patients With an Acute Exacerbation of Chronic Heart Failure. *Journal of cardiac failure*. 2016.
26. Hughes SL, Cummings J, Weaver F, Manheim L, Braun B, Conrad K. A randomized trial of the cost effectiveness of VA hospital-based home care for the terminally ill. *Health services research*. 1992;26(6):801-817.
27. McCorkle R, Benoliel JQ, Donaldson G, Georgiadou F, Moinpour C, Goodell B. A randomized clinical trial of home nursing care for lung cancer patients. *Cancer*. 1989;64(6):1375-1382.

28. Northouse L, Kershaw T, Mood D, Schafenacker A. Effects of a family intervention on the quality of life of women with recurrent breast cancer and their family caregivers. *Psycho-oncology*. 2005;14(6):478-491.
29. Pantilat SZ, O'Riordan DL, Dibble SL, Landefeld CS. Hospital-based palliative medicine consultation: a randomized controlled trial. *Archives of internal medicine*. 2010;170(22):2038-2040.
30. Radwany SM, Hazelett SE, Allen KR, et al. Results of the promoting effective advance care planning for elders (PEACE) randomized pilot study. *Population health management*. 2014;17(2):106-111.
31. Sidebottom AC, Jorgenson A, Richards H, Kirven J, Sillah A. Inpatient palliative care for patients with acute heart failure: outcomes from a randomized trial. *Journal of palliative medicine*. 2015;18(2):134-142.
32. Steel JL, Geller DA, Kim KH, et al. Web-based collaborative care intervention to manage cancer-related symptoms in the palliative care setting. *Cancer*. 2016;122(8):1270-1282.
33. Temel JS, Greer JA, Muzikansky A, et al. Early palliative care for patients with metastatic non-small-cell lung cancer. *The New England journal of medicine*. 2010;363(8):733-742.
34. Greer JA, Pirl WF, Jackson VA, et al. Effect of early palliative care on chemotherapy use and end-of-life care in patients with metastatic non-small-cell lung cancer. *Journal of clinical oncology : official journal of the American Society of Clinical Oncology*. 2012;30(4):394-400.
35. Pirl WF, Greer JA, Traeger L, et al. Depression and survival in metastatic non-small-cell lung cancer: effects of early palliative care. *Journal of clinical oncology : official journal of the American Society of Clinical Oncology*. 2012;30(12):1310-1315.
36. Wallen GR, Baker K, Stolar M, et al. Palliative care outcomes in surgical oncology patients with advanced malignancies: a mixed methods approach. *Quality of life research : an international journal of quality of life aspects of treatment, care and rehabilitation*. 2012;21(3):405-415.
37. Wong FK, Ng AY, Lee PH, et al. Effects of a transitional palliative care model on patients with end-stage heart failure: a randomised controlled trial. *Heart*. 2016;102(14):1100-1108.
38. Zimmer JG, Groth-Juncker A, McCusker J. A randomized controlled study of a home health care team. *American journal of public health*. 1985;75(2):134-141.
39. Zimmer JG, Groth-Juncker A, McCusker J. Effects of a physician-led home care team on terminal care. *Journal of the American Geriatrics Society*. 1984;32(4):288-292.
40. McCorkle R, Jeon S, Ercolano E, et al. An Advanced Practice Nurse Coordinated Multidisciplinary Intervention for Patients with Late-Stage Cancer: A Cluster Randomized Trial. *Journal of palliative medicine*. 2015;18(11):962-969.
41. Rabow MW, Dibble SL, Pantilat SZ, McPhee SJ. The comprehensive care team: a controlled trial of outpatient palliative medicine consultation. *Archives of internal medicine*. 2004;164(1):83-91.

42. Ahronheim JC, Morrison RS, Morris J, Baskin S, Meier DE. Palliative care in advanced dementia: a randomized controlled trial and descriptive analysis. *Journal of palliative medicine*. 2000;3(3):265-273.
43. Bekelman DB, Plomondon ME, Carey EP, et al. Primary Results of the Patient-Centered Disease Management (PCDM) for Heart Failure Study: A Randomized Clinical Trial. *JAMA internal medicine*. 2015;175(5):725-732.
44. Brumley R, Enguidanos S, Jamison P, et al. Increased satisfaction with care and lower costs: results of a randomized trial of in-home palliative care. *Journal of the American Geriatrics Society*. 2007;55(7):993-1000.
45. Edmonds P, Hart S, Wei G, et al. Palliative care for people severely affected by multiple sclerosis: evaluation of a novel palliative care service. *Multiple sclerosis (Houndmills, Basingstoke, England)*. 2010;16(5):627-636.
46. Higginson IJ, McCrone P, Hart SR, Burman R, Silber E, Edmonds PM. Is short-term palliative care cost-effective in multiple sclerosis? A randomized phase II trial. *Journal of pain and symptom management*. 2009;38(6):816-826.
47. Higginson IJ, Costantini M, Silber E, Burman R, Edmonds P. Evaluation of a new model of short-term palliative care for people severely affected with multiple sclerosis: a randomised fast-track trial to test timing of referral and how long the effect is maintained. *Postgraduate medical journal*. 2011;87(1033):769-775.
48. Gade G, Venohr I, Conner D, et al. Impact of an inpatient palliative care team: a randomized control trial. *Journal of palliative medicine*. 2008;11(2):180-190.
49. Grudzen CR, Richardson LD, Johnson PN, et al. Emergency Department-Initiated Palliative Care in Advanced Cancer: A Randomized Clinical Trial. *JAMA Oncol*. 2016.
50. Hanks GW, Robbins M, Sharp D, et al. The imPaCT study: a randomised controlled trial to evaluate a hospital palliative care team. *British journal of cancer*. 2002;87(7):733-739.
51. Kane RL, Wales J, Bernstein L, Leibowitz A, Kaplan S. A randomised controlled trial of hospice care. *Lancet*. 1984;1(8382):890-894.
52. Kane RL, Klein SJ, Bernstein L, Rothenberg R, Wales J. Hospice role in alleviating the emotional stress of terminal patients and their families. *Medical care*. 1985;23(3):189-197.
53. Northouse LL, Mood DW, Schafenacker A, et al. Randomized clinical trial of a brief and extensive dyadic intervention for advanced cancer patients and their family caregivers. *Psycho-oncology*. 2013;22(3):555-563.
54. Jordhoy MS, Fayers P, Loge JH, Ahlner-Elmqvist M, Kaasa S. Quality of life in palliative cancer care: results from a cluster randomized trial. *Journal of clinical oncology : official journal of the American Society of Clinical Oncology*. 2001;19(18):3884-3894.
55. Jordhoy MS, Fayers P, Saltnes T, Ahlner-Elmqvist M, Jannert M, Kaasa S. A palliative-care intervention and death at home: a cluster randomised trial. *Lancet*. 2000;356(9233):888-893.
56. A controlled trial to improve care for seriously ill hospitalized patients. The study to understand prognoses and preferences for outcomes and risks of treatments (SUPPORT). The SUPPORT Principal Investigators. *JAMA : the journal of the American Medical Association*. 1995;274(20):1591-1598.

57. Given B, Given CW, McCorkle R, et al. Pain and fatigue management: results of a nursing randomized clinical trial. *Oncology nursing forum*. 2002;29(6):949-956.
